# Supplementary material for: Large-scale gene analysis of rabbit atherosclerosis to discover new biomarkers for coronary artery disease
Source: Open Biol. 2019 Jan 23;9(1):180238. doi: 10.1098/rsob.180238 (PMC6367139; doi:10.1098/rsob.180238)
Supplement: Supplementary Table 1 [file rsob180238supp2.xlsx]

## Sheet: 3716 genes
			GeneSymbol	AS0	Fold (AS30/AS0)	Fold (AS60/AS0)
			42258	1	3.11666	2.17347
			2016-03-07	1	1.54756	2.67586
			2016-03-08	1	0.707107	0.309927
			2016-09-04	1	0.539614	0.460094
			A4GALT	1	1.69349	2.11404
			AAAS	1	0.673617	0.45376
			AARD	1	1.77769	2.49666
			AATF	1	0.469761	0.840896
			ABAT	1	0.289172	0.539614
			ABCA3	1	0.255253	0.193446
			ABCA9	1	0.574349	0.0679209
			ABCB1	1	0.456916	0.521233
			ABCB8	1	1.43396	0.578344
			ABCC11	1	0.127627	0.148651
			ABCC9	1	2.67586	3.78423
			ABCD4	1	0.646176	0.275476
			ABCF1	1	0.400535	0.840896
			ABHD1	1	2.07053	1.23114
			ABHD1	1	2.69447	2.88786
			ABHD11	1	0.41466	0.251739
			ABHD12	1	0.594604	0.285191
			ABHD14A	1	0.535887	0.438303
			ABHD14B	1	0.432269	0.371131
			ABHD4	1	1.46409	0.692555
			ABHD5	1	0.181747	0.264255
			ABHD6	1	0.5	0.339151
			ABI3	1	0.493116	0.376312
			ABL2	1	2.67586	5.85634
			ABLIM3	1	0.0921418	0.138696
			ABRA	1	0.447513	1.61328
			ABRACL	1	6.40856	5.73582
			ACAA2	1	0.173139	0.262429
			ACACA	1	0.146604	0.11344
			ACADS	1	0.332171	0.281265
			ACADSB	1	0.543367	0.493116
			ACAT2	1	0.0830429	0.0563282
			ACBD3	1	1.8025	2.42839
			ACBD5	1	0.702222	0.432269
			ACE	1	0.14161	0.0583146
			ACE-1	1	0.213159	0.00961832
			ACER2	1	0.200267	0.456916
			ACKR4	1	0.166086	0.166086
			ACO1	1	0.181747	0.496546
			ACO2	1	0.208772	0.353553
			ACOX2	1	0.0303955	0.0108212
			ACP5	1	0.521233	0.151774
			ACSBG2	1	6.23332	5.02805
			ACSF2	1	0.119908	0.138696
			ACSL5	1	0.258816	0.124137
			ACSM5	1	0.243164	0.619854
			ACSS2	1	0.0109722	0.0169802
			ACSS3	1	0.0349152	0.0248605
			ACTA2	1	11.8762	16
			ACTBL2	1	8.11168	9.91766
			ACTG2	1	12.9063	23.7524
			ACTL6B	1	2.07053	1.40444
			ACTL7B	1	2.26577	1.56917
			ACTN1	1	7.01285	12.9063
			ACTN2	1	4.05584	6.63456
			ACTR1B	1	0.0301855	1.30134
			ACTR3	1	2.21914	2.23457
			ACTR3B	1	2.63902	4.69134
			ACVR1	1	2.32947	3.18215
			ACVR1B	1	0.360982	4.25748
			ACVR1C	1	0.0947323	0.0791098
			ACVR2A	1	0.726986	0.444421
			ACYP1	1	0.447513	0.20733
			ADA	1	0.225313	0.230047
			ADAD1	1	113.772	377.413
			ADAM12	1	0.211686	0.285191
			ADAM15	1	0.435275	0.503478
			ADAM19	1	2.80889	4.65893
			ADAM2	1	0.378929	0.479632
			ADAM22	1	3.70635	4
			ADAM6	1	0.528509	0.381565
			ADAMTS12	1	0.397768	0.423373
			ADAMTS16	1	0.075363	0.0387409
			ADAMTS5	1	0.109576	0.102949
			ADAMTS6	1	4.85678	2
			ADAMTS9	1	0.257028	0.952638
			ADAMTSL4	1	5.73582	4.16986
			ADARB1	1	2.92817	6.77396
			ADARB2	1	0.441351	0.673617
			ADAT2	1	1.40444	0.655197
			ADCY10	1	2.07053	2.54912
			ADCY2	1	1.72907	3.34035
			ADCY4	1	0.127627	0.120742
			ADCY5	1	1.67018	3.31728
			ADCY6	1	0.408951	0.277392
			ADCY8	1	2.49666	3.11666
			ADCY9	1	15.7797	17.0299
			ADCYAP1	1	0.5	0.397768
			ADH1A	1	0.0358968	0.013697
			ADH2-1	1	0.0216423	0.0277763
			ADHFE1	1	0.664343	0.356013
			ADI1	1	0.323088	0.417544
			ADIPOQ	1	0.00916277	0.00454974
			ADIPOR1	1	0.598739	1.33793
			ADIPOR2	1	0.0334929	0.0418102
			ADM	1	0.558644	2.39496
			ADORA1	1	0.0500669	0.0435857
			ADORA2B	1	0.48971	1.68179
			ADORA3	1	0.574349	1.36604
			ADRA1A	1	2.49666	2.42839
			ADRA1B	1	1.65864	0.392292
			ADRA1D	1	2.07053	2.82843
			ADRA2A	1	0.133972	0.0188407
			ADRB2	1	0.230047	0.582367
			ADRBK2	1	0.0321286	0.0210505
			AFAP1L1	1	0.125	0.104386
			AFAP1L2	1	1.75321	2
			AFF2	1	3.31728	3.45815
			AFF4	1	2.09943	3.73213
			AGAP3	1	4.72397	2.42839
			AGBL5	1	0.444421	0.25
			AGFG2	1	0.343885	0.628507
			AGL	1	3.36359	3.05252
			AGMO	1	0.213159	0.271684
			AGPAT9	1	0.0174576	0.0144779
			AGTR2	1	0.659754	0.426317
			AHCY	1	0.339151	0.411796
			AHI1	1	3.41054	7.56846
			AHR	1	0.234881	0.353553
			AHSA2	1	2.44528	1.94531
			AHSG	1	0.267943	0.0454366
			AIFM1	1	0.594604	0.417544
			AIFM2	1	0.023357	0.0536603
			AK2	1	0.258816	0.223756
			AK3	1	0.668964	0.493116
			AK4	1	3.83706	11.3137
			AKAP6	1	7.11074	11.2356
			AKR1C5	1	0.222211	0.222211
			AKT3	1	3.75809	3.63008
			ALAD	1	0.175556	0.0785633
			ALAS1	1	0.246558	0.236514
			ALAS2	1	0.0587202	0.0107464
			ALB	1	0.325335	0.100134
			ALCAM	1	7.1602	3.05252
			ALDH1A1	1	0.208772	0.0824692
			ALDH1A2	1	6.82108	0.76313
			ALDH1A3	1	0.285191	0.0824692
			ALDH1L2	1	1.95884	0.812252
			ALDH2	1	0.316439	0.373712
			ALDH3A2	1	0.368567	0.307786
			ALDOA	1	0.435275	0.687771
			ALDOC	1	0.0170983	0.00739108
			ALG1	1	0.486327	0.812252
			ALG10	1	0.716978	0.386891
			ALG8	1	0.76313	0.267943
			ALKBH6	1	0.473029	0.432269
			ALKBH7	1	0.444421	0.456916
			ALKBH8	1	0.615572	0.444421
			ALOX15	1	1.42405	0.496546
			ALX4	1	0.586417	2.80889
			AMACR	1	1.68179	0.334482
			AMBP	1	2.01391	1.02101
			AMDHD1	1	0.34151	1.24833
			ANAPC1	1	2.44528	1.44393
			ANGPT2	1	4.85678	3.43426
			ANGPTL1	1	3.65533	4.89056
			ANGPTL2	1	0.258816	0.547147
			ANGPTL3	1	3.09513	1.04972
			ANGPTL4	1	0.20166	1.02101
			ANGPTL7	1	2.49666	2.17347
			ANK3	1	1.72907	2.62079
			ANKEF1	1	0.0409498	0.023357
			ANKH	1	2.94854	7.94474
			ANKRD1	1	24.9333	6.9644
			ANKRD10	1	1.45397	2.12874
			ANKRD13B	1	0.309927	0.659754
			ANKRD22	1	0.127627	0.116629
			ANKRD29	1	1.64718	0.687771
			ANKRD32	1	0.768438	0.351111
			ANKRD37	1	4.75683	5.65685
			ANKRD42	1	2.88786	3.31728
			ANKRD44	1	3.94493	3.29436
			ANKRD45	1	0.628507	0.395021
			ANO2	1	1.70527	2.07053
			ANO4	1	44.0173	5.06303
			ANP32E	1	2.26577	2.75108
			ANPEP	1	0.50698	0.120742
			ANTXR1	1	4.05584	2.44528
			ANTXR2	1	3.16017	4.34694
			ANXA2	1	0.183011	0.181747
			ANXA4	1	2.11404	2.75108
			ANXA5	1	0.524858	0.441351
			ANXA8	1	0.378929	0.732043
			AOAH	1	2.67586	1.32869
			AOX1	1	0.389582	0.50698
			AP1AR	1	1.89212	0.779165
			AP1B1	1	0.423373	0.403321
			AP1G2	1	0.0660636	0.0160643
			AP3B2	1	2.08493	1.07177
			AP3M1	1	0.80107	0.336808
			AP4B1	1	0.539614	0.19751
			AP4E1	1	1.60214	2.90795
			AP4S1	1	1.8025	2.09943
			AP5S1	1	0.373712	0.429283
			APBA2	1	2.63902	1.05702
			APBB1	1	1.50525	2.11404
			APBB1IP	1	0.236514	0.210224
			APCS	1	2.08493	1.00696
			APEH	1	0.248273	0.303549
			APITD1	1	0.716978	0.45376
			APOA1	1	0.0412346	0.0480273
			APOA1BP	1	0.479632	0.269807
			APOA2	1	0.00254168	0.00136205
			APOE	1	0.562529	0.378929
			APOF	1	10.7034	1
			APOM	1	0.594604	0.420448
			APTX	1	0.646176	0.166086
			AQP1	1	2.42839	2.09943
			AQP10	1	2.12874	1.02101
			AQP11	1	0.456916	0.0717936
			AQP3	1	0.0473661	0.0344345
			AQP4	1	0.00529924	0.00133402
			AQP7	1	0.15932	0.157127
			AQP8	1	0.0219445	0.013139
			AR	1	0.111105	0.0463914
			ARCN1	1	1.86607	2.39496
			ARG2	1	3.75809	2.49666
			ARHGAP12	1	2.17347	0.895025
			ARHGAP15	1	0.773782	0.356013
			ARHGAP20	1	0.211686	0.15932
			ARHGAP25	1	0.233258	0.303549
			ARHGAP26	1	0.450625	0.598739
			ARHGAP28	1	0.466516	0.0629347
			ARHGAP29	1	0.196146	0.273573
			ARHGAP31	1	0.381565	0.408951
			ARHGDIB	1	0.133046	0.0625
			ARHGEF15	1	0.0748424	0.134904
			ARHGEF26	1	0.539614	1.93187
			ARHGEF3	1	0.163799	0.034674
			ARHGEF37	1	0.429283	0.257028
			ARID4A	1	2.12874	2.77022
			ARID4B	1	2.77022	5.09824
			ARL2BP	1	1.37554	0.554785
			ARL3	1	2.41162	1.47427
			ARL4A	1	0.450625	0.566442
			ARL6IP5	1	1.54756	2.11404
			ARMCX2	1	2.69447	1.6358
			ARNT	1	0.712025	1.58008
			ARRDC1	1	0.63728	0.45376
			ARSA	1	0.566442	0.266093
			ARSJ	1	6.54322	5.46416
			ART4	1	0.314253	0.179244
			ASB11	1	2.67586	1.31039
			ASB7	1	0.852635	0.486327
			ASB9	1	0.125869	0.198884
			ASCC2	1	0.550953	0.45376
			ASCC3	1	2.18859	2.20381
			ASH2L	1	0.646176	0.353553
			ASIC1	1	3.01049	2.32947
			ASIP	1	0.659754	1.48452
			ASPA	1	0.0807721	0.0341967
			ASRGL1	1	2.07053	3.38698
			ASXL3	1	4	7.4127
			ATAD2	1	2	2.60268
			ATF1	1	1.81504	2.75108
			ATF3	1	17.7531	8.87656
			ATF7IP2	1	0.356013	0.339151
			ATG16L2	1	7.83536	5.31474
			ATG4A	1	0.493116	0.554785
			ATG4C	1	2.46229	1.79005
			ATG4D	1	0.479632	0.835088
			ATG9A	1	3.53081	1.19748
			ATOH8	1	1.32869	0.586417
			ATP11C	1	2.34567	1.47427
			ATP13A3	1	0.566442	1.18099
			ATP1B1	1	2.73208	0.835088
			ATP1B2	1	12.7286	19.0273
			ATP1B3	1	0.707107	1.60214
			ATP2A2	1	3.68075	7.83536
			ATP2A3	1	3.31728	7.51618
			ATP4A	1	2.36199	2.86791
			ATP5B	1	0.260616	0.373712
			ATP5G3	1	0.463294	0.463294
			ATP5O	1	0.444421	0.423373
			ATP6AP1	1	0.329877	0.363493
			ATP6V0B	1	0.493116	0.312083
			ATP6V0D1	1	0.320856	0.517632
			ATP6V0D2	1	2.20381	5.81589
			ATP7B	1	0.100134	0.0853775
			ATP8B1	1	2.9897	8.1681
			ATPAF1	1	0.466516	0.34151
			ATPIF1	1	2.14355	3.07375
			ATR	1	1.48452	0.524858
			ATRNL1	1	0.200267	0.0688691
			ATRX	1	1.89212	2.28153
			ATXN1	1	3.01049	5.50217
			AUNIP	1	0.395021	0.204476
			AURKA	1	0.295248	0.175556
			AURKB	1	0.233258	0.183011
			AVIL	1	17.7531	1.01396
			AVPR2	1	0.411796	0.332171
			AWAT1	1	0.641713	0.450625
			AWAT2	1	0.309927	0.264255
			AZIN1	1	3.16017	3.75809
			B3GALNT1	1	0.239816	0.0406669
			B3GALTL	1	3.78423	2.32947
			B3GNT2	1	3.63008	4.46915
			B3GNT5	1	0.29937	1.90528
			B4GALNT1	1	0.0987552	0.0940779
			B4GALNT2	1	1.98618	2.18859
			B4GALNT3	1	4.40762	2.92817
			B4GALT4	1	2.21914	3.94493
			B4GALT5	1	2.56685	1.40444
			BAD	1	0.334482	0.208772
			BAG2	1	10.6295	13.737
			BAG3	1	3.65533	8.75435
			BAI3	1	2.25012	0.972655
			BAIAP2L1	1	0.183011	0.312083
			BAMBI	1	8.9383	3.01049
			BANK1	1	0.277392	0.208772
			BATF2	1	0.432269	0.840896
			BAZ1A	1	1.75321	3.36359
			BBOX1	1	0.29937	0.188156
			BBX	1	2.34567	1.70527
			BCAP31	1	0.303549	0.373712
			BCAS4	1	3.94493	2.88786
			BCAT1	1	0.181747	0.157127
			BCHE	1	436.549	504.951
			BCKDHB	1	0.366021	0.301452
			BCL2L1	1	1.82766	4.05584
			BCL2L15	1	0.107321	0.0947323
			BCL6	1	2.01391	4.19887
			BCL7B	1	1.76541	3.89062
			BCL9	1	3.20428	2.11404
			BCO2	1	0.0445016	0.0337259
			BCR	1	0.702222	2.56685
			BDH1	1	0.161544	0.269807
			BDNF	1	23.4254	4.85678
			BEND3	1	1.71713	3.53081
			BEND5	1	2.47942	2.14355
			BEND6	1	4.95883	4.69134
			BGN	1	13.2691	6.06287
			BHLHA9	1	2.31338	1.04972
			BICC1	1	2.46229	1.93187
			BICD1	1	4.34694	27.2843
			BIN3	1	0.574349	1.31951
			BIRC7	1	0.435275	0.650671
			BLK	1	0.246558	0.264255
			BLM	1	0.469761	0.267943
			BLOC1S2	1	0.858565	0.469761
			BLOC1S6	1	2.18859	1.79005
			BLVRB	1	0.41466	0.562529
			BMF	1	8.75435	6.02099
			BMP3	1	0.493116	0.870551
			BMP4	1	2.25012	1.54756
			BMP5	1	0.175556	0.0908733
			BMP7	1	0.0328615	0.0398651
			BMPR1A	1	1.47427	2.02792
			BNIP1	1	0.371131	0.726986
			BNIP3L	1	0.230047	0.189465
			BOC	1	2.42839	1.48452
			BPGM	1	0.150726	0.0217929
			BPHL	1	0.619854	0.429283
			BRCA2	1	0.558644	0.329877
			BRDT	1	0.238159	0.179244
			BRI3BP	1	0.664343	0.400535
			BRINP3	1	1.55833	0.570382
			BRIP1	1	2.20381	2.02792
			BRMS1L	1	3.36359	2.65737
			BSCL2	1	0.732043	0.48971
			BSG	1	0.400535	0.303549
			BST1	1	0.198884	0.0540336
			BTD	1	0.447513	0.234881
			BTG1	1	0.217638	0.366021
			BUB1	1	0.389582	0.132127
			BUB1B	1	0.493116	0.184284
			BVES	1	12.295	14.5203
			BYSL	1	0.411796	1.72907
			BZW2	1	2.36199	1.79005
			C11H5ORF30	1	0.384219	0.15283
			C12H6ORF163	1	3.83706	1.02101
			C12H6ORF165	1	3.27161	1.89212
			C12H6ORF203	1	1.31039	0.650671
			C13H1ORF189	1	0.31864	0.189465
			C13H1ORF192	1	2.08493	1.48452
			C13H1ORF210	1	0.285191	0.493116
			C14H3ORF52	1	42.8137	5.50217
			C15H4ORF26	1	0.266093	0.271684
			C15H4ORF32	1	2.8481	1.8025
			C17H14ORF37	1	3.05252	2.04202
			C18H10ORF120	1	4.92458	4.11246
			C18H10ORF35	1	0.216134	0.687771
			C18H10ORF71	1	0.30566	0.558644
			C19H17ORF53	1	0.397768	0.312083
			C19H17ORF58	1	0.0902456	0.128514
			C1GALT1C1	1	2.17347	1.71713
			C1H11ORF53	1	2.2974	2.41162
			C1H11ORF54	1	0.228458	0.234881
			C1H11ORF57	1	2.21914	2.28153
			C1H9ORF135	1	0.726986	0.275476
			C1H9ORF156	1	0.598739	0.20166
			C1H9ORF40	1	0.463294	0.251739
			C1H9ORF72	1	0.420448	0.697372
			C1QA	1	0.469761	0.251739
			C1QB	1	0.389582	0.392292
			C1QC	1	0.476319	0.248273
			C1QTNF7	1	9.78112	12.5533
			C1QTNF9	1	0.140632	0.178006
			C1RL	1	0.812252	0.447513
			C2	1	0.659754	0.205898
			C20H14ORF1	1	0.217638	0.181747
			C2H2ORF81	1	1.49485	2.51403
			C3	1	0.429283	0.594604
			C3AR1	1	2.21914	2.2974
			C3H5ORF63	1	0.673617	0.15822
			C3H8ORF37	1	2.75108	1.28343
			C4H12ORF10	1	0.659754	0.473029
			C4H12ORF66	1	0.602904	1.27456
			C4H20ORF194	1	0.570382	0.417544
			C4H20ORF26	1	0.258816	0.812252
			C4H20ORF27	1	0.134904	0.123279
			C5H19ORF40	1	0.543367	0.0908733
			C7	1	0.386891	0.0953912
			C7H2ORF76	1	0.50698	0.403321
			C7H2ORF80	1	5.85634	0.933033
			C8A	1	0.307786	0.373712
			C8H12ORF4	1	0.664343	0.316439
			C8H12ORF5	1	3.73213	1.46409
			C8H12ORF57	1	2.15846	1.56917
			C9	1	0.151774	0.285191
			C9H18ORF54	1	1.46409	0.397768
			C9H3ORF14	1	1.82766	0.721965
			C9H3ORF18	1	0.163799	0.217638
			CA1	1	0.133046	0.0115177
			CA13	1	0.149685	0.0871715
			CA2	1	0.162668	0.0118415
			CA4	1	0.0158431	0.023357
			CA5B	1	0.211686	0.360982
			CABLES1	1	0.632878	1.49485
			CABP1	1	2.44528	0.528509
			CACH2C	1	4.14106	7.72749
			CACNA1A	1	0.432269	0.125
			CACNA1C	1	4.53154	5.9794
			CACNA2D1	1	2.07053	2.63902
			CACNB1	1	1.94531	3.38698
			CACNB2	1	8.45614	29.6508
			CACNG3	1	2.58471	1.01396
			CADM1	1	4.75683	3.31728
			CADPS2	1	0.193446	0.0669858
			CALD1	1	5.50217	6.58873
			CALM2	1	2.86791	2.41162
			CALML4	1	0.188156	0.0890031
			CALR3	1	0.712025	0.493116
			CALU	1	1.75321	2.63902
			CAMK1D	1	2.71321	3.65533
			CAMK1G	1	0.417544	1.01396
			CAMK2A	1	0.186856	0.162668
			CAMK2D	1	2.18859	1.87905
			CAMK2G	1	3.11666	1.85318
			CAMKV	1	0.532185	1.12506
			CAMP	1	0.420448	1.79005
			CAND2	1	4.59479	2.49666
			CAP2	1	7.78124	19.5622
			CAPN6	1	0.204476	0.219151
			CAPRIN2	1	1.38511	0.532185
			CAPS	1	0.185565	0.131215
			CAPSL	1	0.183011	0.153893
			CAPZA2	1	1.97247	2.51403
			CARD6	1	0.574349	0.11908
			CASC4	1	2.42839	1.84038
			CASK	1	0.482968	0.444421
			CASP1	1	2.71321	0.768438
			CASP3	1	4.62675	0.790041
			CASP4	1	0.327598	2.01391
			CASP9	1	0.63728	0.408951
			CASQ1	1	0.309927	0.353553
			CASQ2	1	17.7531	44.9422
			CAT	1	0.173139	0.147624
			CATSPER3	1	2.41162	1.03526
			CATSPER4	1	0.266093	0.426317
			CAV2	1	0.417544	0.336808
			CBR1	1	0.248273	0.125
			CBR3	1	0.590496	0.287175
			CBR4	1	0.747425	0.406126
			CBS	1	0.115023	0.142595
			CBY1	1	0.164938	0.444421
			CCBL2	1	0.200267	0.200267
			CCDC102B	1	3.43426	1.45397
			CCDC104	1	2.32947	1.6358
			CCDC109B	1	3.13834	2.05623
			CCDC11	1	0.314253	0.358489
			CCDC110	1	43.1115	15.2422
			CCDC115	1	0.435275	0.482968
			CCDC122	1	0.550953	0.0712977
			CCDC129	1	1.69349	0.619854
			CCDC141	1	1.31951	0.476319
			CCDC142	1	0.562529	0.125
			CCDC152	1	0.363493	0.211686
			CCDC153	1	0.432269	0.183011
			CCDC173	1	1.93187	0.624165
			CCDC176	1	0.615572	1.31039
			CCDC18	1	0.50698	0.25
			CCDC180	1	0.721965	2.09943
			CCDC181	1	1.69349	0.659754
			CCDC3	1	3.86375	5.35171
			CCDC30	1	1.97247	0.870551
			CCDC39	1	3.01049	2.11404
			CCDC42	1	3.20428	2.07053
			CCDC51	1	0.76313	0.351111
			CCDC6	1	4.50023	6.1475
			CCDC62	1	0.463294	0.230047
			CCDC64B	1	0.233258	0.327598
			CCDC68	1	0.876606	0.476319
			CCDC69	1	0.0842021	0.0579118
			CCDC73	1	0.314253	0.752623
			CCDC77	1	0.655197	0.220676
			CCDC8	1	0.420448	0.162668
			CCDC80	1	0.339151	0.111878
			CCDC82	1	2.26577	1.85318
			CCDC88A	1	4.02782	2.46229
			CCDC89	1	2.25012	1.43396
			CCIN	1	0.632878	2.12874
			CCKBR	1	1.60214	2.09943
			CCL19	1	0.198884	2.23457
			CCL21	1	0.246558	0.072293
			CCL5	1	0.0698304	0.11744
			CCL7	1	0.307786	2.26577
			CCNB1	1	0.429283	0.124137
			CCNB1IP1	1	6.27667	4.43828
			CCNB2	1	0.360982	0.0896222
			CCNB3	1	2.49666	2.01391
			CCND3	1	0.243164	0.25
			CCNJ	1	0.48971	0.303549
			CCR10	1	0.11908	0.258816
			CCR2	1	1.97247	2.62079
			CCR8	1	3.09513	6.49802
			CCS	1	0.496546	0.244855
			CCSER1	1	0.438303	1.60214
			CCT3	1	1.52626	2.15846
			CCT6B	1	1.69349	2.31338
			CD101	1	1.40444	0.406126
			CD1B	1	0.650671	0.420448
			CD1D	1	0.279322	0.823591
			CD2	1	0.219151	0.203063
			CD226	1	0.160428	0.100134
			CD247	1	0.00897421	0.00385247
			CD274	1	2.78949	3.83706
			CD34	1	0.102238	0.115023
			CD36	1	0.0308198	0.0382075
			CD37	1	0.426317	0.371131
			CD38	1	0.231647	0.289172
			CD3E	1	0.0883883	0.0295643
			CD3G	1	0.105112	0.0356489
			CD40LG	1	0.190782	0.219151
			CD47	1	0.223756	0.144586
			CD5	1	0.279322	0.124137
			CD59	1	0.41466	0.327598
			CD70	1	0.420448	0.586417
			CD74	1	2.11404	1.77769
			CD79B	1	0.0339605	0.0559391
			CD80	1	2.26577	3.22657
			CD86	1	4.59479	7.4127
			CDC20	1	0.260616	0.133046
			CDC42	1	2.17347	1.23114
			CDC42BPB	1	1.70527	2.53151
			CDC42EP4	1	0.578344	2.69447
			CDC6	1	0.514057	0.312083
			CDCA2	1	0.411796	0.133972
			CDCA5	1	0.426317	0.0807721
			CDCA7	1	0.289172	0.154963
			CDCA7L	1	0.450625	0.257028
			CDCP1	1	0.456916	0.823591
			CDH11	1	3.18215	2.36199
			CDH17	1	1.54756	2.31338
			CDH18	1	0.503478	0.0802141
			CDH19	1	0.768438	1.86607
			CDH8	1	3.03143	3.41054
			CDK1	1	0.646176	0.126745
			CDK14	1	3.53081	5.20537
			CDK17	1	0.641713	1.56917
			CDKL2	1	5.81589	5.57897
			CDKN1A	1	4.05584	3.94493
			CDKN2AIPNL	1	0.619854	0.496546
			CDKN2B	1	1.94531	0.339151
			CDKN2C	1	0.438303	0.291183
			CDKN2D	1	0.251739	1.07923
			CDKN3	1	0.403321	0.231647
			CDO1	1	0.15283	0.147624
			CDON	1	0.190782	0.376312
			CDS1	1	2.92817	0.389582
			CDS2	1	2.56685	7.72749
			CEBPZ	1	1.67018	2.51403
			CEL	1	0.469761	0.668964
			CENPB	1	0.479632	0.716978
			CENPM	1	0.0708052	0.0703162
			CENPP	1	0.138696	0.122428
			CENPT	1	0.779165	0.368567
			CEP120	1	1.86607	2.31338
			CEP162	1	2.96905	1.03526
			CEP19	1	0.547147	0.314253
			CEP192	1	2.94854	3.07375
			CEP41	1	1.56917	2.34567
			CEP57	1	1.45397	2.31338
			CEP97	1	2.28153	1.58008
			CER1	1	0.408951	0.277392
			CER1	1	0.45376	0.926588
			CERS4	1	0.574349	0.444421
			CES3	1	0.368567	0.721965
			CES5A	1	2.28153	2.51403
			CETN1	1	1.76541	0.510506
			CFP	1	0.426317	0.277392
			CGREF1	1	4.89056	2.12874
			CGRRF1	1	0.373712	0.31864
			CH25H	1	2.15846	1.31039
			CHAC1	1	0.517632	1.28343
			CHCHD10	1	0.186856	0.262429
			CHCHD3	1	0.332171	0.389582
			CHD2	1	1.42405	2.01391
			CHD7	1	0.181747	0.423373
			CHDH	1	10.5561	0.986233
			CHEK1	1	0.174343	0.124137
			CHIC1	1	2.2974	1.97247
			CHL1	1	1.71713	0.823591
			CHMP2B	1	2.47942	3.05252
			CHORDC1	1	2.96905	2.39496
			CHP1	1	0.198884	0.0973956
			CHP2	1	0.386891	0.145592
			CHPT1	1	0.45376	0.371131
			CHRD	1	0.479632	1.07177
			CHRNA3	1	8.39773	1.00696
			CHRNA5	1	7.26015	1
			CHST10	1	2.07053	1.3566
			CHST15	1	0.381565	0.320856
			CHST7	1	0.423373	0.303549
			CHSY3	1	11.3924	17.8766
			CIAO1	1	0.514057	0.289172
			CIAPIN1	1	0.486327	0.619854
			CIART	1	0.323088	0.307786
			CIB1	1	0.358489	0.146604
			CIB2	1	0.325335	0.25
			CISD1	1	0.456916	0.183011
			CIT	1	2.77022	4.78991
			CITED1	1	0.381565	0.186856
			CKAP2L	1	0.438303	0.450625
			CKM	1	67.1819	18.0009
			CKMT1B	1	11.7127	1.02101
			CKS2	1	0.535887	0.144586
			CLCA2	1	2.96905	4.59479
			CLCN3	1	0.678302	0.456916
			CLCN6	1	2.34567	1.13288
			CLDN10	1	0.148651	0.104386
			CLDN18	1	6.82108	7.83536
			CLDN3	1	0.5	1.18921
			CLDN5	1	0.073812	0.503478
			CLDN8	1	0.196146	0.198884
			CLEC14A	1	0.143587	0.111105
			CLEC1A	1	0.0890031	0.22688
			CLEC1B	1	0.0660636	0.0120068
			CLEC4E	1	1.43396	0.590496
			CLEC7A	1	3.36359	0.351111
			CLIC4	1	2.9897	4.82323
			CLK4	1	1.67018	2.05623
			CLMN	1	0.0124303	0.0241807
			CLMP	1	0.463294	0.578344
			CLN3	1	0.258816	0.169576
			CLPTM1	1	0.381565	0.482968
			CLSTN2	1	0.411796	0.752623
			CLSTN3	1	4.11246	4.72397
			CLU	1	0.466516	0.130308
			CLVS2	1	1.84038	0.456916
			CLYBL	1	0.378929	0.205898
			CMAS	1	0.673617	0.441351
			CMC1	1	0.790041	0.397768
			CMC2	1	0.376312	0.291183
			CMPK2	1	0.236514	0.712025
			CMTM2	1	0.193446	0.161544
			CMTM5	1	0.190782	0.0994421
			CMTM8	1	0.241484	0.687771
			CNDP2	1	0.423373	0.368567
			CNGA2	1	0.116629	0.314253
			CNGB1	1	2.47942	1.03526
			CNGB3	1	0.615572	1.55833
			CNKSR3	1	5.27803	5.31474
			CNN3	1	1.86607	2.67586
			CNPY2	1	1.91853	0.939523
			CNRIP1	1	0.444421	0.5
			CNTLN	1	2.39496	2.31338
			CNTN1	1	0.320856	0.325335
			CNTN2	1	0.132127	0.353553
			CNTN4	1	2.56685	0.993092
			COASY	1	0.22688	0.411796
			COBLL1	1	4	4.50023
			COCH	1	7.21	4.28709
			COG4	1	0.343885	0.269807
			COG6	1	3.18215	5.09824
			COL12A1	1	3.75809	5.1337
			COL14A1	1	1.89212	0.732043
			COL1A1	1	0.668964	0.14161
			COL21A1	1	12.2101	9.06307
			COL23A1	1	0.244855	0.121582
			COL4A2	1	0.395021	0.435275
			COL4A3	1	0.225313	0.196146
			COL4A4	1	0.554785	0.411796
			COL4A5	1	59.3016	31.3414
			COL5A2	1	1.75321	0.668964
			COL5A3	1	0.0155171	0.0118415
			COL8A1	1	17.7531	16.1113
			COLEC11	1	1.97247	2.46229
			COMMD10	1	0.574349	0.371131
			COMMD7	1	0.426317	0.712025
			COMMD8	1	0.835088	0.496546
			COMMD9	1	0.726986	0.309927
			COPRS	1	0.742262	0.378929
			COPZ1	1	0.590496	0.41466
			COQ2	1	1.59107	0.624165
			COQ5	1	1.46409	0.697372
			COQ6	1	0.238159	0.353553
			COQ9	1	0.269807	0.161544
			CORO1A	1	0.366021	0.269807
			CORO1C	1	2.11404	3.34035
			COTL1	1	2.28153	1.70527
			COX4I1	1	0.366021	0.429283
			CPA5	1	4.50023	5.85634
			CPB1	1	0.0103087	0.00349619
			CPEB4	1	0.348686	0.532185
			CPED1	1	4.72397	8.57419
			CPN2	1	0.389582	0.864537
			CPNE2	1	2.46229	3.31728
			CPNE6	1	4.82323	4.50023
			CPNE8	1	0.389582	0.403321
			CPO	1	0.348686	0.441351
			CPOX	1	0.806642	0.473029
			CPPED1	1	0.496546	0.29937
			CPSF2	1	0.812252	0.493116
			CPT2	1	0.0620683	0.0253829
			CPVL	1	0.244855	0.183011
			CPXM1	1	0.598739	0.5
			CPXM2	1	2.67586	5.89708
			CRABP2	1	0.222211	0.124137
			CREB3L1	1	0.373712	1.22264
			CREB3L4	1	1.77769	0.550953
			CREBL2	1	2.04202	0.463294
			CREBRF	1	1.60214	2.8481
			CRH	1	0.678302	0.320856
			CRIM1	1	2.86791	4.59479
			CRIP3	1	0.29937	0.205898
			CRISPLD1	1	4.75683	1.17283
			CRK	1	0.76313	1.54756
			CRLS1	1	0.417544	0.41466
			CRYBA1	1	0.582367	0.219151
			CRYBA4	1	1.49485	0.602904
			CRYM	1	0.279322	0.162668
			CRYZ	1	0.726986	0.353553
			CS	1	0.320856	0.348686
			CSN2	1	1.67018	2.14355
			CSNK1A1	1	1.87905	2.90795
			CSNK1G1	1	2.37841	1.84038
			CSRNP3	1	2.54912	1.72907
			CSRP1	1	7.67411	12.2101
			CSRP2	1	48.8403	75.5835
			CSRP2BP	1	0.363493	0.257028
			CSTA	1	0.146604	0.160428
			CTC1	1	0.281265	0.386891
			CTDSP2	1	3.22657	1.98618
			CTGF	1	15.0324	53.4456
			CTHRC1	1	0.22688	0.400535
			CTNNA2	1	2.05623	0.97942
			CTNNA3	1	2.51403	1.38511
			CTNS	1	0.493116	0.441351
			CTPS2	1	0.795536	1.71713
			CTSB	1	0.236514	0.243164
			CTSC	1	3.63008	2.94854
			CTSE	1	0.103665	0.0157337
			CTSH	1	0.712025	0.384219
			CTSK	1	3.41054	3.97237
			CTTNBP2	1	2.73208	4.56305
			CUL3	1	1.81504	2.47942
			CWC22	1	2.17347	3.45815
			CWC27	1	2.80889	2.01391
			CX3CL1	1	0.68302	1.69349
			CX3CR1	1	4.50023	0.594604
			CXCL10	1	0.293209	8.81524
			CXHXORF36	1	0.244855	0.22688
			CXXC4	1	5.27803	0.376312
			CYGB	1	0.121582	0.0927827
			CYP27A1	1	0.554785	0.447513
			CYP2A10	1	0.148651	0.0061722
			CYP2B5	1	0.0160643	0.0154099
			CYP2C	1	0.0902456	0.0264608
			CYP2C14	1	6.72717	1.02811
			CYP2C16	1	2.63902	0.823591
			CYP2C30	1	0.11908	0.0717936
			CYP2C4	1	17.1484	1.81504
			CYP2D24	1	0.279322	0.363493
			CYP2G1	1	0.517632	1.16473
			CYP2J1	1	0.806642	0.476319
			CYP3A6	1	2.58471	2.69447
			CYP4A7	1	1.97247	0.697372
			CYP4B1	1	0.389582	0.29937
			CYR61	1	7.83536	6.9644
			CYTIP	1	3.43426	1.33793
			CYTL1	1	5.57897	1.19748
			CYYR1	1	0.0544094	0.0412346
			DAAM2	1	0.460094	0.25349
			DACT1	1	5.61778	2.60268
			DACT2	1	0.103665	0.15822
			DAK	1	0.376312	0.15283
			DAPL1	1	3.36359	3.50642
			DAPP1	1	0.650671	0.381565
			DBI	1	0.406126	0.169576
			DBN1	1	0.356013	0.325335
			DCAF6	1	1.38511	2.11404
			DCAF7	1	0.378929	0.570382
			DCAKD	1	0.444421	0.327598
			DCDC2	1	0.174343	0.426317
			DCLK1	1	2.2974	2.46229
			DCLRE1B	1	0.307786	0.297302
			DCN	1	0.287175	0.0940779
			DCT	1	0.664343	1.64718
			DCTPP1	1	0.784584	0.479632
			DDAH1	1	2.71321	2.65737
			DDHD2	1	2.12874	1.6245
			DDIAS	1	0.737135	0.236514
			DDIT3	1	2.21914	3.86375
			DDX25	1	19.9733	5.09824
			DDX5	1	1.85318	2.69447
			DEK	1	2.2974	3.75809
			DENND2A	1	0.325335	0.400535
			DENND2D	1	0.139661	0.160428
			DEPDC7	1	0.403321	0.283221
			DERA	1	0.466516	0.193446
			DERL2	1	0.716978	0.438303
			DFNB31	1	0.539614	0.269807
			DGAT1	1	0.112656	0.0973956
			DGCR2	1	2.67586	1.17283
			DGKI	1	26.5382	78.7932
			DHCR24	1	0.327598	0.607097
			DHDH	1	0.840896	0.466516
			DHRS1	1	0.297302	0.371131
			DHRS4	1	0.241484	0.168404
			DHRS7	1	0.222211	0.0953912
			DHTKD1	1	0.646176	1.43396
			DHX58	1	0.503478	0.392292
			DIAPH1	1	2.88786	4.72397
			DIAPH2	1	5.16941	7.26015
			DIAPH3	1	4.78991	5.50217
			DIP2C	1	2.23457	3.41054
			DIRC2	1	0.447513	0.784584
			DIS3L	1	0.432269	0.258816
			DISP1	1	0.366021	0.110338
			DIXDC1	1	7.31065	4.85678
			DKC1	1	1.95884	2.14355
			DKK2	1	0.417544	0.0847878
			DKK3	1	12.996	10.7034
			DLEU7	1	0.353553	0.133046
			DLGAP1	1	0.476319	0.76313
			DLST	1	0.277392	0.406126
			DMBX1	1	1.77769	2.54912
			DMRT1	1	0.659754	1.37554
			DMRT2	1	0.00916277	0.00775854
			DMTF1	1	1.51572	2.21914
			DNAH17	1	0.716978	1.56917
			DNAH7	1	2.75108	6.77396
			DNAJA4	1	0.768438	2.01391
			DNAJB4	1	3.86375	0.795536
			DNAJB7	1	0.15283	0.225313
			DNAJB9	1	1.58008	2.86791
			DNAJC12	1	0.476319	0.291183
			DNAJC16	1	0.339151	0.230047
			DNAJC18	1	2.34567	2.09943
			DNAJC19	1	0.82932	0.392292
			DNAJC21	1	2.09943	5.46416
			DNAJC25	1	0.582367	1.18921
			DNAJC27	1	2.18859	1.41421
			DNAJC5G	1	2.2974	0.528509
			DNAL4	1	2.60268	4.16986
			DNASE1L1	1	0.566442	0.368567
			DNASE1L3	1	1.8025	0.835088
			DNTTIP2	1	2.37841	2.82843
			DOCK7	1	3.68075	3.31728
			DOCK8	1	3.38698	2.04202
			DOK5	1	0.562529	0.194791
			DOLK	1	0.400535	0.327598
			DOPEY2	1	0.231647	0.167241
			DPEP2	1	2.51403	1.36604
			DPH2	1	0.539614	0.420448
			DPP3	1	0.373712	0.450625
			DPP4	1	0.697372	0.392292
			DPPA5	1	0.406126	0.535887
			DPT	1	0.0612138	0.0351581
			DPY19L1	1	0.590496	0.444421
			DPYD	1	1.86607	2.09943
			DRAM2	1	0.395021	0.959264
			DSCC1	1	0.562529	2.01391
			DSG4	1	0.00739108	0.00587987
			DSN1	1	0.456916	0.0927827
			DSP	1	0.013697	0.013697
			DTHD1	1	0.179244	0.157127
			DTL	1	0.420448	0.712025
			DTNA	1	24.2515	45.5696
			DTX4	1	0.528509	0.271684
			DUOX2	1	1.47427	2.32947
			DUS2	1	0.514057	0.45376
			DUS4L	1	2.05623	1.86607
			DUSP10	1	0.303549	0.314253
			DUSP26	1	4.37717	3.38698
			DUSP27	1	57.68	35.5062
			DUSP6	1	0.417544	0.773782
			DYNC1I1	1	3.16017	0.61132
			DYNC2LI1	1	1.55833	0.747425
			DYNLL1	1	1.77769	0.858565
			DYNLRB2	1	1.6245	0.673617
			DYNLT1	1	0.386891	0.267943
			DYNLT3	1	2.37841	1.8025
			DYSF	1	0.20733	0.303549
			DZIP1	1	6.45313	3.63008
			DZIP1L	1	0.547147	1.75321
			EARS2	1	1.50525	2.21914
			EBF1	1	0.406126	0.496546
			EBF2	1	0.0674518	0.0250334
			EBF3	1	0.194791	0.264255
			EBP	1	0.0170983	0.0145786
			ECE1	1	0.168404	0.275476
			ECHDC1	1	0.277392	0.137738
			ECHDC2	1	0.129408	0.132127
			ECHDC3	1	0.241484	0.25
			ECHS1	1	0.233258	0.20166
			ECM2	1	0.441351	0.309927
			ECT2	1	0.450625	0.356013
			EDA	1	2.9897	2.8481
			EDIL3	1	27.6652	58.4852
			EDN2	1	0.486327	2.37841
			EDNRA	1	0.768438	1.58008
			EDNRB	1	0.106579	0.14161
			EEF1A2	1	3.94493	0.0511189
			EEPD1	1	0.0349152	0.0162885
			EFCAB2	1	2.01391	2.71321
			EFEMP1	1	3.29436	4.05584
			EFHB	1	0.157127	0.0842021
			EFHD1	1	6.32033	9.18959
			EFNA1	1	0.230047	0.632878
			EFNA3	1	2.01391	1.42405
			EFNB1	1	0.124137	0.167241
			EFR3A	1	2.67586	3.5801
			EFTUD1	1	0.476319	0.517632
			EGFLAM	1	0.0445016	0.0314674
			EGR2	1	1.40444	2.14355
			EGR4	1	0.269807	0.420448
			EHBP1L1	1	2.88786	3.45815
			EHD3	1	0.411796	0.586417
			EHF	1	0.0698304	0.046714
			EIF1B	1	2.01391	1.79005
			EIF2A	1	2.39496	1.77769
			EIF2AK1	1	0.510506	0.260616
			EIF2B2	1	0.447513	0.812252
			EIF4A1	1	0.742262	1.58008
			EIF4E3	1	0.655197	0.48971
			EIF5A	1	0.469761	0.602904
			EIF5A2	1	6.6807	2.58471
			ELAC2	1	0.41466	0.582367
			ELAVL2	1	46.8507	1.01396
			ELAVL4	1	46.5271	0.673617
			ELL2	1	5.1337	7.51618
			ELL3	1	0.246558	0.115023
			ELOVL1	1	0.420448	0.45376
			ELOVL2	1	0.558644	0.476319
			ELOVL4	1	15.1369	11.2356
			ELOVL6	1	0.0669858	0.0415214
			ELTD1	1	0.176777	0.346277
			EMC1	1	0.493116	0.547147
			EML1	1	1.8025	2.69447
			EMP1	1	0.178006	0.183011
			EMX2	1	0.239816	0.301452
			EMX2	1	0.275476	0.532185
			ENDOD1	1	4	5.85634
			ENKD1	1	2.12874	0.309927
			ENKUR	1	2	3.38698
			ENO1	1	0.566442	1.56917
			ENO2	1	0.63728	1.75321
			ENO3	1	0.417544	0.895025
			ENOSF1	1	1.76541	2.08493
			ENOX1	1	0.0960547	0.0356489
			ENPEP	1	3.53081	2.11404
			ENPP3	1	0.189465	0.329877
			ENPP6	1	4.28709	2.37841
			ENTPD3	1	0.539614	0.358489
			ENTPD6	1	2.69447	1.71713
			ENY2	1	1.72907	3.18215
			EPAS1	1	2.71321	9.44794
			EPB41	1	0.316439	0.231647
			EPB41L2	1	0.721965	0.343885
			EPB41L3	1	0.624165	0.291183
			EPB41L5	1	0.262429	0.334482
			EPB42	1	0.146604	0.0493776
			EPC2	1	1.93187	2.25012
			EPHA1	1	0.312083	0.210224
			EPHA3	1	5.54044	3.55537
			EPHA4	1	0.157127	0.0395549
			EPHA7	1	3.03143	2.46229
			EPHB3	1	2.21914	2.37841
			EPHB4	1	0.255253	0.129408
			EPHB6	1	0.650671	1.31951
			EPHX1	1	0.0785633	0.0536603
			EPHX2	1	0.0301855	0.0257372
			EPOR	1	0.20733	0.147624
			ERAL1	1	0.312083	0.219151
			ERAP1	1	0.463294	0.325335
			ERBB2	1	2.32947	1.67018
			ERBB2IP	1	2.34567	3.05252
			ERBB4	1	2.60268	9.12611
			ERF	1	1.6245	2.26577
			ERICH1	1	0.619854	0.351111
			ERICH5	1	1.76541	0.773782
			ERLIN2	1	1.43396	0.429283
			ERMARD	1	0.574349	0.269807
			ERP27	1	0.397768	0.757858
			ERP29	1	0.356013	0.258816
			ESM1	1	0.566442	2
			ESR1	1	0.307786	0.312083
			ESRRA	1	0.403321	0.41466
			ETFA	1	0.166086	0.127627
			ETFB	1	0.314253	0.277392
			ETFDH	1	0.228458	0.216134
			ETNPPL	1	2.21914	3.07375
			ETS1	1	0.486327	1.23114
			ETV1	1	2.11404	4.78991
			ETV3L	1	4.08405	6.49802
			ETV5	1	0.406126	0.517632
			ETV6	1	1.70527	2.63902
			EVA1C	1	2.41162	3.81055
			EVI2A	1	3.65533	0.532185
			EVX1	1	0.236514	0.15932
			EXD1	1	0.220676	0.112656
			EXOC3L1	1	0.225313	0.327598
			EXOC6	1	0.664343	0.381565
			EXOSC2	1	0.429283	0.547147
			EXOSC5	1	0.438303	0.301452
			EYA1	1	5.89708	1.45397
			EZH2	1	0.466516	1.33793
			EZR	1	0.157127	0.179244
			F10	1	3.41054	3.13834
			F11R	1	0.139661	0.169576
			F12	1	0.0480273	0.0486978
			F2	1	1.69349	3.07375
			F2RL1	1	2.26577	1.95884
			F3	1	0.142595	0.466516
			F8	1	0.650671	0.363493
			F9	1	2.75108	1.23114
			F9	1	2.77022	2.31338
			FABP1	1	3.68075	1.15669
			FABP12	1	0.493116	0.920188
			FABP3	1	7.72749	2.82843
			FABP4	1	0.0330318	0.0248605
			FABP9	1	0.112656	0.0927827
			FADS2	1	0.20733	0.840896
			FAM114A1	1	3.31728	2.07053
			FAM124A	1	0.31864	0.812252
			FAM126A	1	0.378929	0.332171
			FAM126B	1	0.655197	1.70527
			FAM129A	1	10.4831	12.7286
			FAM131B	1	8.81524	11.4716
			FAM134C	1	0.655197	0.5
			FAM13A	1	0.105843	0.0328036
			FAM149B1	1	0.795536	0.45376
			FAM150A	1	6.10504	2.09943
			FAM150B	1	23.4254	222.861
			FAM167A	1	0.784584	1.85318
			FAM171A1	1	0.521233	0.400535
			FAM171B	1	4.50023	2.08493
			FAM180B	1	0.406126	0.400535
			FAM181B	1	4.95883	3.38698
			FAM184A	1	5.57897	24.59
			FAM188A	1	2.02792	2.15846
			FAM189A2	1	0.234881	2.62079
			FAM198B	1	2.39496	2.25012
			FAM19A1	1	0.189465	0.126745
			FAM19A4	1	4.99332	9.44794
			FAM208B	1	1.95884	2.78949
			FAM20A	1	3.38698	0.817902
			FAM212A	1	0.336808	0.482968
			FAM213A	1	0.0264608	0.059954
			FAM214B	1	0.594604	0.426317
			FAM216A	1	4.50023	1.04247
			FAM219B	1	2.14355	1.33793
			FAM221A	1	0.175556	0.108819
			FAM221B	1	0.747425	0.200267
			FAM229B	1	0.378929	0.45376
			FAM25A	1	0.578344	1.61328
			FAM3C	1	2.96905	2.67586
			FAM46A	1	6.45313	3.50642
			FAM46B	1	13.1775	3.73213
			FAM46C	1	0.0807721	0.0387409
			FAM49B	1	0.285191	0.336808
			FAM53B	1	0.624165	0.476319
			FAM57A	1	0.562529	0.386891
			FAM65B	1	0.241484	0.25349
			FAM76A	1	0.479632	0.562529
			FAM78A	1	0.246558	0.0438889
			FAM78B	1	0.423373	0.264255
			FAM81A	1	8.75435	2.65737
			FAM84B	1	0.400535	0.521233
			FAM91A1	1	1.95884	3.03143
			FAN1	1	0.450625	0.295248
			FANCG	1	0.726986	0.353553
			FANCL	1	2.02792	0.840896
			FAS	1	2.31338	5.38893
			FAT4	1	2.67586	1.98618
			FAXDC2	1	0.632878	0.486327
			FBLIM1	1	2.96905	1.85318
			FBLN2	1	0.659754	0.343885
			FBLN5	1	3.13834	3.07375
			FBN2	1	2.63902	1.84038
			FBP1	1	0.0310341	0.0426888
			FBP2	1	0.0679209	0.0748424
			FBXL22	1	2.94854	1.87905
			FBXL5	1	0.496546	0.82932
			FBXL8	1	0.358489	0.343885
			FBXO30	1	3.97237	2.36199
			FBXO32	1	7.88986	14.6213
			FBXO33	1	2.12874	2.53151
			FBXO5	1	0.757858	0.34151
			FBXW12	1	4.92458	2.69447
			FCGRT	1	0.570382	0.233258
			FCHSD2	1	3.31728	1.94531
			FCRLA	1	0.112656	0.0934281
			FDFT1	1	0.20166	0.151774
			FDX1	1	0.281265	0.260616
			FECH	1	0.271684	0.135842
			FEN1	1	0.360982	0.307786
			FEZ1	1	2.9897	3.50642
			FFAR2	1	0.0616395	0.0511189
			FGB	1	2.78949	1.86607
			FGD2	1	1.77769	3.5801
			FGD5	1	0.163799	0.291183
			FGF1	1	0.395021	0.358489
			FGF10	1	0.353553	0.517632
			FGF13	1	10.1965	7.1602
			FGF18	1	0.121582	0.116629
			FGF21	1	2.28153	2.96905
			FGF7	1	0.0203335	0.0236831
			FGF9	1	0.435275	0.281265
			FGFR2	1	4.37717	7.06162
			FGG	1	2.05623	0.309927
			FGL1	1	25.1067	2.9897
			FGL2	1	0.373712	1.31951
			FGR	1	0.257028	0.198884
			FHL2	1	1.8025	3.89062
			FHL5	1	0.469761	0.939523
			FHOD1	1	0.737135	0.277392
			FHOD3	1	77.7085	100.427
			FIBIN	1	59.7141	26.5382
			FIG4	1	1.33793	0.624165
			FIGNL1	1	0.752623	0.244855
			FILIP1L	1	5.89708	2.58471
			FKBP11	1	0.496546	0.371131
			FKBP1A	1	0.371131	0.381565
			FKBP1B	1	2.63902	1.68179
			FKBP4	1	0.447513	0.539614
			FKBP5	1	3.65533	16.2234
			FLI1	1	0.34151	0.747425
			FLNA	1	16	14.0257
			FLOT2	1	0.200267	0.307786
			FLRT3	1	0.266093	0.0890031
			FLT1	1	0.301452	0.277392
			FLT4	1	0.174343	0.255253
			FMO1	1	0.360982	0.040386
			FMOD	1	14.8254	30.6965
			FMR1	1	2.07053	2.28153
			FN1	1	10.1261	5.89708
			FN3K	1	0.435275	0.373712
			FN3KRP	1	0.244855	0.15283
			FNDC3B	1	2.20381	4.25748
			FNDC8	1	4.99332	1.00696
			FOS	1	0.386891	5.89708
			FOXK1	1	0.615572	1.25701
			FOXN4	1	19.8353	1.22264
			FOXP1	1	3.94493	6.9644
			FOXRED2	1	0.742262	0.456916
			FPR1	1	0.112656	0.238159
			FRK	1	0.747425	0.332171
			FRMD3	1	0.528509	0.456916
			FRRS1	1	0.167241	0.0698304
			FRRS1L	1	0.426317	0.295248
			FRY	1	2.21914	2.65737
			FRZB	1	5.46416	7.4127
			FSIP1	1	0.052556	0.076415
			FSTL1	1	2.02792	1.33793
			FTL	1	0.273573	0.285191
			FUCA1	1	0.514057	0.429283
			FUCA2	1	2.77022	0.986233
			FUK	1	0.482968	0.168404
			FUNDC1	1	0.768438	0.460094
			FXN	1	0.301452	0.163799
			FYN	1	0.143587	0.111878
			FZD2	1	1.84038	0.835088
			FZD6	1	0.325335	0.482968
			G0S2	1	0.107321	0.0908733
			G3BP2	1	2.14355	1.72907
			G6PD	1	0.0824692	0.0859714
			GAB3	1	0.528509	0.219151
			GABBR2	1	0.514057	0.386891
			GABRA2	1	5.77572	1.02101
			GABRA3	1	7.67411	6.77396
			GABRB2	1	2.51403	1.19748
			GALE	1	0.266093	0.279322
			GALK2	1	0.371131	0.167241
			GALNT12	1	0.486327	0.327598
			GALNT16	1	2.20381	1.26576
			GALNT2	1	3.43426	2.73208
			GALNT3	1	1.93187	3.07375
			GAN	1	0.373712	1.51572
			GAP43	1	9.71356	1.04972
			GAPDHS	1	0.476319	0.882703
			GAREM	1	0.63728	0.360982
			GARNL3	1	2.07053	0.400535
			GAS7	1	0.524858	0.20166
			GATA2	1	0.386891	0.20733
			GATAD2B	1	1.70527	3.01049
			GATC	1	0.539614	0.386891
			GCDH	1	0.204476	0.11744
			GCH1	1	3.24901	3.65533
			GCHFR	1	0.148651	0.0587202
			GCLM	1	0.392292	1.00696
			GCM2	1	0.456916	0.768438
			GCSH	1	0.279322	0.231647
			GDA	1	0.463294	0.514057
			GDAP1L1	1	0.524858	1.30134
			GDF5	1	0.0947323	0.246558
			GDF9	1	0.469761	0.154963
			GDPD1	1	3.97237	0.913831
			GEM	1	9.57983	6.36429
			GFPT2	1	0.0669858	0.143587
			GFRA1	1	5.16941	3.27161
			GGA2	1	0.389582	0.441351
			GGACT	1	0.189465	0.316439
			GGCT	1	0.482968	1.14076
			GGCX	1	0.517632	0.238159
			GGPS1	1	2.51403	1.76541
			GGT7	1	2.90795	3.55537
			GHR	1	0.343885	0.356013
			GIMAP6	1	0.624165	0.493116
			GIPC2	1	0.289172	0.147624
			GJA3	1	0.243164	0.273573
			GJA4	1	0.189465	0.0915054
			GK	1	4.11246	3.45815
			GLDN	1	4.08405	1.97247
			GLIPR1	1	9.64646	17.6305
			GLIS1	1	2.14355	2.34567
			GLIS2	1	2.73208	2.41162
			GLP1R	1	6.49802	8.57419
			GLRX	1	0.336808	0.266093
			GLRX5	1	0.334482	0.183011
			GLS	1	4.31691	6.1475
			GLS2	1	1.7411	2.82843
			GLT8D1	1	1.69349	0.779165
			GLT8D2	1	2.28153	2.12874
			GLTP	1	0.864537	0.460094
			GLUD1	1	0.397768	0.716978
			GLYCTK	1	0.020193	0.0126914
			GMDS	1	2.11404	2.02792
			GMNC	1	0.406126	0.301452
			GMPR2	1	0.486327	0.790041
			GNA12	1	2.08493	0.97942
			GNA15	1	1.53688	0.406126
			GNAZ	1	3.07375	1.17283
			GNB4	1	2.14355	2.54912
			GNPAT	1	0.360982	0.339151
			GNPDA2	1	2.08493	1.93187
			GNPTAB	1	0.547147	0.420448
			GNRH1	1	0.334482	0.0717936
			GOLGA1	1	2.15846	1.69349
			GOLGA3	1	1.40444	2.02792
			GOLIM4	1	4.95883	3.53081
			GOLPH3	1	1.69349	2.15846
			GOLT1B	1	2.09943	2.8481
			GORAB	1	2.02792	1.33793
			GPAM	1	0.303549	0.336808
			GPANK1	1	0.408951	0.400535
			GPC6	1	4.46915	6.06287
			GPI	1	0.157127	0.167241
			GPM6A	1	0.208772	0.211686
			GPM6B	1	4.75683	6.1475
			GPN3	1	5.06303	0.823591
			GPR115	1	3.07375	1
			GPR116	1	0.0540336	0.0708052
			GPR126	1	0.303549	0.204476
			GPR15	1	0.0647041	0.0507658
			GPR160	1	0.220676	0.036906
			GPR176	1	0.381565	2.04202
			GPR182	1	0.469761	0.543367
			GPR183	1	2.36199	0.528509
			GPR37	1	8.81524	12.6407
			GPR45	1	0.659754	1.56917
			GPR56	1	0.15932	0.289172
			GPR64	1	0.164938	0.360982
			GPR75	1	2.58471	2.31338
			GPR82	1	0.104386	0.148651
			GPR87	1	1.67018	2.37841
			GPRASP1	1	2.01391	2.92817
			GPRC5A	1	0.301452	0.907519
			GPRC5C	1	0.161544	0.145592
			GPRC5D	1	0.420448	0.183011
			GPRIN2	1	9.38268	9.00047
			GPSM2	1	5.50217	22.6274
			GPX1	1	0.423373	0.543367
			GPX3	1	0.143587	0.14161
			GRAP	1	0.236514	0.316439
			GRB10	1	0.378929	1.10191
			GRB14	1	77.1717	44.0173
			GREM1	1	2.37841	4.89056
			GRIA3	1	0.147624	0.271684
			GRIA4	1	0.346277	0.707107
			GRID2	1	0.171943	0.368567
			GRINA	1	0.353553	0.267943
			GRK4	1	2.04202	2
			GRK7	1	2.51403	4.14106
			GRO-A	1	0.30566	13.3614
			GRPR	1	0.194791	0.20733
			GRWD1	1	1.6358	2.01391
			GSC	1	0.157127	0.111878
			GSE1	1	0.469761	0.482968
			GSG2	1	0.151774	0.0890031
			GSKIP	1	2.54912	1.48452
			GSN	1	0.238159	0.368567
			GSS	1	0.239816	0.214641
			GSTA4	1	3.55537	3.86375
			GSTM3	1	0.586417	0.406126
			GSTO2	1	0.216134	0.0830429
			GTF2E2	1	2.60268	2.82843
			GTF3C2	1	0.607097	0.30566
			GTPBP10	1	0.732043	0.204476
			GTPBP4	1	1.86607	3.75809
			GTPBP6	1	0.450625	0.590496
			GUCD1	1	0.514057	0.332171
			GUCY1A2	1	0.0743254	0.0575117
			GUCY1B3	1	5.16941	4.08405
			GYS1	1	0.543367	1.1487
			GZMH	1	0.558644	1.18921
			GZMK	1	0.570382	1.15669
			HACL1	1	0.432269	0.543367
			HADH	1	0.100134	0.0890031
			HADHA	1	0.420448	0.378929
			HAL	1	0.291183	0.213159
			HAND2	1	11.7942	4.56305
			HAO2	1	0.303549	0.264255
			HAPLN1	1	25.8125	8.81524
			HARBI1	1	0.441351	0.986233
			HARS2	1	0.812252	0.381565
			HAS3	1	0.343885	0.846745
			HAUS4	1	0.768438	0.463294
			HAUS6	1	0.441351	1.70527
			HBA	1	0.314253	0.0612138
			HBB2	1	0.678302	0.125
			HBEGF	1	0.371131	1.95884
			HBQ1_1	1	0.381565	0.168404
			HCFC2	1	1.53688	2.34567
			HCLS1	1	2.26577	1.04247
			HCN1	1	0.269807	0.200267
			HCRTR1	1	0.343885	0.460094
			HDAC7	1	0.82932	0.384219
			HDC	1	0.110338	0.118257
			HDDC3	1	0.510506	0.104386
			HDGFL1	1	2.15846	1.93187
			HDHD2	1	2.41162	2.21914
			HDX	1	0.790041	1.6358
			HEATR5B	1	0.773782	0.450625
			HEBP1	1	0.5	0.297302
			HECTD2	1	7.6211	29.6508
			HECW2	1	1.61328	0.63728
			HEMGN	1	0.0555527	0.00718897
			HEMK1	1	0.650671	0.257028
			HEPACAM	1	4	6.54322
			HERPUD1	1	0.275476	0.562529
			HERPUD2	1	0.628507	0.476319
			HESX1	1	1.8025	0.795536
			HEXA	1	0.524858	0.373712
			HGF	1	27.4741	14.3204
			HHATL	1	1.95884	0.255253
			HHEX	1	0.327598	0.179244
			HHIP	1	0.283221	0.0463914
			HIATL1	1	0.590496	0.363493
			HIBCH	1	0.469761	0.378929
			HIF1A	1	4.16986	29.2426
			HIGD1B	1	0.059954	0.0429857
			HILPDA	1	0.408951	6.10504
			HIP1	1	5.09824	2.49666
			HIP1R	1	0.210224	0.131215
			HIPK4	1	0.864537	0.456916
			HJURP	1	0.167241	0.167241
			HK1	1	1.97247	3.38698
			HK2	1	0.121582	1.18921
			HK3	1	0.360982	0.547147
			HLCS	1	0.371131	0.131215
			HLX	1	0.167241	0.0908733
			HMBOX1	1	0.432269	0.594604
			HMBS	1	0.309927	0.277392
			HMGCL	1	0.363493	0.406126
			HMGCLL1	1	1.91853	0.835088
			HMGCR	1	0.466516	0.858565
			HMGCS2	1	0.112656	0.0321286
			HMOX2	1	0.503478	1.08673
			HN1	1	2	1.21419
			HNF4G	1	4.19887	3.89062
			HNMT	1	0.602904	0.0575117
			HNRNPH3	1	1.38511	2.08493
			HNRNPLL	1	1.53688	2.07053
			HOMER1	1	1.6358	2.47942
			HOMEZ	1	0.486327	0.301452
			HOPX	1	0.211686	0.307786
			HOXA10	1	2.63902	0.678302
			HOXA11	1	2.90795	1.42405
			HOXA4	1	0.339151	0.389582
			HOXA7	1	0.476319	0.496546
			HOXB1	1	0.586417	0.417544
			HOXB6	1	0.230047	0.303549
			HOXC12	1	0.438303	0.466516
			HOXC4	1	0.167241	0.243164
			HP	1	0.102238	0.858565
			HPD	1	0.737135	0.220676
			HPGD	1	1.68179	0.45376
			HPN	1	0.726986	0.479632
			HPSE2	1	3.53081	3.45815
			HRASLS	1	1.68179	0.76313
			HRASLS5	1	0.0708052	0.0583146
			HRG	1	84.4485	4.59479
			HS1BP3	1	1.94531	0.806642
			HS6ST1	1	0.348686	0.517632
			HS6ST2	1	0.116629	0.116629
			HSD11B1	1	0.153893	0.154963
			HSD11B2	1	0.130308	0.0245183
			HSD17B10	1	0.219151	0.31864
			HSD17B11	1	0.482968	1
			HSD17B12	1	0.138696	0.279322
			HSD17B13	1	0.320856	0.687771
			HSD17B4	1	0.25	0.279322
			HSD3B7	1	0.103665	0.189465
			HSDL2	1	0.420448	0.295248
			HSF1	1	2.14355	2.31338
			HSF2BP	1	0.204476	0.463294
			HSF4	1	0.271684	0.190782
			HSF5	1	0.628507	0.366021
			HSP90AA1	1	1.97247	2.36199
			HSPA12B	1	0.100134	0.0454366
			HSPA13	1	1.65864	3.16017
			HSPA4	1	2.08493	2.2974
			HSPB2	1	7.83536	3.50642
			HSPB6	1	27.0958	25.8125
			HSPB7	1	109.137	216.767
			HSPB9	1	0.590496	1.50525
			HSPD1	1	0.332171	0.473029
			HSPH1	1	3.05252	2.39496
			HTATSF1	1	0.716978	0.469761
			HTR1A	1	1.71713	0.835088
			HTR1B	1	18.6357	50.5626
			HTR2A	1	10.5561	28.0514
			HTR3B	1	5.81589	4.72397
			HTRA4	1	0.371131	0.476319
			HTT	1	0.351111	1.12506
			HUNK	1	1.84038	2.96905
			HUS1B	1	1.6358	0.539614
			HYAL1	1	0.535887	0.48971
			HYAL2	1	0.482968	0.384219
			IAPP	1	3.65533	1.95884
			IBSP	1	0.426317	2.56685
			IBTK	1	2.08493	2.94854
			ICA1	1	0.170755	0.052193
			ICAM-1	1	0.397768	1.43396
			ICMT	1	0.528509	0.34151
			IDH1	1	0.126745	0.0463914
			IDH2	1	0.447513	0.972655
			IDH3A	1	0.438303	0.933033
			IDH3G	1	0.368567	0.562529
			IDNK	1	0.528509	0.31864
			IDO1	1	0.0595399	0.149685
			IFIH1	1	2.44528	1.13288
			IFIT1B	1	0.188156	0.034674
			IFITM5	1	3.20428	0.864537
			IFNG	1	0.521233	0.356013
			IFRD1	1	2.46229	2.60268
			IFRD2	1	0.339151	0.50698
			IFT22	1	0.41466	0.366021
			IFT57	1	0.503478	0.219151
			IFT74	1	2.41162	1.77769
			IFT81	1	3.29436	3.73213
			IGBP1	1	0.574349	0.460094
			IGF1	1	0.123279	0.22688
			IGF1R	1	2.01391	4.14106
			IGF2BP3	1	2.51403	1.8025
			IGF2R	1	2.92817	4.56305
			IGFBP4	1	0.0774817	0.127627
			IGFBP5	1	0.236514	0.0571145
			IGKC2	1	0.15932	0.327598
			IGSF10	1	1.45397	0.668964
			IGSF3	1	3.94493	2.44528
			IGSF8	1	0.211686	0.287175
			IKBKG	1	0.50698	1.18099
			IKZF1	1	0.524858	1.84038
			IKZF3	1	0.0633725	0.0272047
			IL10	1	0.266093	2.75108
			IL10RB	1	0.469761	0.768438
			IL12A	1	0.444421	0.198884
			IL12B	1	0.482968	1.15669
			IL13RA2	1	5.50217	1.23971
			IL16	1	0.5	0.389582
			IL17B	1	43.7133	122.786
			IL17RA	1	0.486327	0.363493
			IL17RB	1	0.615572	1.31039
			IL18BP	1	0.420448	0.840896
			IL1B	1	0.223756	1.17283
			IL1R1	1	0.346277	1.68179
			IL1R2	1	0.219151	0.266093
			IL1RAPL1	1	0.118257	0.0877778
			IL1RL1	1	0.417544	0.211686
			IL22RA1	1	0.429283	0.650671
			IL23A	1	0.435275	0.926588
			IL36RN	1	2.25012	1.01396
			IL5	1	0.303549	0.360982
			IL5	1	0.334482	0.45376
			IL5RA	1	1.82766	2.77022
			IL6ST	1	0.574349	2.75108
			IL7	1	0.327598	0.0836205
			ILK	1	2.15846	2.44528
			IMP4	1	0.400535	0.965936
			IMPA1	1	1.6245	0.590496
			IMPA2	1	0.184284	0.742262
			IMPAD1	1	1.53688	2.02792
			IMPDH1	1	0.10083	0.0616395
			INCENP	1	0.346277	0.291183
			INHA	1	0.712025	0.400535
			INMT	1	0.510506	0.173139
			INO80D	1	1.36604	2.11404
			INPP4A	1	6.45313	28.6408
			INSC	1	3.73213	5.50217
			INSIG1	1	0.0480273	0.103665
			INSL5	1	2.09943	1.19748
			INSRR	1	1.67018	2.58471
			INTS12	1	1.50525	0.716978
			INTU	1	2.05623	0.993092
			INVS	1	0.586417	0.469761
			IP6K2	1	0.493116	0.48971
			IP6K3	1	0.262429	0.503478
			IPO13	1	0.550953	0.482968
			IPO4	1	0.486327	0.835088
			IPO9	1	2.15846	1.43396
			IPPK	1	0.429283	0.806642
			IQCA1	1	0.246558	0.223756
			IQCF3	1	5.02805	7.72749
			IQUB	1	0.234881	0.15932
			IRAK1BP1	1	2.07053	0.535887
			IRAK4	1	0.721965	1.68179
			IRF1	1	0.456916	1.60214
			IRF4	1	0.20166	0.198884
			IRF5	1	2.46229	0.205898
			IRS1	1	0.314253	0.234881
			ISG20L2	1	0.678302	1.65864
			ISM1	1	0.301452	0.31864
			ISOC1	1	0.376312	0.243164
			ITFG2	1	0.295248	0.309927
			ITGA1	1	2.71321	3.13834
			ITGA10	1	20.6776	31.5594
			ITGA2B	1	0.208772	0.101532
			ITGA4	1	0.450625	0.870551
			ITGA6	1	0.204476	0.196146
			ITGA8	1	142.025	227.544
			ITGAE	1	0.550953	0.134904
			ITGAM	1	2	1.10191
			ITGAV	1	3.605	9.64646
			ITGB1	1	4.34694	5.73582
			ITGB1BP2	1	33.3589	29.2426
			ITGB2	1	0.602904	0.351111
			ITGB3BP	1	0.732043	0.45376
			ITGB6	1	1.43396	2.12874
			ITGB7	1	0.283221	0.118257
			ITGB8	1	3.53081	0.882703
			ITIH2	1	4.05584	17.0299
			ITIH3	1	0.0363979	0.0135084
			ITIH4	1	0.535887	4.89056
			ITIH5	1	0.216134	0.29937
			ITM2A	1	0.148651	0.0518325
			ITPKB	1	0.456916	0.450625
			ITPR1	1	3.63008	8.22491
			ITPR2	1	0.343885	0.757858
			ITPR3	1	0.279322	0.167241
			IVD	1	0.10083	0.0896222
			JADE1	1	0.615572	1.47427
			JADE2	1	6.40856	2.69447
			JAG1	1	1.70527	0.742262
			JAGN1	1	0.339151	0.692555
			JAM3	1	2.88786	2.58471
			JPH1	1	7.26015	7.56846
			JPH2	1	16.9123	13.9288
			JUN	1	2.47942	1.06437
			JUP	1	0.151774	0.169576
			KANK3	1	0.0536603	0.0395549
			KANSL1L	1	1.49485	0.460094
			KAT2B	1	0.524858	0.34151
			KATNAL1	1	1.54756	0.737135
			KAZALD1	1	0.277392	0.153893
			KBTBD3	1	1.31039	0.632878
			KCNA1	1	2.82843	4.85678
			KCNA10	1	2.41162	4.59479
			KCNA2	1	9.44794	10.8528
			KCNA3	1	0.400535	0.90125
			KCNA4	1	2.69447	1.10957
			KCNA5	1	3.605	6.45313
			KCNA6	1	3.97237	8.87656
			KCNAB1	1	26.7228	47.1766
			KCNAB3	1	2.46229	0.993092
			KCNB2	1	3.50642	1.85318
			KCNC3	1	0.34151	1.24833
			KCND3	1	1.26576	0.624165
			KCNE3	1	1.98618	0.303549
			KCNE4	1	0.742262	0.356013
			KCNH1	1	1.81504	0.835088
			KCNH2	1	85.0359	66.257
			KCNIP1	1	1.44393	2.32947
			KCNIP4	1	4.99332	1.05702
			KCNJ10	1	0.473029	0.61132
			KCNJ14	1	2.12874	2.36199
			KCNJ3	1	3.36359	1.06437
			KCNJ4	1	0.285191	1.27456
			KCNJ5	1	3.55537	1.09429
			KCNJ8	1	2.44528	1.98618
			KCNK10	1	4.65893	1.41421
			KCNK13	1	2.67586	1.81504
			KCNK2	1	3.55537	0.532185
			KCNK3	1	3.31728	4.72397
			KCNK4	1	0.420448	0.68302
			KCNK9	1	2.18859	1.00696
			KCNMA1	1	21.1121	43.7133
			KCNMB1	1	5.46416	6.72717
			KCNS1	1	2.63902	3.07375
			KCNS3	1	0.233258	0.105843
			KCNT2	1	82.7106	95.6704
			KCTD16	1	7.83536	6.23332
			KCTD19	1	1.39474	2.07053
			KCTD4	1	5.27803	2.75108
			KCTD8	1	29.8571	11.6318
			KDELC2	1	2.18859	1.60214
			KDM2A	1	1.48452	2.09943
			KDM3B	1	1.58008	2.17347
			KDR	1	0.0454366	0.0371627
			KDSR	1	0.411796	0.697372
			KEAP1	1	0.598739	0.447513
			KHK	1	0.233258	0.186856
			KIAA0100	1	0.264255	0.566442
			KIAA1328	1	2.14355	1.00696
			KIAA1377	1	0.628507	3.50642
			KIAA1430	1	1.70527	2.46229
			KIAA1524	1	0.752623	0.486327
			KIAA1549	1	0.435275	0.496546
			KIAA1551	1	0.521233	0.15822
			KIAA1671	1	2.31338	6.9644
			KIAA1715	1	1.81504	3.605
			KIF11	1	0.381565	0.0813339
			KIF15	1	0.835088	0.420448
			KIF18A	1	0.615572	0.450625
			KIF22	1	0.339151	0.114229
			KIF26B	1	6.9644	11.7942
			KIF2C	1	0.312083	0.124137
			KIF3A	1	2.21914	1.09429
			KIF4A	1	0.358489	0.161544
			KIF5A	1	5.93809	1.04972
			KIF5C	1	8.28212	3.53081
			KIF6	1	0.435275	0.539614
			KIFC1	1	0.358489	0.139661
			KITLG	1	0.0908733	0.0960547
			KLB	1	0.0187106	0.0159533
			KLF15	1	0.773782	1.77769
			KLF3	1	0.503478	0.366021
			KLHDC9	1	9.44794	1.07923
			KLHL11	1	1.72907	3.20428
			KLHL13	1	0.514057	0.248273
			KLHL2	1	0.29937	0.386891
			KLHL20	1	2.04202	1.68179
			KLHL25	1	0.426317	0.389582
			KLHL31	1	0.170755	0.168404
			KLHL32	1	7.1602	10.8528
			KLHL6	1	0.503478	0.138696
			KLRG1	1	2.20381	5.27803
			KMO	1	3.29436	4
			KNTC1	1	0.31864	0.112656
			KPNA5	1	2.15846	1.45397
			KPNA7	1	0.423373	0.510506
			KRT19	1	0.046714	0.0281641
			KRT27	1	2.69447	1.84038
			KRT32	1	0.358489	0.712025
			KY	1	3.29436	2.17347
			L2HGDH	1	0.547147	0.325335
			L3MBTL4	1	0.784584	1.81504
			LACE1	1	0.289172	0.190782
			LACTB2	1	0.673617	0.389582
			LAMA2	1	0.678302	0.376312
			LAMA3	1	0.0967228	0.0217929
			LAMP5	1	0.400535	1.08673
			LAMTOR1	1	0.450625	0.264255
			LANCL3	1	0.524858	0.181747
			LAPTM4B	1	0.320856	0.351111
			LARK	1	0.466516	0.550953
			LAYN	1	0.607097	0.316439
			LBH	1	4.19887	4.34694
			LBP	1	0.0255594	0.00306478
			LCA5	1	2.26577	1.04247
			LCAT	1	2.2974	1.67018
			LCK	1	0.0669858	0.0187106
			LCN2	1	0.323088	1.51572
			LCORL	1	0.852635	0.438303
			LCP2	1	1.32869	0.607097
			LDB2	1	0.566442	0.411796
			LDB3	1	1.60214	2.25012
			LDHA	1	0.368567	1.70527
			LDLR	1	0.228458	0.0847878
			LDLRAD4	1	3.11666	4.85678
			LECT1	1	7.26015	3.68075
			LEF1	1	0.594604	1.6245
			LEO1	1	2.34567	2.75108
			LEP	1	0.473029	0.594604
			LEPREL2	1	2.12874	1.52626
			LGALS8	1	1.44393	2.34567
			LGI4	1	0.360982	0.486327
			LGMN	1	0.264255	0.285191
			LGSN	1	0.539614	1.14076
			LHB	1	0.61132	0.482968
			LHFPL5	1	2.08493	1.47427
			LHX4	1	0.742262	1.52626
			LHX6	1	0.314253	0.76313
			LHX8	1	0.0616395	0.0279695
			LIF	1	0.566442	3.63008
			LIFR	1	0.351111	0.473029
			LIG1	1	0.655197	0.291183
			LIMA1	1	2.46229	1.31039
			LIMD1	1	2.20381	1.77769
			LIMD2	1	0.329877	0.233258
			LIN7C	1	2.92817	2.60268
			LINGO4	1	0.486327	0.450625
			LIPA	1	0.15822	0.076415
			LIPF	1	0.127627	0.171943
			LIPH	1	0.517632	1.28343
			LIPJ	1	0.650671	0.185565
			LIPM	1	0.473029	0.632878
			LIX1	1	0.115824	0.00451831
			LMAN2	1	0.68302	0.476319
			LMCD1	1	8.81524	95.6704
			LMNB1	1	0.220676	0.150726
			LMO4	1	3.89062	2.56685
			LMOD1	1	40.7859	30.0647
			LNPEP	1	0.479632	0.721965
			LOC100008716	1	0.220676	0.554785
			LOC100008742	1	0.277392	0.939523
			LOC100008770	1	5.38893	3.41054
			LOC100008796	1	0.0193704	0.823591
			LOC100008810	1	0.812252	1.69349
			LOC100008880	1	0.00287943	0.532185
			LOC100008895	1	93.7015	0.466516
			LOC100008921	1	0.138696	0.020193
			LOC100009097	1	0.368567	0.0529216
			LOC100009168	1	18.2522	221.322
			LOC100009370	1	0.566442	0.316439
			LOC100009439	1	26.7228	35.0174
			LOC100009453	1	3.73213	7.83536
			LOC100009462	1	1.89212	2.20381
			LOC100009551	1	0.032352	0.0162885
			LOC100101568	1	2.28153	2.32947
			LOC100101599	1	1.6245	2.01391
			LOC100101620	1	0.486327	0.323088
			LOC100125980	1	2.73208	1.32869
			LOC100328613	1	0.00988872	0.0100965
			LOC100328624	1	1.68179	2.47942
			LOC100328910	1	0.0250334	0.014082
			LOC100328911	1	0.646176	0.312083
			LOC100328937	1	0.823591	1.68179
			LOC100338201	1	0.594604	1.31039
			LOC100338355	1	0.386891	0.687771
			LOC100338408	1	0.482968	1.93187
			LOC100338430	1	0.381565	2.08493
			LOC100338527	1	2.01391	0.812252
			LOC100338575	1	1.72907	2.37841
			LOC100338621	1	1.85318	2.47942
			LOC100338668	1	2.21914	1.53688
			LOC100338822	1	0.314253	0.241484
			LOC100339205	1	6.10504	4.11246
			LOC100339409	1	1.81504	2.94854
			LOC100339431	1	0.61132	0.389582
			LOC100339500	1	2.14355	1.6358
			LOC100339625	1	4.11246	7.94474
			LOC100339628	1	1.76541	0.702222
			LOC100339718	1	0.105112	0.060371
			LOC100339772	1	0.363493	0.20166
			LOC100340061	1	2.77022	1.58008
			LOC100340294	1	0.646176	1.37554
			LOC100340629	1	1.89212	2.71321
			LOC100340790	1	6.72717	5.50217
			LOC100340858	1	0.132127	0.882703
			LOC100340875	1	0.476319	0.34151
			LOC100340950	1	1.87905	2.05623
			LOC100340967	1	0.327598	0.646176
			LOC100341037	1	2.44528	3.55537
			LOC100341053	1	4.75683	3.81055
			LOC100341153	1	0.411796	0.707107
			LOC100341160	1	0.356013	0.123279
			LOC100341224	1	2.37841	3.73213
			LOC100341232	1	0.295248	0.130308
			LOC100341348	1	0.716978	0.269807
			LOC100341474	1	7.51618	13.8326
			LOC100341499	1	3.50642	0.80107
			LOC100341536	1	0.554785	0.108067
			LOC100342119	1	6.32033	7.01285
			LOC100342234	1	2.9897	2.92817
			LOC100342267	1	0.432269	0.61132
			LOC100342424	1	0.312083	0.145592
			LOC100342597	1	2.18859	2
			LOC100342857	1	0.186856	0.332171
			LOC100342874	1	0.664343	0.400535
			LOC100342879	1	2.44528	0.50698
			LOC100342995	1	0.578344	0.356013
			LOC100343144	1	4.82323	4.53154
			LOC100343277	1	0.271684	0.757858
			LOC100343291	1	0.712025	1.90528
			LOC100343300	1	0.444421	0.0842021
			LOC100343332	1	3.50642	1.65864
			LOC100343913	1	0.397768	1.67018
			LOC100343920	1	0.0669858	0.0238478
			LOC100344258	1	0.646176	0.307786
			LOC100344298	1	1.82766	2.07053
			LOC100344571	1	7.6211	1.8025
			LOC100344592	1	1.53688	2.75108
			LOC100344648	1	1.44393	0.590496
			LOC100344686	1	0.184284	0.389582
			LOC100345309	1	0.0108964	0.00361948
			LOC100345328	1	0.316439	0.450625
			LOC100345356	1	1.65864	2.37841
			LOC100345385	1	0.594604	2.09943
			LOC100345591	1	2.28153	2.09943
			LOC100345657	1	1.79005	0.779165
			LOC100345689	1	5.46416	19.1597
			LOC100345716	1	0.514057	0.167241
			LOC100345807	1	2.96905	1.22264
			LOC100345894	1	0.707107	1.42405
			LOC100345910	1	0.562529	1.33793
			LOC100345989	1	2.15846	1.87905
			LOC100346285	1	2.09943	0.933033
			LOC100346308	1	2.77022	0.45376
			LOC100346348	1	0.678302	1.93187
			LOC100346386	1	3.34035	6.6807
			LOC100346409	1	2.04202	1.00696
			LOC100346416	1	4.40762	2.07053
			LOC100346467	1	0.178006	0.303549
			LOC100346553	1	0.19751	0.112656
			LOC100346587	1	2.34567	2.07053
			LOC100346726	1	0.0847878	0.400535
			LOC100346910	1	0.408951	0.90125
			LOC100346950	1	4.62675	1.45397
			LOC100347368	1	0.806642	0.403321
			LOC100347571	1	0.183011	0.535887
			LOC100347623	1	0.0240137	0.00885066
			LOC100348091	1	0.496546	0.132127
			LOC100348376	1	4.99332	4.05584
			LOC100348443	1	0.0191038	0.019915
			LOC100348758	1	9.25351	8.9383
			LOC100348818	1	4.05584	8.28212
			LOC100348861	1	0.615572	1.27456
			LOC100348967	1	0.632878	1.38511
			LOC100349005	1	0.707107	1.82766
			LOC100349006	1	0.426317	1
			LOC100349066	1	2.18859	1.91853
			LOC100349077	1	4.56305	1.02811
			LOC100349255	1	0.48971	0.371131
			LOC100349303	1	1.84038	2.09943
			LOC100349479	1	1.31039	0.570382
			LOC100349629	1	0.476319	2.65737
			LOC100349667	1	4.22807	2.42839
			LOC100349792	1	0.624165	0.479632
			LOC100349810	1	0.594604	1.98618
			LOC100349830	1	0.550953	0.30566
			LOC100349887	1	4.34694	4.65893
			LOC100349957	1	1.8025	2.65737
			LOC100350060	1	0.45376	1.29235
			LOC100350135	1	0.389582	0.524858
			LOC100350165	1	0.222211	0.346277
			LOC100350168	1	3.05252	2.73208
			LOC100350177	1	6.72717	11.5514
			LOC100350399	1	0.429283	0.30566
			LOC100350431	1	2.12874	2.18859
			LOC100350453	1	0.650671	0.376312
			LOC100350959	1	1.59107	2
			LOC100351057	1	1.69349	2.23457
			LOC100351097	1	0.493116	0.356013
			LOC100351387	1	3.55537	1.64718
			LOC100351828	1	0.712025	0.234881
			LOC100351977	1	3.53081	3.65533
			LOC100352044	1	0.14161	0.0633725
			LOC100352045	1	1.38511	0.444421
			LOC100352100	1	0.550953	0.320856
			LOC100352107	1	2.94854	3.05252
			LOC100352127	1	0.381565	0.0193704
			LOC100352612	1	3.91768	5.1337
			LOC100352628	1	2.05623	2.39496
			LOC100352682	1	2.17347	1.58008
			LOC100352827	1	0.150726	0.0587202
			LOC100352918	1	2.07053	0.852635
			LOC100352971	1	2.32947	0.965936
			LOC100353317	1	0.329877	0.61132
			LOC100353477	1	3.5801	1.54756
			LOC100353536	1	0.381565	0.160428
			LOC100353681	1	1.94531	0.687771
			LOC100353729	1	2.51403	0.939523
			LOC100353741	1	0.598739	0.392292
			LOC100353757	1	0.0758872	0.0273939
			LOC100353981	1	0.678302	0.435275
			LOC100354037	1	10.1261	6.23332
			LOC100354058	1	2.17347	2.25012
			LOC100354204	1	1.6358	2.32947
			LOC100354318	1	0.721965	0.411796
			LOC100354329	1	0.293209	0.503478
			LOC100354734	1	0.15283	0.532185
			LOC100354746	1	2.23457	0.952638
			LOC100354871	1	1.49485	2.08493
			LOC100354896	1	2.11404	1.75321
			LOC100355015	1	0.466516	0.742262
			LOC100355134	1	1.7411	0.550953
			LOC100355323	1	2.11404	1.37554
			LOC100355340	1	0.0908733	0.0177013
			LOC100355412	1	0.615572	0.346277
			LOC100355436	1	0.189465	0.602904
			LOC100355440	1	0.395021	0.170755
			LOC100355645	1	0.381565	0.25
			LOC100356012	1	0.716978	0.373712
			LOC100356044	1	0.460094	0.602904
			LOC100356058	1	0.473029	1.56917
			LOC100356150	1	0.356013	0.244855
			LOC100356242	1	0.5	1.40444
			LOC100356283	1	1.93187	0.840896
			LOC100356321	1	2.26577	1.98618
			LOC100356376	1	0.602904	1.20581
			LOC100356378	1	12.7286	4.11246
			LOC100356444	1	0.68302	0.479632
			LOC100356529	1	0.429283	0.220676
			LOC100356678	1	4.14106	3.81055
			LOC100356715	1	0.510506	1.16473
			LOC100356756	1	0.493116	0.334482
			LOC100356833	1	0.496546	0.697372
			LOC100356864	1	0.420448	0.277392
			LOC100356881	1	0.450625	0.153893
			LOC100356928	1	1.37554	2.02792
			LOC100356976	1	2.34567	1.38511
			LOC100357033	1	0.528509	0.29937
			LOC100357121	1	9.06307	46.8507
			LOC100357372	1	0.628507	0.444421
			LOC100357377	1	0.244855	0.521233
			LOC100357403	1	1.45397	2.05623
			LOC100357419	1	0.00625836	0.00537321
			LOC100357441	1	2	2.96905
			LOC100357474	1	0.517632	0.301452
			LOC100357717	1	6.23332	11.4716
			LOC100357938	1	2.77022	1.09429
			LOC100357943	1	2.18859	2.15846
			LOC100358146	1	1.6358	2.09943
			LOC100358198	1	0.392292	0.0210505
			LOC100358290	1	0.574349	0.429283
			LOC100358455	1	2.15846	2.56685
			LOC100358731	1	0.291183	0.417544
			LOC100358849	1	0.145592	0.697372
			LOC100358851	1	1.61328	0.790041
			LOC100359207	1	4.25748	1.6358
			LOC100359229	1	1.40444	2.05623
			LOC103345397	1	0.742262	1.93187
			LOC103346606	1	0.356013	0.138696
			LOC103347071	1	3.22657	4.16986
			LOC103347173	1	8.45614	11.5514
			LOC103347242	1	2.32947	4.22807
			LOC103347245	1	0.496546	0.320856
			LOC103347493	1	0.469761	1.23971
			LOC103347614	1	0.514057	0.303549
			LOC103347895	1	2.47942	3.29436
			LOC103348254	1	0.314253	0.0638133
			LOC103348594	1	0.590496	0.205898
			LOC103348625	1	1.60214	2.12874
			LOC103349135	1	0.476319	1.07177
			LOC103350907	1	1.90528	2.56685
			LOC103350969	1	1.36604	2.01391
			LOC103351517	1	5.81589	0.287175
			LOC103352134	1	0.429283	0.196146
			LONP2	1	0.371131	0.406126
			LOX	1	4.62675	9.12611
			LOXL2	1	0.0921418	0.0960547
			LOXL3	1	2.75108	3.83706
			LOXL4	1	0.48971	0.876606
			LPCAT2	1	3.27161	0.225313
			LPCAT3	1	0.5	0.870551
			LPHN2	1	1.67018	0.707107
			LPIN3	1	0.590496	2.2974
			LPL	1	0.00123609	0.00103942
			LRCH2	1	2.39496	5.02805
			LRFN2	1	0.0683934	0.0429857
			LRIF1	1	1.81504	0.356013
			LRMP	1	0.460094	0.145592
			LRP2	1	0.139661	0.0473661
			LRP3	1	0.105843	0.170755
			LRP4	1	0.632878	1.91853
			LRRC1	1	2	2.12874
			LRRC16A	1	5.73582	14.0257
			LRRC17	1	1.86607	0.641713
			LRRC28	1	0.423373	0.594604
			LRRC3	1	0.358489	0.0633725
			LRRC36	1	0.678302	0.447513
[truncated: 1,717 more rows]

## Sheet: Cluster 1
		GeneSymbol	AS0	Fold (AS30/AS0)	Fold (AS60/AS0)
		ABCA3	1	0.255253	0.193446
		ABCB1	1	0.456916	0.521233
		ABCC11	1	0.127627	0.148651
		ABHD14B	1	0.432269	0.371131
		ABHD5	1	0.181747	0.264255
		ABLIM3	1	0.0921418	0.138696
		ACAA2	1	0.173139	0.262429
		ACACA	1	0.146604	0.11344
		ACADS	1	0.332171	0.281265
		ACADSB	1	0.543367	0.493116
		ACAT2	1	0.0830429	0.0563282
		ACKR4	1	0.166086	0.166086
		ACSF2	1	0.119908	0.138696
		ACSS2	1	0.0109722	0.0169802
		ACSS3	1	0.0349152	0.0248605
		ACVR1C	1	0.0947323	0.0791098
		ADA	1	0.225313	0.230047
		ADAM12	1	0.211686	0.285191
		ADAM15	1	0.435275	0.503478
		ADAM2	1	0.378929	0.479632
		ADAMTS12	1	0.397768	0.423373
		ADAMTS5	1	0.109576	0.102949
		ADCY4	1	0.127627	0.120742
		ADH2-1	1	0.0216423	0.0277763
		ADI1	1	0.323088	0.417544
		ADIPOQ	1	0.00916277	0.00454974
		ADIPOR2	1	0.0334929	0.0418102
		ADORA1	1	0.0500669	0.0435857
		ADRBK2	1	0.0321286	0.0210505
		AFAP1L1	1	0.125	0.104386
		AGMO	1	0.213159	0.271684
		AGPAT9	1	0.0174576	0.0144779
		AHCY	1	0.339151	0.411796
		AIFM2	1	0.023357	0.0536603
		AK2	1	0.258816	0.223756
		AKR1C5	1	0.222211	0.222211
		ALAS1	1	0.246558	0.236514
		ALDH2	1	0.316439	0.373712
		ALDH3A2	1	0.368567	0.307786
		ALDOC	1	0.0170983	0.00739108
		ALKBH6	1	0.473029	0.432269
		ALKBH7	1	0.444421	0.456916
		ANKEF1	1	0.0409498	0.023357
		ANKRD22	1	0.127627	0.116629
		ANXA2	1	0.183011	0.181747
		AP1B1	1	0.423373	0.403321
		AP5S1	1	0.373712	0.429283
		APBB1IP	1	0.236514	0.210224
		APEH	1	0.248273	0.303549
		APOA1	1	0.0412346	0.0480273
		APOA2	1	0.00254168	0.00136205
		AQP3	1	0.0473661	0.0344345
		AQP7	1	0.15932	0.157127
		AQP8	1	0.0219445	0.013139
		ARHGAP20	1	0.211686	0.15932
		ARHGAP25	1	0.233258	0.303549
		ARHGAP29	1	0.196146	0.273573
		ARHGAP31	1	0.381565	0.408951
		ARHGEF15	1	0.0748424	0.134904
		ASB9	1	0.125869	0.198884
		ATF7IP2	1	0.356013	0.339151
		ATG4A	1	0.493116	0.554785
		ATP5G3	1	0.463294	0.463294
		ATP5O	1	0.444421	0.423373
		ATP6AP1	1	0.329877	0.363493
		ATP7B	1	0.100134	0.0853775
		AURKB	1	0.233258	0.183011
		AWAT2	1	0.309927	0.264255
		B4GALNT1	1	0.0987552	0.0940779
		BCAP31	1	0.303549	0.373712
		BCAT1	1	0.181747	0.157127
		BCKDHB	1	0.366021	0.301452
		BCL2L15	1	0.107321	0.0947323
		BCO2	1	0.0445016	0.0337259
		BLK	1	0.246558	0.264255
		BNIP3L	1	0.230047	0.189465
		BRDT	1	0.238159	0.179244
		C15H4ORF26	1	0.266093	0.271684
		C19H17ORF58	1	0.0902456	0.128514
		C1H11ORF54	1	0.228458	0.234881
		C1QB	1	0.389582	0.392292
		C1QTNF9	1	0.140632	0.178006
		C20H14ORF1	1	0.217638	0.181747
		C4H20ORF27	1	0.134904	0.123279
		C8A	1	0.307786	0.373712
		C9H3ORF18	1	0.163799	0.217638
		CA4	1	0.0158431	0.023357
		CAMK2A	1	0.186856	0.162668
		CAPN6	1	0.204476	0.219151
		CAPS	1	0.185565	0.131215
		CAPSL	1	0.183011	0.153893
		CASK	1	0.482968	0.444421
		CASQ1	1	0.309927	0.353553
		CAT	1	0.173139	0.147624
		CBS	1	0.115023	0.142595
		CCBL2	1	0.200267	0.200267
		CCDC11	1	0.314253	0.358489
		CCDC115	1	0.435275	0.482968
		CCDC64B	1	0.233258	0.327598
		CCDC69	1	0.0842021	0.0579118
		CCL5	1	0.0698304	0.11744
		CCND3	1	0.243164	0.25
		CD2	1	0.219151	0.203063
		CD247	1	0.00897421	0.00385247
		CD34	1	0.102238	0.115023
		CD36	1	0.0308198	0.0382075
		CD37	1	0.426317	0.371131
		CD38	1	0.231647	0.289172
		CD40LG	1	0.190782	0.219151
		CD79B	1	0.0339605	0.0559391
		CDO1	1	0.15283	0.147624
		CENPM	1	0.0708052	0.0703162
		CENPP	1	0.138696	0.122428
		CGRRF1	1	0.373712	0.31864
		CHCHD10	1	0.186856	0.262429
		CHCHD3	1	0.332171	0.389582
		CHEK1	1	0.174343	0.124137
		CHST15	1	0.381565	0.320856
		CIART	1	0.323088	0.307786
		CKAP2L	1	0.438303	0.450625
		CLDN10	1	0.148651	0.104386
		CLDN8	1	0.196146	0.198884
		CLEC14A	1	0.143587	0.111105
		CLMN	1	0.0124303	0.0241807
		CLPTM1	1	0.381565	0.482968
		CMTM2	1	0.193446	0.161544
		CNDP2	1	0.423373	0.368567
		CNRIP1	1	0.444421	0.5
		CNTN1	1	0.320856	0.325335
		COL4A2	1	0.395021	0.435275
		COL4A3	1	0.225313	0.196146
		COL5A3	1	0.0155171	0.0118415
		COX4I1	1	0.366021	0.429283
		CPNE8	1	0.389582	0.403321
		CPO	1	0.348686	0.441351
		CPVL	1	0.244855	0.183011
		CRLS1	1	0.417544	0.41466
		CS	1	0.320856	0.348686
		CSTA	1	0.146604	0.160428
		CTC1	1	0.281265	0.386891
		CTNS	1	0.493116	0.441351
		CTSB	1	0.236514	0.243164
		CXHXORF36	1	0.244855	0.22688
		CYGB	1	0.121582	0.0927827
		CYP2B5	1	0.0160643	0.0154099
		CYP2D24	1	0.279322	0.363493
		CYYR1	1	0.0544094	0.0412346
		DACT2	1	0.103665	0.15822
		DBN1	1	0.356013	0.325335
		DCLRE1B	1	0.307786	0.297302
		DENND2A	1	0.325335	0.400535
		DENND2D	1	0.139661	0.160428
		DGAT1	1	0.112656	0.0973956
		DHRS1	1	0.297302	0.371131
		DMRT2	1	0.00916277	0.00775854
		DNAJB7	1	0.15283	0.225313
		DPP3	1	0.373712	0.450625
		DPT	1	0.0612138	0.0351581
		DSG4	1	0.00739108	0.00587987
		DSP	1	0.013697	0.013697
		DTHD1	1	0.179244	0.157127
		DUS2	1	0.514057	0.45376
		DUSP10	1	0.303549	0.314253
		DYSF	1	0.20733	0.303549
		EBF1	1	0.406126	0.496546
		EBF3	1	0.194791	0.264255
		EBP	1	0.0170983	0.0145786
		ECHDC2	1	0.129408	0.132127
		ECHDC3	1	0.241484	0.25
		ECHS1	1	0.233258	0.20166
		EDNRB	1	0.106579	0.14161
		EFNB1	1	0.124137	0.167241
		EFTUD1	1	0.476319	0.517632
		EGFLAM	1	0.0445016	0.0314674
		EHF	1	0.0698304	0.046714
		ELOVL1	1	0.420448	0.45376
		ELOVL6	1	0.0669858	0.0415214
		EMC1	1	0.493116	0.547147
		EMP1	1	0.178006	0.183011
		EMX2	1	0.239816	0.301452
		EPB41L5	1	0.262429	0.334482
		EPHX1	1	0.0785633	0.0536603
		EPHX2	1	0.0301855	0.0257372
		EPOR	1	0.20733	0.147624
		ESR1	1	0.307786	0.312083
		ESRRA	1	0.403321	0.41466
		ETFA	1	0.166086	0.127627
		ETFB	1	0.314253	0.277392
		ETFDH	1	0.228458	0.216134
		EXOC3L1	1	0.225313	0.327598
		EZR	1	0.157127	0.179244
		F11R	1	0.139661	0.169576
		F12	1	0.0480273	0.0486978
		FABP4	1	0.0330318	0.0248605
		FABP9	1	0.112656	0.0927827
		FAM126A	1	0.378929	0.332171
		FAM180B	1	0.406126	0.400535
		FAM213A	1	0.0264608	0.059954
		FAM229B	1	0.378929	0.45376
		FAM49B	1	0.285191	0.336808
		FAM65B	1	0.241484	0.25349
		FAM76A	1	0.479632	0.562529
		FBP1	1	0.0310341	0.0426888
		FBP2	1	0.0679209	0.0748424
		FBXL8	1	0.358489	0.343885
		FCRLA	1	0.112656	0.0934281
		FDFT1	1	0.20166	0.151774
		FDX1	1	0.281265	0.260616
		FEN1	1	0.360982	0.307786
		FFAR2	1	0.0616395	0.0511189
		FGF1	1	0.395021	0.358489
		FGF18	1	0.121582	0.116629
		FGF7	1	0.0203335	0.0236831
		FGR	1	0.257028	0.198884
		FKBP1A	1	0.371131	0.381565
		FKBP4	1	0.447513	0.539614
		FLOT2	1	0.200267	0.307786
		FLT1	1	0.301452	0.277392
		FLT4	1	0.174343	0.255253
		FN3K	1	0.435275	0.373712
		FSIP1	1	0.052556	0.076415
		FTL	1	0.273573	0.285191
		FYN	1	0.143587	0.111878
		G0S2	1	0.107321	0.0908733
		G6PD	1	0.0824692	0.0859714
		GALE	1	0.266093	0.279322
		GCSH	1	0.279322	0.231647
		GDA	1	0.463294	0.514057
		GGA2	1	0.389582	0.441351
		GHR	1	0.343885	0.356013
		GJA3	1	0.243164	0.273573
		GLRX	1	0.336808	0.266093
		GLYCTK	1	0.020193	0.0126914
		GNPAT	1	0.360982	0.339151
		GPAM	1	0.303549	0.336808
		GPANK1	1	0.408951	0.400535
		GPI	1	0.157127	0.167241
		GPM6A	1	0.208772	0.211686
		GPR116	1	0.0540336	0.0708052
		GPR15	1	0.0647041	0.0507658
		GPR182	1	0.469761	0.543367
		GPR82	1	0.104386	0.148651
		GPRC5C	1	0.161544	0.145592
		GPX3	1	0.143587	0.14161
		GRAP	1	0.236514	0.316439
		GRPR	1	0.194791	0.20733
		GSC	1	0.157127	0.111878
		GSE1	1	0.469761	0.482968
		GSS	1	0.239816	0.214641
		GUCY1A2	1	0.0743254	0.0575117
		HADH	1	0.100134	0.0890031
		HADHA	1	0.420448	0.378929
		HAO2	1	0.303549	0.264255
		HDC	1	0.110338	0.118257
		HIGD1B	1	0.059954	0.0429857
		HJURP	1	0.167241	0.167241
		HMBS	1	0.309927	0.277392
		HMGCL	1	0.363493	0.406126
		HOPX	1	0.211686	0.307786
		HOXA4	1	0.339151	0.389582
		HOXA7	1	0.476319	0.496546
		HOXB6	1	0.230047	0.303549
		HOXC12	1	0.438303	0.466516
		HOXC4	1	0.167241	0.243164
		HRASLS5	1	0.0708052	0.0583146
		HS6ST2	1	0.116629	0.116629
		HSD11B1	1	0.153893	0.154963
		HSD17B10	1	0.219151	0.31864
		HSD17B4	1	0.25	0.279322
		HSD3B7	1	0.103665	0.189465
		HTRA4	1	0.371131	0.476319
		HYAL1	1	0.535887	0.48971
		IFT22	1	0.41466	0.366021
		IGFBP4	1	0.0774817	0.127627
		IGSF8	1	0.211686	0.287175
		IL1R2	1	0.219151	0.266093
		IL1RAPL1	1	0.118257	0.0877778
		IL5	1	0.303549	0.360982
		IMPDH1	1	0.10083	0.0616395
		INCENP	1	0.346277	0.291183
		INSIG1	1	0.0480273	0.103665
		IP6K2	1	0.493116	0.48971
		IQCA1	1	0.246558	0.223756
		IRF4	1	0.20166	0.198884
		ISM1	1	0.301452	0.31864
		ITFG2	1	0.295248	0.309927
		ITGA6	1	0.204476	0.196146
		ITIH5	1	0.216134	0.29937
		ITPKB	1	0.456916	0.450625
		IVD	1	0.10083	0.0896222
		JUP	1	0.151774	0.169576
		KANK3	1	0.0536603	0.0395549
		KDR	1	0.0454366	0.0371627
		KHK	1	0.233258	0.186856
		KIAA1549	1	0.435275	0.496546
		KIF6	1	0.435275	0.539614
		KITLG	1	0.0908733	0.0960547
		KLB	1	0.0187106	0.0159533
		KLHL2	1	0.29937	0.386891
		KLHL25	1	0.426317	0.389582
		KLHL31	1	0.170755	0.168404
		KPNA7	1	0.423373	0.510506
		KRT19	1	0.046714	0.0281641
		LAPTM4B	1	0.320856	0.351111
		LARK	1	0.466516	0.550953
		LGMN	1	0.264255	0.285191
		LINGO4	1	0.486327	0.450625
		LIPF	1	0.127627	0.171943
		LOC100009551	1	0.032352	0.0162885
		LOC100328613	1	0.00988872	0.0100965
		LOC100348443	1	0.0191038	0.019915
		LOC100357419	1	0.00625836	0.00537321
		LONP2	1	0.371131	0.406126
		LOXL2	1	0.0921418	0.0960547
		LRFN2	1	0.0683934	0.0429857
		LRP3	1	0.105843	0.170755
		LSS	1	0.397768	0.48971
		MAGI3	1	0.450625	0.435275
		MALL	1	0.417544	0.426317
		MAMLD1	1	0.11744	0.11908
		MAPK3	1	0.327598	0.285191
		MARCKSL1	1	0.228458	0.239816
		MARCO	1	0.211686	0.228458
		MATN2	1	0.314253	0.289172
		MCM4	1	0.316439	0.411796
		MCM5	1	0.246558	0.185565
		MCOLN1	1	0.167241	0.148651
		MCOLN3	1	0.0356489	0.0366511
		MDFIC	1	0.363493	0.384219
		MEGF9	1	0.463294	0.450625
		MEST	1	0.0374212	0.03983
		MET	1	0.143587	0.179244
		MFAP5	1	0.115023	0.123279
		MGAT5	1	0.528509	0.486327
		MGST1	1	0.0188407	0.0188407
		MKKS	1	0.432269	0.400535
		MLYCD	1	0.493116	0.438303
		MME	1	0.0094859	0.0157337
		MMRN1	1	0.376312	0.460094
		MOGAT2	1	0.105843	0.188156
		MPP1	1	0.373712	0.358489
		MPPE1	1	0.441351	0.463294
		MPZL2	1	0.297302	0.233258
		MRPL49	1	0.287175	0.323088
		MRPL9	1	0.426317	0.397768
		MRPS15	1	0.366021	0.348686
		MRPS18A	1	0.334482	0.273573
		MRS2	1	0.196146	0.148651
		MSMO1	1	0.105112	0.0688691
		MSRB1	1	0.334482	0.366021
		MTHFD1	1	0.244855	0.269807
		MTHFS	1	0.266093	0.371131
		MYH8	1	0.142595	0.15822
		MYO19	1	0.450625	0.469761
		NAPA	1	0.463294	0.558644
		NDST2	1	0.482968	0.528509
		NDUFA10	1	0.334482	0.297302
		NDUFS1	1	0.360982	0.376312
		NDUFS2	1	0.406126	0.426317
		NEBL	1	0.463294	0.469761
		NEDD4L	1	0.307786	0.262429
		NHP2	1	0.389582	0.426317
		NME8	1	0.111878	0.150726
		NOS3	1	0.180491	0.148651
		NOTCH4	1	0.173139	0.231647
		NOX1	1	0.266093	0.20733
		NPC1	1	0.351111	0.447513
		NPR3	1	0.222211	0.31864
		NR5A2	1	0.0665231	0.127627
		NRN1	1	0.271684	0.211686
		NUDT18	1	0.429283	0.384219
		NXPE4	1	0.193446	0.167241
		OCLN	1	0.0902456	0.100134
		OGDH	1	0.403321	0.463294
		OGDHL	1	0.198884	0.173139
		OLFM4	1	0.438303	0.366021
		OLFML1	1	0.138696	0.11744
		PAM	1	0.493116	0.48971
		PARP16	1	0.429283	0.381565
		PASD1	1	0.171943	0.170755
		PBLD	1	0.169576	0.167241
		PCDH1	1	0.115023	0.122428
		PCDH9	1	0.281265	0.363493
		PCK2	1	0.0206173	0.0285572
		PCSK6	1	0.0915054	0.102238
		PCTP	1	0.447513	0.5
		PDE3B	1	0.0953912	0.0698304
		PDE7A	1	0.138696	0.181747
		PDE8A	1	0.312083	0.275476
		PDGFB	1	0.411796	0.41466
		PDHX	1	0.50698	0.48971
		PDRG1	1	0.447513	0.510506
		PDZK1	1	0.119908	0.0785633
		PEAR1	1	0.281265	0.251739
		PECAM1	1	0.173139	0.267943
		PEG3	1	0.0227183	0.0213444
		PENK	1	0.0567199	0.0457527
		PFKFB1	1	0.00537321	0.00312918
		PFKFB4	1	0.0277763	0.0142786
		PGD	1	0.0769465	0.101532
		PGER1	1	0.211686	0.194791
		PHB	1	0.29937	0.371131
		PHGDH	1	0.0559391	0.0376815
		PHKA2	1	0.444421	0.547147
		PHYHD1	1	0.260616	0.348686
		PIGG	1	0.460094	0.528509
		PIP5K1B	1	0.213159	0.186856
		PITHD1	1	0.486327	0.554785
		PIWIL4	1	0.196146	0.163799
		PLA2G16	1	0.105112	0.118257
		PLEK2	1	0.314253	0.381565
		PLEKHF1	1	0.143587	0.217638
		PLVAP	1	0.0607909	0.0540336
		PNMAL1	1	0.423373	0.510506
		POLA2	1	0.420448	0.371131
		POLN	1	0.129408	0.137738
		PON2	1	0.460094	0.460094
		POR	1	0.456916	0.463294
		PPA1	1	0.279322	0.230047
		PPAP2B	1	0.503478	0.441351
		PPARG	1	0.00854917	0.0101667
		PPP1R1A	1	0.0529216	0.107321
		PPP2R5A	1	0.48971	0.535887
		PPT2	1	0.213159	0.19751
		PRCP	1	0.174343	0.255253
		PRDX3	1	0.353553	0.463294
		PRDX6	1	0.384219	0.463294
		PREX2	1	0.122428	0.196146
		PRF1	1	0.198884	0.210224
		PRKAR2B	1	0.0192366	0.0264608
		PRKCH	1	0.192109	0.260616
		PRKCZ	1	0.137738	0.0921418
		PRMT5	1	0.395021	0.332171
		PRNP	1	0.281265	0.251739
		PSMB8	1	0.204476	0.279322
		PSMC3IP	1	0.41466	0.411796
		PTCD1	1	0.423373	0.432269
		PTCH2	1	0.25	0.323088
		PTGER2	1	0.0638133	0.105843
		PTPRF	1	0.535887	0.473029
		PYGM	1	0.257028	0.327598
		QPCTL	1	0.295248	0.29937
		RAB25	1	0.15283	0.150726
		RAB27A	1	0.441351	0.50698
		RAB4B	1	0.420448	0.510506
		RAB5C	1	0.353553	0.323088
		RASGRF2	1	0.0940779	0.0896222
		RASGRP3	1	0.360982	0.400535
		RASSF9	1	0.293209	0.258816
		RBM47	1	0.312083	0.293209
		RDH8	1	0.348686	0.45376
		RERGL	1	0.0110485	0.0134151
		RGCC	1	0.073812	0.075363
		RGMB	1	0.48971	0.510506
		RGS6	1	0.11344	0.115824
		RILP	1	0.131215	0.168404
		RLA-A3	1	0.386891	0.346277
		RLBP1	1	0.198884	0.200267
		RMDN3	1	0.230047	0.217638
		RNASE7	1	0.562529	0.5
		RNF222	1	0.275476	0.297302
		RPP40	1	0.554785	0.493116
		RRM2	1	0.166086	0.127627
		RTKN	1	0.444421	0.411796
		RXRG	1	0.493116	0.590496
		S100A11	1	0.5	0.493116
		S100A12	1	0.0189718	0.0361465
		S100A8	1	0.023357	0.0206173
		S100B	1	0.0836205	0.0500669
		SAMD3	1	0.371131	0.363493
		SCARB1	1	0.22688	0.260616
		SCN1A	1	0.0339605	0.0483614
		SDHAF2	1	0.463294	0.441351
		SDHB	1	0.426317	0.514057
		SDHD	1	0.327598	0.275476
		SDPR	1	0.205898	0.258816
		SELENBP1	1	0.109576	0.103665
		SEMA3G	1	0.360982	0.466516
		SERPINA12	1	0.0813339	0.0807721
		SERPINB11	1	0.29937	0.356013
		SERPINF1	1	0.0865693	0.0927827
		SH3BP5	1	0.521233	0.496546
		SH3GL2	1	0.162668	0.166086
		SHANK2	1	0.220676	0.289172
		SHB	1	0.223756	0.277392
		SHE	1	0.220676	0.246558
		SHMT1	1	0.0356489	0.0275845
		SIRT5	1	0.25349	0.323088
		SIX1	1	0.210224	0.271684
		SIX4	1	0.266093	0.25349
		SLC16A11	1	0.5	0.482968
		SLC16A2	1	0.22688	0.183011
		SLC19A1	1	0.0960547	0.0660636
		SLC19A3	1	0.219151	0.309927
		SLC1A5	1	0.0287559	0.0418102
		SLC22A7	1	0.371131	0.466516
		SLC25A20	1	0.145592	0.153893
		SLC26A3	1	0.153893	0.173139
		SLC27A2	1	0.200267	0.183011
		SLC2A8	1	0.353553	0.312083
		SLC36A2	1	0.00382586	0.00759887
		SLC39A8	1	0.0351581	0.0595399
		SLC44A3	1	0.30566	0.257028
		SLC4A4	1	0.348686	0.432269
		SLC5A3	1	0.275476	0.297302
		SLC6A4	1	0.126745	0.0896222
		SLC8B1	1	0.29937	0.373712
		SLC9A3R2	1	0.186856	0.130308
		SLC9B1	1	0.351111	0.289172
		SLCO5A1	1	0.193446	0.200267
		SLIT3	1	0.234881	0.234881
		SMG9	1	0.444421	0.510506
		SOX17	1	0.312083	0.368567
		SPATA13	1	0.11908	0.183011
		SPATA6	1	0.376312	0.336808
		SPDL1	1	0.463294	0.392292
		SPRY1	1	0.297302	0.30566
		ST3GAL2	1	0.301452	0.266093
		ST8SIA4	1	0.236514	0.175556
		STARD4	1	0.180491	0.149685
		STAT5B	1	0.234881	0.29937
		STK32A	1	0.25	0.196146
		STOX1	1	0.0354026	0.0344345
		SUCLG1	1	0.356013	0.378929
		SVIP	1	0.389582	0.476319
		SYNGR1	1	0.48971	0.562529
		SYTL3	1	0.358489	0.31864
		TAMM41	1	0.432269	0.363493
		TBX15	1	0.133972	0.134904
		TCN1	1	0.0934281	0.111105
		TDP1	1	0.539614	0.482968
		TEX261	1	0.360982	0.316439
		TF	1	0.15283	0.151774
		TGFBR3	1	0.184284	0.267943
		TGOLN2	1	0.435275	0.450625
		THBS3	1	0.360982	0.291183
		THRSP	1	0.00916277	0.00975258
		THSD1	1	0.174343	0.233258
		THSD4	1	0.0953912	0.0679209
		THSD7A	1	0.329877	0.339151
		TKT	1	0.0973956	0.102949
		TM9SF4	1	0.473029	0.521233
		TMBIM1	1	0.406126	0.456916
		TMBIM6	1	0.281265	0.269807
		TMCC2	1	0.31864	0.293209
		TMEM135	1	0.25	0.258816
		TMEM156	1	0.161544	0.160428
		TMEM192	1	0.397768	0.366021
		TMEM199	1	0.441351	0.482968
		TMEM204	1	0.193446	0.194791
		TMEM37	1	0.0225614	0.020193
		TMEM54	1	0.346277	0.417544
		TMEM55B	1	0.510506	0.450625
		TNFRSF17	1	0.222211	0.198884
		TP53INP1	1	0.493116	0.45376
		TPI1	1	0.228458	0.309927
		TPK1	1	0.343885	0.29937
		TPX2	1	0.48971	0.444421
		TRAP1	1	0.260616	0.277392
		TRIM58	1	0.238159	0.204476
		TRIM7	1	0.151774	0.150726
		TRMT1L	1	0.30566	0.356013
		TRPC4AP	1	0.479632	0.48971
		TRUB1	1	0.417544	0.403321
		TSHZ2	1	0.116629	0.098073
		TSPAN12	1	0.222211	0.210224
		TSPAN15	1	0.0830429	0.142595
		TTC36	1	0.0144779	0.00860863
		TTC9	1	0.0674518	0.0514744
		TTLL5	1	0.496546	0.570382
		TTN	1	0.15283	0.184284
		TUBB	1	0.438303	0.378929
		TUBB2B	1	0.441351	0.420448
		TUBE1	1	0.406126	0.444421
		TUBG1	1	0.327598	0.269807
		TXNL4B	1	0.366021	0.438303
		TXNRD3	1	0.190782	0.204476
		UBA7	1	0.482968	0.578344
		UGT1-6	1	0.0674518	0.0454366
		UNC5C	1	0.19751	0.148651
		UPK1B	1	0.0703162	0.0708052
		UROD	1	0.392292	0.403321
		UROS	1	0.469761	0.444421
		USF1	1	0.493116	0.479632
		VASH1	1	0.309927	0.260616
		VLDLR	1	0.0960547	0.0802141
		VPS18	1	0.466516	0.456916
		VSTM4	1	0.320856	0.275476
		VWA2	1	0.192109	0.204476
		VWF	1	0.25349	0.220676
		WBSCR16	1	0.450625	0.408951
		WDR76	1	0.14161	0.181747
		WNT10A	1	0.0836205	0.131215
		WNT2	1	0.0813339	0.0896222
		XAF1	1	0.339151	0.348686
		XDH	1	0.0379436	0.0376815
		XKR4	1	0.241484	0.31864
		XPNPEP1	1	0.291183	0.371131
		YWHAE	1	0.429283	0.447513
		ZDHHC16	1	0.389582	0.450625
		ZMYND12	1	0.476319	0.566442
		ZNF366	1	0.115824	0.0915054
		ZNF423	1	0.239816	0.273573
		ZNF521	1	0.31864	0.348686
		ZNF775	1	0.156041	0.203063
		2016-09-04	1	0.539614	0.460094
		ABHD11	1	0.41466	0.251739
		ABHD14A	1	0.535887	0.438303
		ABHD6	1	0.5	0.339151
		ABI3	1	0.493116	0.376312
		ACE	1	0.14161	0.0583146
		ACOX2	1	0.0303955	0.0108212
		ACSL5	1	0.258816	0.124137
		ADAM6	1	0.528509	0.381565
		ADAMTS16	1	0.075363	0.0387409
		ADCY6	1	0.408951	0.277392
		ADCYAP1	1	0.5	0.397768
		ADH1A	1	0.0358968	0.013697
		AGBL5	1	0.444421	0.25
		AIFM1	1	0.594604	0.417544
		ALAD	1	0.175556	0.0785633
		ALAS2	1	0.0587202	0.0107464
		ALDH1A1	1	0.208772	0.0824692
		ALKBH8	1	0.615572	0.444421
		ANXA5	1	0.524858	0.441351
		AP1G2	1	0.0660636	0.0160643
		APOE	1	0.562529	0.378929
		APOM	1	0.594604	0.420448
		AQP4	1	0.00529924	0.00133402
		AR	1	0.111105	0.0463914
		ARHGDIB	1	0.133046	0.0625
		ARHGEF37	1	0.429283	0.257028
		ART4	1	0.314253	0.179244
		ASCC2	1	0.550953	0.45376
		ASPA	1	0.0807721	0.0341967
		ATP6V0B	1	0.493116	0.312083
		ATPAF1	1	0.466516	0.34151
		ATRNL1	1	0.200267	0.0688691
		AUNIP	1	0.395021	0.204476
		AURKA	1	0.295248	0.175556
		AVPR2	1	0.411796	0.332171
		BAD	1	0.334482	0.208772
		BANK1	1	0.277392	0.208772
		BBOX1	1	0.29937	0.188156
		BMP5	1	0.175556	0.0908733
		BSG	1	0.400535	0.303549
		C13H1ORF189	1	0.31864	0.189465
		C19H17ORF53	1	0.397768	0.312083
		C4H20ORF194	1	0.570382	0.417544
		C7H2ORF76	1	0.50698	0.403321
		CA13	1	0.149685	0.0871715
		CADPS2	1	0.193446	0.0669858
		CALML4	1	0.188156	0.0890031
		CAV2	1	0.417544	0.336808
		CBR1	1	0.248273	0.125
		CCDC152	1	0.363493	0.211686
		CCNJ	1	0.48971	0.303549
		CD226	1	0.160428	0.100134
		CD3E	1	0.0883883	0.0295643
		CD3G	1	0.105112	0.0356489
		CD47	1	0.223756	0.144586
		CD5	1	0.279322	0.124137
		CD59	1	0.41466	0.327598
		CDC20	1	0.260616	0.133046
		CDCA7	1	0.289172	0.154963
		CDCA7L	1	0.450625	0.257028
		CDKN2AIPNL	1	0.619854	0.496546
		CDKN2C	1	0.438303	0.291183
		CDKN3	1	0.403321	0.231647
		CER1	1	0.408951	0.277392
		CERS4	1	0.574349	0.444421
		CFP	1	0.426317	0.277392
		CHP1	1	0.198884	0.0973956
		CHPT1	1	0.45376	0.371131
		CHST7	1	0.423373	0.303549
		CIB2	1	0.325335	0.25
		CLEC1B	1	0.0660636	0.0120068
		CLN3	1	0.258816	0.169576
		CLYBL	1	0.378929	0.205898
		CMC2	1	0.376312	0.291183
		CMTM5	1	0.190782	0.0994421
		COG4	1	0.343885	0.269807
		COL23A1	1	0.244855	0.121582
		COL4A4	1	0.554785	0.411796
		COPZ1	1	0.590496	0.41466
		COQ9	1	0.269807	0.161544
		CORO1A	1	0.366021	0.269807
		CPB1	1	0.0103087	0.00349619
		CPT2	1	0.0620683	0.0253829
		CPXM1	1	0.598739	0.5
		CRABP2	1	0.222211	0.124137
		CRIP3	1	0.29937	0.205898
		CRYM	1	0.279322	0.162668
		CSRP2BP	1	0.363493	0.257028
		CYP27A1	1	0.554785	0.447513
		CYP2C	1	0.0902456	0.0264608
		CYP2C30	1	0.11908	0.0717936
		CYP4B1	1	0.389582	0.29937
		DCAKD	1	0.444421	0.327598
		DEPDC7	1	0.403321	0.283221
		DHRS4	1	0.241484	0.168404
		DHRS7	1	0.222211	0.0953912
		DHX58	1	0.503478	0.392292
		DIS3L	1	0.432269	0.258816
		DNAJC12	1	0.476319	0.291183
		DNAJC16	1	0.339151	0.230047
		DOLK	1	0.400535	0.327598
		DOPEY2	1	0.231647	0.167241
		DPH2	1	0.539614	0.420448
		DPY19L1	1	0.590496	0.444421
		DYNLT1	1	0.386891	0.267943
		EBF2	1	0.0674518	0.0250334
		ECHDC1	1	0.277392	0.137738
		ECM2	1	0.441351	0.309927
		ECT2	1	0.450625	0.356013
		EEPD1	1	0.0349152	0.0162885
		EFHB	1	0.157127	0.0842021
		EIF4E3	1	0.655197	0.48971
		ELL3	1	0.246558	0.115023
		ELOVL2	1	0.558644	0.476319
		ENOX1	1	0.0960547	0.0356489
		ENTPD3	1	0.539614	0.358489
		EPB41	1	0.316439	0.231647
		EPB42	1	0.146604	0.0493776
		EPHA1	1	0.312083	0.210224
		EPHB4	1	0.255253	0.129408
		ERAL1	1	0.312083	0.219151
		ERAP1	1	0.463294	0.325335
		ERP29	1	0.356013	0.258816
		EVX1	1	0.236514	0.15932
		EXD1	1	0.220676	0.112656
		EXOSC5	1	0.438303	0.301452
		FAM134C	1	0.655197	0.5
		FAM13A	1	0.105843	0.0328036
		FAM171A1	1	0.521233	0.400535
		FAM19A1	1	0.189465	0.126745
		FAM214B	1	0.594604	0.426317
		FAM221A	1	0.175556	0.108819
		FAM46C	1	0.0807721	0.0387409
		FAM53B	1	0.624165	0.476319
		FAM57A	1	0.562529	0.386891
		FAM78B	1	0.423373	0.264255
		FAN1	1	0.450625	0.295248
		FAXDC2	1	0.632878	0.486327
		FECH	1	0.271684	0.135842
		FGF9	1	0.435275	0.281265
		FKBP11	1	0.496546	0.371131
		FN3KRP	1	0.244855	0.15283
		FRMD3	1	0.528509	0.456916
		FRRS1	1	0.167241	0.0698304
		FRRS1L	1	0.426317	0.295248
		FUCA1	1	0.514057	0.429283
		FXN	1	0.301452	0.163799
		GABBR2	1	0.514057	0.386891
		GALNT12	1	0.486327	0.327598
		GATA2	1	0.386891	0.20733
		GATC	1	0.539614	0.386891
		GCDH	1	0.204476	0.11744
		GCHFR	1	0.148651	0.0587202
		GIMAP6	1	0.624165	0.493116
		GIPC2	1	0.289172	0.147624
		GJA4	1	0.189465	0.0915054
		GLRX5	1	0.334482	0.183011
		GMNC	1	0.406126	0.301452
		GNPTAB	1	0.547147	0.420448
		GPR126	1	0.303549	0.204476
		GRINA	1	0.353553	0.267943
		GSG2	1	0.151774	0.0890031
		GSTM3	1	0.586417	0.406126
		GSTO2	1	0.216134	0.0830429
		GUCD1	1	0.514057	0.332171
		HAL	1	0.291183	0.213159
		HCN1	1	0.269807	0.200267
		HEMGN	1	0.0555527	0.00718897
		HERPUD2	1	0.628507	0.476319
		HEXA	1	0.524858	0.373712
		HHEX	1	0.327598	0.179244
		HIBCH	1	0.469761	0.378929
		HIP1R	1	0.210224	0.131215
		HLX	1	0.167241	0.0908733
		HMGCS2	1	0.112656	0.0321286
		HOMEZ	1	0.486327	0.301452
		HOXB1	1	0.586417	0.417544
		HSDL2	1	0.420448	0.295248
		HSF4	1	0.271684	0.190782
		HSPA12B	1	0.100134	0.0454366
		HYAL2	1	0.482968	0.384219
		ICA1	1	0.170755	0.052193
		ICMT	1	0.528509	0.34151
		IDH1	1	0.126745	0.0463914
		IFNG	1	0.521233	0.356013
		IGBP1	1	0.574349	0.460094
		IKZF3	1	0.0633725	0.0272047
		IL16	1	0.5	0.389582
		IL17RA	1	0.486327	0.363493
		INVS	1	0.586417	0.469761
		IPO13	1	0.550953	0.482968
		IQUB	1	0.234881	0.15932
		IRS1	1	0.314253	0.234881
		ISOC1	1	0.376312	0.243164
		ITGA2B	1	0.208772	0.101532
		ITGB7	1	0.283221	0.118257
		ITIH3	1	0.0363979	0.0135084
		ITM2A	1	0.148651	0.0518325
		ITPR3	1	0.279322	0.167241
		KAT2B	1	0.524858	0.34151
		KAZALD1	1	0.277392	0.153893
		KCNS3	1	0.233258	0.105843
		KEAP1	1	0.598739	0.447513
		KIF18A	1	0.615572	0.450625
		KLF3	1	0.503478	0.366021
		LACE1	1	0.289172	0.190782
		LAMA3	1	0.0967228	0.0217929
		LAMTOR1	1	0.450625	0.264255
		LBP	1	0.0255594	0.00306478
		LCK	1	0.0669858	0.0187106
		LDB2	1	0.566442	0.411796
		LDLR	1	0.228458	0.0847878
		LHB	1	0.61132	0.482968
		LHX8	1	0.0616395	0.0279695
		LIMD2	1	0.329877	0.233258
		LIPA	1	0.15822	0.076415
		LMNB1	1	0.220676	0.150726
		LOC100101620	1	0.486327	0.323088
		LOC100338822	1	0.314253	0.241484
		LOC100339718	1	0.105112	0.060371
		LOC100339772	1	0.363493	0.20166
		LOC100340875	1	0.476319	0.34151
		LOC100341232	1	0.295248	0.130308
		LOC100342424	1	0.312083	0.145592
		LOC100343920	1	0.0669858	0.0238478
		LOC100345309	1	0.0108964	0.00361948
		LOC100346553	1	0.19751	0.112656
		LOC100347623	1	0.0240137	0.00885066
		LOC100349255	1	0.48971	0.371131
		LOC100349792	1	0.624165	0.479632
		LOC100350399	1	0.429283	0.30566
		LOC100351097	1	0.493116	0.356013
		LOC100352044	1	0.14161	0.0633725
		LOC100352827	1	0.150726	0.0587202
		LOC100353757	1	0.0758872	0.0273939
		LOC100355340	1	0.0908733	0.0177013
		LOC100355645	1	0.381565	0.25
		LOC100356150	1	0.356013	0.244855
		LOC100356756	1	0.493116	0.334482
		LOC100356864	1	0.420448	0.277392
		LOC100358290	1	0.574349	0.429283
		LOC103347245	1	0.496546	0.320856
		LRP2	1	0.139661	0.0473661
		LRRC3B	1	0.0486978	0.0211969
		LRRN1	1	0.133046	0.040386
		LRWD1	1	0.426317	0.339151
		LSAMP	1	0.160428	0.0708052
		LYN	1	0.646176	0.48971
		M6PR	1	0.463294	0.366021
		MARCKS	1	0.258816	0.170755
		MDH1	1	0.493116	0.403321
		MDH2	1	0.34151	0.243164
		MECR	1	0.63728	0.48971
		MEOX1	1	0.366021	0.20733
		MEPCE	1	0.624165	0.479632
		METTL1	1	0.619854	0.486327
		MFNG	1	0.220676	0.0758872
		MFSD11	1	0.381565	0.241484
		MIEN1	1	0.607097	0.432269
		MIPEP	1	0.363493	0.289172
		MMP28	1	0.205898	0.145592
		MOK	1	0.550953	0.450625
		MOSPD3	1	0.650671	0.486327
		MPST	1	0.447513	0.260616
		MRC1	1	0.574349	0.496546
		MREG	1	0.463294	0.297302
		MRPL3	1	0.524858	0.363493
		MRPL48	1	0.397768	0.287175
		MRPS36	1	0.624165	0.469761
		MTMR14	1	0.496546	0.339151
		MTURN	1	0.510506	0.366021
		MYO10	1	0.307786	0.151774
		MYOC	1	0.153893	0.0813339
		NAGA	1	0.554785	0.386891
		NANS	1	0.373712	0.225313
		NCAM2	1	0.641713	0.482968
		NCAPD2	1	0.403321	0.327598
		NCAPH	1	0.50698	0.406126
		NDST1	1	0.41466	0.329877
		NDUFA7	1	0.554785	0.426317
		NDUFA8	1	0.517632	0.373712
		NDUFB8	1	0.417544	0.30566
		NDUFS3	1	0.615572	0.438303
		NEK2	1	0.243164	0.153893
		NEK8	1	0.586417	0.41466
		NIPAL3	1	0.624165	0.493116
		NIT1	1	0.289172	0.220676
		NME6	1	0.45376	0.336808
		NMRK1	1	0.301452	0.173139
		NOL3	1	0.392292	0.293209
		NOVA1	1	0.0733022	0.0344345
		NPC2	1	0.285191	0.211686
		NR1H3	1	0.373712	0.29937
		NRGN	1	0.255253	0.189465
		NSMAF	1	0.50698	0.34151
		NTM	1	0.244855	0.107321
		NUMB	1	0.482968	0.356013
		ORAI1	1	0.283221	0.211686
		OSBPL7	1	0.479632	0.332171
		OSCP1	1	0.532185	0.346277
		OTUB2	1	0.262429	0.168404
		PAK7	1	0.348686	0.244855
		PALMD	1	0.373712	0.258816
		PAMR1	1	0.0780207	0.0328036
		PANK3	1	0.456916	0.271684
		PAOX	1	0.547147	0.363493
		PAPD5	1	0.590496	0.486327
		PARP9	1	0.607097	0.469761
		PCDH10	1	0.0859714	0.0224056
		PDHB	1	0.539614	0.373712
		PEX11G	1	0.289172	0.143587
		PGLYRP1	1	0.0960547	0.0486978
		PGRMC1	1	0.554785	0.373712
		PIPOX	1	0.291183	0.200267
		PLBD2	1	0.482968	0.343885
		PLCG2	1	0.384219	0.267943
		PLTP	1	0.327598	0.25349
		PNPO	1	0.547147	0.366021
		PODXL	1	0.0915054	0.0243489
		POLL	1	0.590496	0.444421
		POLR3C	1	0.469761	0.279322
		POLR3G	1	0.336808	0.241484
		PON3	1	0.162668	0.0769465
		POU2F3	1	0.408951	0.30566
		PPARGC1B	1	0.22688	0.0890031
		PPIC	1	0.578344	0.476319
		PPM1H	1	0.395021	0.233258
		PPP1CA	1	0.586417	0.408951
		PPP1R35	1	0.590496	0.466516
		PRMT2	1	0.659754	0.496546
		PROM1	1	0.0451228	0.00929068
		PRR11	1	0.25349	0.134904
		PRTFDC1	1	0.314253	0.183011
		PSAT1	1	0.0116785	0.00161976
		PTGR1	1	0.133046	0.0547879
		PTPLB	1	0.496546	0.384219
		PTRHD1	1	0.632878	0.482968
		PXMP2	1	0.173139	0.0836205
		PXMP4	1	0.189465	0.11908
		RAB11FIP1	1	0.133972	0.0656073
		RAD51	1	0.395021	0.228458
		RAD51AP1	1	0.624165	0.496546
		RALY	1	0.547147	0.476319
		RAPGEF4	1	0.566442	0.45376
		RASGRP1	1	0.239816	0.15932
		RBCK1	1	0.578344	0.456916
		RDH11	1	0.615572	0.469761
		REEP4	1	0.208772	0.0927827
		REM1	1	0.297302	0.134904
		RFC5	1	0.423373	0.233258
		RFT1	1	0.473029	0.348686
		RGS18	1	0.179244	0.123279
		RHCG	1	0.269807	0.188156
		RHPN2	1	0.514057	0.381565
		RIC8A	1	0.554785	0.435275
		RNF125	1	0.476319	0.384219
		RNPEPL1	1	0.543367	0.358489
		ROBO4	1	0.14161	0.0583146
		RRAGC	1	0.607097	0.426317
		S100A10	1	0.216134	0.112656
		SC5D	1	0.297302	0.179244
		SELL	1	0.036906	0.00491021
		SEMA6A	1	0.273573	0.148651
		SGOL1	1	0.281265	0.116629
		SH2D1A	1	0.173139	0.112656
		SHCBP1	1	0.34151	0.171943
		SHPK	1	0.255253	0.166086
		SKA1	1	0.314253	0.194791
		SKAP1	1	0.0733022	0.0310341
		SLC15A2	1	0.14161	0.0401071
		SLC15A3	1	0.479632	0.351111
		SLC16A10	1	0.368567	0.241484
		SLC16A12	1	0.144586	0.0953912
		SLC27A3	1	0.228458	0.126745
		SLC46A3	1	0.482968	0.314253
		SLC4A11	1	0.356013	0.211686
		SLC9A3R1	1	0.408951	0.233258
		SMDT1	1	0.550953	0.371131
		SNTB1	1	0.0683934	0.0220971
		SPG21	1	0.496546	0.346277
		SPON1	1	0.392292	0.233258
		SPR	1	0.400535	0.30566
		SRGAP1	1	0.314253	0.200267
		STAC	1	0.432269	0.289172
		STOM	1	0.456916	0.31864
		STON2	1	0.160428	0.0555527
		SUMF2	1	0.417544	0.257028
		TBCK	1	0.510506	0.353553
		TCF19	1	0.314253	0.194791
		TFB1M	1	0.594604	0.432269
		TGFBR2	1	0.447513	0.351111
		THOC5	1	0.570382	0.5
		THTPA	1	0.45376	0.348686
		THY1	1	0.174343	0.0708052
		TIMP4	1	0.0896222	0.0486978
		TLCD1	1	0.386891	0.301452
		TM4SF18	1	0.205898	0.133046
		TMCC1	1	0.397768	0.234881
		TMCO4	1	0.203063	0.0953912
		TMEM14C	1	0.48971	0.312083
		TMEM164	1	0.271684	0.19751
		TMEM185A	1	0.586417	0.45376
		TMEM88	1	0.378929	0.248273
		TMEM98	1	0.392292	0.283221
		TMTC2	1	0.586417	0.476319
		TP53I3	1	0.194791	0.122428
		TPCN1	1	0.386891	0.217638
		TPPP	1	0.223756	0.147624
		TRAPPC4	1	0.258816	0.120742
		TREML1	1	0.0733022	0.0172173
		TRPV2	1	0.309927	0.161544
		TSFM	1	0.558644	0.466516
		TSPAN13	1	0.169576	0.0698304
		TSPO	1	0.222211	0.114229
		TTI1	1	0.460094	0.376312
		TTLL1	1	0.444421	0.262429
		TUBAL3	1	0.348686	0.193446
		TUBGCP4	1	0.570382	0.420448
		TXNRD2	1	0.486327	0.356013
		UBE2T	1	0.275476	0.147624
		UCP2	1	0.307786	0.175556
		UNG	1	0.550953	0.435275
		UQCRQ	1	0.285191	0.210224
		YIPF3	1	0.384219	0.29937
		ZAP70	1	0.126745	0.0314674
		ZFYVE20	1	0.503478	0.389582
		ZNF428	1	0.524858	0.373712
		ZPBP	1	0.5	0.417544
		2016-03-08	1	0.707107	0.309927
		ABCA9	1	0.574349	0.0679209
		ABCD4	1	0.646176	0.275476
		ABHD12	1	0.594604	0.285191
		ACE-1	1	0.213159	0.00961832
		ACP5	1	0.521233	0.151774
		ACVR2A	1	0.726986	0.444421
		ADHFE1	1	0.664343	0.356013
		ALG10	1	0.716978	0.386891
		ALG8	1	0.76313	0.267943
		ANKRD32	1	0.768438	0.351111
		ANPEP	1	0.50698	0.120742
		AP3M1	1	0.80107	0.336808
		AP4B1	1	0.539614	0.19751
		APTX	1	0.646176	0.166086
		AQP11	1	0.456916	0.0717936
		ARHGAP15	1	0.773782	0.356013
		ARHGAP28	1	0.466516	0.0629347
		ASB7	1	0.852635	0.486327
		BLOC1S2	1	0.858565	0.469761
		C1H9ORF135	1	0.726986	0.275476
		C1H9ORF156	1	0.598739	0.20166
		C1RL	1	0.812252	0.447513
		C2	1	0.659754	0.205898
		C3H5ORF63	1	0.673617	0.15822
		C5H19ORF40	1	0.543367	0.0908733
		C7	1	0.386891	0.0953912
		C8H12ORF4	1	0.664343	0.316439
		CA2	1	0.162668	0.0118415
		CACNA1A	1	0.432269	0.125
		CARD6	1	0.574349	0.11908
		CBR4	1	0.747425	0.406126
		CCDC122	1	0.550953	0.0712977
		CCDC142	1	0.562529	0.125
		CCDC51	1	0.76313	0.351111
		CCDC68	1	0.876606	0.476319
		CCDC77	1	0.655197	0.220676
		CCNB1	1	0.429283	0.124137
		CDCA5	1	0.426317	0.0807721
		CDH18	1	0.503478	0.0802141
		CDK1	1	0.646176	0.126745
		CENPT	1	0.779165	0.368567
		CKS2	1	0.535887	0.144586
		CLU	1	0.466516	0.130308
		CMC1	1	0.790041	0.397768
		COL1A1	1	0.668964	0.14161
		COMMD8	1	0.835088	0.496546
		COMMD9	1	0.726986	0.309927
		COPRS	1	0.742262	0.378929
		CPOX	1	0.806642	0.473029
		CPSF2	1	0.812252	0.493116
		CRH	1	0.678302	0.320856
		CRYBA1	1	0.582367	0.219151
		CRYZ	1	0.726986	0.353553
		CTSH	1	0.712025	0.384219
		CYP2A10	1	0.148651	0.0061722
		CYP2J1	1	0.806642	0.476319
		DCTPP1	1	0.784584	0.479632
		DDIAS	1	0.737135	0.236514
		DERL2	1	0.716978	0.438303
		DHDH	1	0.840896	0.466516
		DKK2	1	0.417544	0.0847878
		DNAJC19	1	0.82932	0.392292
		DOK5	1	0.562529	0.194791
		DPP4	1	0.697372	0.392292
		DSN1	1	0.456916	0.0927827
		EPB41L2	1	0.721965	0.343885
		EPB41L3	1	0.624165	0.291183
		FAM149B1	1	0.795536	0.45376
		FAM221B	1	0.747425	0.200267
		FANCG	1	0.726986	0.353553
		FBLN2	1	0.659754	0.343885
		FBXO5	1	0.757858	0.34151
		FCGRT	1	0.570382	0.233258
		FHOD1	1	0.737135	0.277392
		FIGNL1	1	0.752623	0.244855
		FMO1	1	0.360982	0.040386
		FOXRED2	1	0.742262	0.456916
		FRK	1	0.747425	0.332171
		FUK	1	0.482968	0.168404
		FUNDC1	1	0.768438	0.460094
		GAS7	1	0.524858	0.20166
		GDF9	1	0.469761	0.154963
		GLTP	1	0.864537	0.460094
		GNRH1	1	0.334482	0.0717936
		GTPBP10	1	0.732043	0.204476
		HARS2	1	0.812252	0.381565
		HAUS4	1	0.768438	0.463294
		HBA	1	0.314253	0.0612138
		HBB2	1	0.678302	0.125
		HDAC7	1	0.82932	0.384219
		HDDC3	1	0.510506	0.104386
		HEATR5B	1	0.773782	0.450625
		HEMK1	1	0.650671	0.257028
		HHIP	1	0.283221	0.0463914
		HIPK4	1	0.864537	0.456916
		HNMT	1	0.602904	0.0575117
		HPD	1	0.737135	0.220676
		INHA	1	0.712025	0.400535
		INMT	1	0.510506	0.173139
		ITGAE	1	0.550953	0.134904
		ITGB3BP	1	0.732043	0.45376
		KCNE4	1	0.742262	0.356013
		KIAA1524	1	0.752623	0.486327
		KIAA1551	1	0.521233	0.15822
		KIF11	1	0.381565	0.0813339
		KIF15	1	0.835088	0.420448
		KLHL6	1	0.503478	0.138696
		LAMA2	1	0.678302	0.376312
		LANCL3	1	0.524858	0.181747
		LCORL	1	0.852635	0.438303
		LIG1	1	0.655197	0.291183
		LIPJ	1	0.650671	0.185565
		LIX1	1	0.115824	0.00451831
		LOC100009097	1	0.368567	0.0529216
		LOC100328911	1	0.646176	0.312083
		LOC100341348	1	0.716978	0.269807
		LOC100341536	1	0.554785	0.108067
		LOC100343300	1	0.444421	0.0842021
		LOC100344258	1	0.646176	0.307786
		LOC100345716	1	0.514057	0.167241
		LOC100347368	1	0.806642	0.403321
		LOC100348091	1	0.496546	0.132127
		LOC100351828	1	0.712025	0.234881
		LOC100352127	1	0.381565	0.0193704
		LOC100354318	1	0.721965	0.411796
		LOC100356012	1	0.716978	0.373712
		LOC100358198	1	0.392292	0.0210505
		LOC103348594	1	0.590496	0.205898
		LRMP	1	0.460094	0.145592
		LRRC3	1	0.358489	0.0633725
		LYPLAL1	1	0.562529	0.11908
		MAP2K6	1	0.712025	0.180491
		MCEE	1	0.554785	0.186856
		MCM8	1	0.664343	0.149685
		MGME1	1	0.624165	0.291183
		MMACHC	1	0.562529	0.251739
		MMP9	1	0.687771	0.200267
		MMS22L	1	0.550953	0.217638
		MTERF	1	0.779165	0.266093
		MTMR4	1	0.646176	0.15822
		NCAPG	1	0.602904	0.136787
		NCAPG2	1	0.726986	0.314253
		NDC80	1	0.641713	0.143587
		NDUFAF1	1	0.768438	0.378929
		NDUFB6	1	0.726986	0.450625
		NEK3	1	0.773782	0.295248
		NUDT2	1	0.659754	0.291183
		NUDT5	1	0.737135	0.323088
		OBFC1	1	0.697372	0.386891
		ORMDL2	1	0.532185	0.204476
		OTC	1	0.697372	0.205898
		PCGF1	1	0.737135	0.251739
		PCYOX1	1	0.768438	0.473029
		PEX7	1	0.790041	0.476319
		PIEZO2	1	0.558644	0.124137
		PIK3R6	1	0.397768	0.0507658
		POLE	1	0.219151	0.0107464
		POMT2	1	0.578344	0.222211
		PPCDC	1	0.632878	0.223756
		PPIL6	1	0.406126	0.0571145
		PRIMPOL	1	0.742262	0.444421
		PRPSAP2	1	0.594604	0.262429
		PTGFR	1	0.757858	0.239816
		PTN	1	0.386891	0.019915
		RAD51D	1	0.716978	0.271684
		RAPGEF2	1	0.562529	0.223756
		RHBDL3	1	0.76313	0.400535
		RMND1	1	0.574349	0.133972
		RNF135	1	0.574349	0.102949
		RNLS	1	0.493116	0.15932
		ROGDI	1	0.582367	0.216134
		RPUSD2	1	0.812252	0.334482
		SASS6	1	0.50698	0.183011
		SCIN	1	0.432269	0.116629
		SDR39U1	1	0.707107	0.19751
		SEPP1	1	0.476319	0.148651
		SERPINB10	1	0.371131	0.0206173
		SFRP2	1	0.678302	0.216134
		SIGLEC1	1	0.406126	0.0847878
		SKP2	1	0.864537	0.45376
		SLC10A5	1	0.570382	0.193446
		SLC35D2	1	0.726986	0.277392
		SLC9A7	1	0.858565	0.463294
		SNAP29	1	0.784584	0.406126
		SOGA3	1	0.624165	0.246558
		SPPL3	1	0.790041	0.291183
		SREBF2	1	0.817902	0.450625
		SRR	1	0.747425	0.351111
		ST3GAL4	1	0.784584	0.48971
		ST3GAL6	1	0.80107	0.371131
		STAMBPL1	1	0.697372	0.31864
		SVEP1	1	0.358489	0.0824692
		TACC3	1	0.543367	0.183011
		TAGAP	1	0.411796	0.0818996
		TARBP2	1	0.707107	0.257028
		TBCEL	1	0.50698	0.160428
		TBXA2R	1	0.574349	0.179244
		TCTA	1	0.550953	0.208772
		TEF	1	0.521233	0.173139
		TEFM	1	0.641713	0.231647
		TFDP2	1	0.716978	0.435275
		THEMIS2	1	0.406126	0.0529216
		TIMELESS	1	0.466516	0.149685
		TLR3	1	0.712025	0.241484
		TM4SF5	1	0.737135	0.186856
		TMEM219	1	0.76313	0.486327
		TMEM69	1	0.773782	0.389582
		TMTC4	1	0.707107	0.423373
		TNFRSF19	1	0.817902	0.476319
		TRAF3IP3	1	0.578344	0.192109
		TRAPPC1	1	0.673617	0.371131
		TTK	1	0.578344	0.0967228
		TUBD1	1	0.479632	0.14161
		URM1	1	0.687771	0.316439
		VAMP8	1	0.835088	0.486327
		VANGL1	1	0.773782	0.438303
		WDHD1	1	0.858565	0.426317
		ZBTB3	1	0.554785	0.214641
		ZNF322	1	0.806642	0.408951
		ZNF786	1	0.790041	0.466516
		ZSCAN2	1	0.668964	0.241484
		AAAS	1	0.673617	0.45376
		ACBD5	1	0.702222	0.432269
		ACYP1	1	0.447513	0.20733
		ADRA2A	1	0.133972	0.0188407
		AGTR2	1	0.659754	0.426317
		AHSG	1	0.267943	0.0454366
		AK3	1	0.668964	0.493116
		ALB	1	0.325335	0.100134
		ALDH1A3	1	0.285191	0.0824692
		ANKRD45	1	0.628507	0.395021
		APITD1	1	0.716978	0.45376
		APOA1BP	1	0.479632	0.269807
		ARHGEF3	1	0.163799	0.034674
		ARRDC1	1	0.63728	0.45376
		ARSA	1	0.566442	0.266093
		ASH2L	1	0.646176	0.353553
		AWAT1	1	0.641713	0.450625
		B3GALNT1	1	0.239816	0.0406669
		BLM	1	0.469761	0.267943
		BPGM	1	0.150726	0.0217929
		BPHL	1	0.619854	0.429283
		BRCA2	1	0.558644	0.329877
		BRI3BP	1	0.664343	0.400535
		BSCL2	1	0.732043	0.48971
		BST1	1	0.198884	0.0540336
		BTD	1	0.447513	0.234881
		BUB1	1	0.389582	0.132127
		BUB1B	1	0.493116	0.184284
		C11H5ORF30	1	0.384219	0.15283
		C1H9ORF40	1	0.463294	0.251739
		C1QA	1	0.469761	0.251739
		C1QC	1	0.476319	0.248273
		C4H12ORF10	1	0.659754	0.473029
		CA1	1	0.133046	0.0115177
		CALR3	1	0.712025	0.493116
		CASP9	1	0.63728	0.408951
		CBR3	1	0.590496	0.287175
		CCDC153	1	0.432269	0.183011
		CCDC18	1	0.50698	0.25
		CCDC62	1	0.463294	0.230047
		CCDC8	1	0.420448	0.162668
		CCDC80	1	0.339151	0.111878
		CCL21	1	0.246558	0.072293
		CCNB2	1	0.360982	0.0896222
		CCS	1	0.496546	0.244855
		CD1B	1	0.650671	0.420448
		CDC6	1	0.514057	0.312083
		CDCA2	1	0.411796	0.133972
		CEP19	1	0.547147	0.314253
		CHP2	1	0.386891	0.145592
		CIAO1	1	0.514057	0.289172
		CIB1	1	0.358489	0.146604
		CISD1	1	0.456916	0.183011
		CITED1	1	0.381565	0.186856
		CLCN3	1	0.678302	0.456916
		CMAS	1	0.673617	0.441351
		COMMD10	1	0.574349	0.371131
		CPPED1	1	0.496546	0.29937
		CTSE	1	0.103665	0.0157337
		DAAM2	1	0.460094	0.25349
		DAK	1	0.376312	0.15283
		DAPP1	1	0.650671	0.381565
		DBI	1	0.406126	0.169576
		DCN	1	0.287175	0.0940779
		DERA	1	0.466516	0.193446
		DFNB31	1	0.539614	0.269807
		DISP1	1	0.366021	0.110338
		DLEU7	1	0.353553	0.133046
		DNASE1L1	1	0.566442	0.368567
		DTX4	1	0.528509	0.271684
		EIF2AK1	1	0.510506	0.260616
		EPHA4	1	0.157127	0.0395549
		ERICH1	1	0.619854	0.351111
		ERMARD	1	0.574349	0.269807
		EXOC6	1	0.664343	0.381565
		F8	1	0.650671	0.363493
		FAM78A	1	0.246558	0.0438889
		FLRT3	1	0.266093	0.0890031
		GAB3	1	0.528509	0.219151
		GALK2	1	0.371131	0.167241
		GAREM	1	0.63728	0.360982
		GGCX	1	0.517632	0.238159
		GPR160	1	0.220676	0.036906
		GPRC5D	1	0.420448	0.183011
		GTF3C2	1	0.607097	0.30566
		HBQ1_1	1	0.381565	0.168404
		HEBP1	1	0.5	0.297302
		HIATL1	1	0.590496	0.363493
		HLCS	1	0.371131	0.131215
		HPN	1	0.726986	0.479632
		HSD11B2	1	0.130308	0.0245183
		HSF5	1	0.628507	0.366021
		HTATSF1	1	0.716978	0.469761
		IDNK	1	0.528509	0.31864
		IFIT1B	1	0.188156	0.034674
		IFT57	1	0.503478	0.219151
		IGFBP5	1	0.236514	0.0571145
		IL12A	1	0.444421	0.198884
		IL1RL1	1	0.417544	0.211686
		IL7	1	0.327598	0.0836205
		ITGB2	1	0.602904	0.351111
		KIF22	1	0.339151	0.114229
		KIF2C	1	0.312083	0.124137
		KIF4A	1	0.358489	0.161544
		KIFC1	1	0.358489	0.139661
		KLHL13	1	0.514057	0.248273
		KNTC1	1	0.31864	0.112656
		L2HGDH	1	0.547147	0.325335
		LACTB2	1	0.673617	0.389582
		LAYN	1	0.607097	0.316439
		LMAN2	1	0.68302	0.476319
		LOC100008921	1	0.138696	0.020193
		LOC100009370	1	0.566442	0.316439
		LOC100339431	1	0.61132	0.389582
		LOC100341160	1	0.356013	0.123279
		LOC100342874	1	0.664343	0.400535
		LOC100342995	1	0.578344	0.356013
		LOC100349830	1	0.550953	0.30566
		LOC100350453	1	0.650671	0.376312
		LOC100352100	1	0.550953	0.320856
		LOC100353536	1	0.381565	0.160428
		LOC100353741	1	0.598739	0.392292
		LOC100353981	1	0.678302	0.435275
		LOC100355412	1	0.615572	0.346277
		LOC100355440	1	0.395021	0.170755
		LOC100356444	1	0.68302	0.479632
		LOC100356529	1	0.429283	0.220676
		LOC100356881	1	0.450625	0.153893
		LOC100357033	1	0.528509	0.29937
		LOC100357372	1	0.628507	0.444421
		LOC100357474	1	0.517632	0.301452
		LOC103346606	1	0.356013	0.138696
		LOC103347614	1	0.514057	0.303549
		LOC103348254	1	0.314253	0.0638133
		LOC103352134	1	0.429283	0.196146
		LRRC36	1	0.678302	0.447513
		LRRC57	1	0.535887	0.283221
		LTB	1	0.153893	0.0379436
		MAB21L1	1	0.632878	0.356013
		MAN1C1	1	0.450625	0.196146
		MAPK14	1	0.528509	0.262429
		MCM10	1	0.5	0.266093
		MDM1	1	0.692555	0.482968
		MELK	1	0.473029	0.208772
		MTBP	1	0.403321	0.153893
		MYOZ1	1	0.297302	0.0807721
		NEURL1	1	0.486327	0.239816
		NIPSNAP1	1	0.363493	0.124137
		NR1D1	1	0.230047	0.0409498
		NRM	1	0.281265	0.0656073
		NUDT12	1	0.543367	0.29937
		NUDT3	1	0.664343	0.473029
		NUP155	1	0.668964	0.450625
		OBSL1	1	0.550953	0.277392
		OSGEPL1	1	0.574349	0.297302
		PAFAH2	1	0.150726	0.0390103
		PBX1	1	0.687771	0.486327
		PCMTD2	1	0.707107	0.463294
		PCNXL4	1	0.50698	0.307786
		PGER8	1	0.297302	0.0607909
		PLAU	1	0.562529	0.323088
		PPIH	1	0.655197	0.463294
		PRSS12	1	0.678302	0.450625
		PTGER4	1	0.607097	0.417544
		PTPN4	1	0.444421	0.217638
		QDPR	1	0.460094	0.219151
		RARRES1	1	0.590496	0.301452
		RFTN1	1	0.532185	0.332171
		RNF170	1	0.473029	0.239816
		RPA2	1	0.619854	0.423373
		RRM1	1	0.574349	0.314253
		RSG1	1	0.482968	0.228458
		SCP2	1	0.514057	0.279322
		SERPINH1	1	0.535887	0.332171
		SH3KBP1	1	0.543367	0.348686
		SLC12A7	1	0.353553	0.160428
		SLC16A13	1	0.156041	0.0227183
		SLC25A15	1	0.496546	0.291183
		SLC25A39	1	0.417544	0.216134
		SLC27A4	1	0.550953	0.31864
		SLC46A2	1	0.307786	0.114229
		SLC5A6	1	0.539614	0.320856
		SLCO2B1	1	0.417544	0.171943
		SORL1	1	0.554785	0.244855
		SPA17	1	0.479632	0.211686
		SPAG5	1	0.438303	0.163799
		SRD5A1	1	0.400535	0.185565
		STIM2	1	0.444421	0.161544
		TARS2	1	0.521233	0.264255
		TATDN3	1	0.664343	0.400535
		TAX1BP3	1	0.562529	0.279322
		TBC1D24	1	0.246558	0.0612138
		TBC1D7	1	0.619854	0.34151
		TCF4	1	0.668964	0.466516
		TCIRG1	1	0.550953	0.303549
		THAP4	1	0.673617	0.447513
		THNSL1	1	0.301452	0.0674518
		TIMMDC1	1	0.554785	0.269807
		TK1	1	0.528509	0.30566
		TMEM216	1	0.712025	0.48971
		TMEM230	1	0.63728	0.426317
		TMEM27	1	0.628507	0.447513
		TNFRSF4	1	0.435275	0.196146
		TNFSF8	1	0.578344	0.384219
		TOP2A	1	0.34151	0.105112
		TRIM13	1	0.438303	0.20166
		TRIP13	1	0.469761	0.266093
		TTC5	1	0.673617	0.420448
		TUBA4A	1	0.578344	0.366021
		TULP2	1	0.607097	0.395021
		UBE2C	1	0.314253	0.111878
		UNC119	1	0.373712	0.15822
		VPS33A	1	0.535887	0.327598
		WDR34	1	0.482968	0.266093
		WDR72	1	0.223756	0.0540336
		WNT10B	1	0.348686	0.131215
		ZDHHC2	1	0.532185	0.255253
		ZFHX4	1	0.479632	0.22688
		ZNF74	1	0.426317	0.222211
		LOC100328910	1	0.0250334	0.014082

## Sheet: Cluster 2
		GeneSymbol	AS0	Fold (AS30/AS0)	Fold (AS60/AS0)
		AATF	1	0.469761	0.840896
		ABAT	1	0.289172	0.539614
		ABCF1	1	0.400535	0.840896
		ABRA	1	0.447513	1.61328
		ACER2	1	0.200267	0.456916
		ACO1	1	0.181747	0.496546
		ACO2	1	0.208772	0.353553
		ACSM5	1	0.243164	0.619854
		ACTR1B	1	0.0301855	1.30134
		ACVR1B	1	0.360982	4.25748
		ADAMTS9	1	0.257028	0.952638
		ADARB2	1	0.441351	0.673617
		ADIPOR1	1	0.598739	1.33793
		ADM	1	0.558644	2.39496
		ADORA2B	1	0.48971	1.68179
		ADORA3	1	0.574349	1.36604
		ADRB2	1	0.230047	0.582367
		AGFG2	1	0.343885	0.628507
		AHR	1	0.234881	0.353553
		ALDOA	1	0.435275	0.687771
		ALG1	1	0.486327	0.812252
		ALX4	1	0.586417	2.80889
		AMDHD1	1	0.34151	1.24833
		ANGPTL2	1	0.258816	0.547147
		ANGPTL4	1	0.20166	1.02101
		ANKRD13B	1	0.309927	0.659754
		ANXA8	1	0.378929	0.732043
		AOX1	1	0.389582	0.50698
		ARHGAP26	1	0.450625	0.598739
		ARHGEF26	1	0.539614	1.93187
		ARL4A	1	0.450625	0.566442
		ARNT	1	0.712025	1.58008
		ASIP	1	0.659754	1.48452
		ATG4D	1	0.479632	0.835088
		ATP13A3	1	0.566442	1.18099
		ATP1B3	1	0.707107	1.60214
		ATP5B	1	0.260616	0.373712
		ATP6V0D1	1	0.320856	0.517632
		B3GNT5	1	0.29937	1.90528
		BAIAP2L1	1	0.183011	0.312083
		BATF2	1	0.432269	0.840896
		BCR	1	0.702222	2.56685
		BDH1	1	0.161544	0.269807
		BIN3	1	0.574349	1.31951
		BIRC7	1	0.435275	0.650671
		BLVRB	1	0.41466	0.562529
		BMP3	1	0.493116	0.870551
		BMP7	1	0.0328615	0.0398651
		BNIP1	1	0.371131	0.726986
		BTG1	1	0.217638	0.366021
		BYSL	1	0.411796	1.72907
		C13H1ORF210	1	0.285191	0.493116
		C18H10ORF35	1	0.216134	0.687771
		C18H10ORF71	1	0.30566	0.558644
		C1H9ORF72	1	0.420448	0.697372
		C3	1	0.429283	0.594604
		C4H12ORF66	1	0.602904	1.27456
		C4H20ORF26	1	0.258816	0.812252
		C9	1	0.151774	0.285191
		CA5B	1	0.211686	0.360982
		CABLES1	1	0.632878	1.49485
		CAMK1G	1	0.417544	1.01396
		CAMKV	1	0.532185	1.12506
		CAMP	1	0.420448	1.79005
		CASP4	1	0.327598	2.01391
		CATSPER4	1	0.266093	0.426317
		CBY1	1	0.164938	0.444421
		CCDC176	1	0.615572	1.31039
		CCDC180	1	0.721965	2.09943
		CCDC73	1	0.314253	0.752623
		CCIN	1	0.632878	2.12874
		CCL19	1	0.198884	2.23457
		CCL7	1	0.307786	2.26577
		CCR10	1	0.11908	0.258816
		CCSER1	1	0.438303	1.60214
		CD1D	1	0.279322	0.823591
		CD70	1	0.420448	0.586417
		CDC42EP4	1	0.578344	2.69447
		CDCP1	1	0.456916	0.823591
		CDH19	1	0.768438	1.86607
		CDK17	1	0.641713	1.56917
		CDKN2D	1	0.251739	1.07923
		CDON	1	0.190782	0.376312
		CEL	1	0.469761	0.668964
		CENPB	1	0.479632	0.716978
		CER1	1	0.45376	0.926588
		CES3	1	0.368567	0.721965
		CHAC1	1	0.517632	1.28343
		CHD7	1	0.181747	0.423373
		CHRD	1	0.479632	1.07177
		CIAPIN1	1	0.486327	0.619854
		CLDN3	1	0.5	1.18921
		CLDN5	1	0.073812	0.503478
		CLEC1A	1	0.0890031	0.22688
		CLMP	1	0.463294	0.578344
		CLSTN2	1	0.411796	0.752623
		CMPK2	1	0.236514	0.712025
		CMTM8	1	0.241484	0.687771
		CNGA2	1	0.116629	0.314253
		CNGB3	1	0.615572	1.55833
		CNTN2	1	0.132127	0.353553
		COASY	1	0.22688	0.411796
		COMMD7	1	0.426317	0.712025
		COQ6	1	0.238159	0.353553
		CPEB4	1	0.348686	0.532185
		CPN2	1	0.389582	0.864537
		CREB3L1	1	0.373712	1.22264
		CRK	1	0.76313	1.54756
		CTHRC1	1	0.22688	0.400535
		CTPS2	1	0.795536	1.71713
		CX3CL1	1	0.68302	1.69349
		CXCL10	1	0.293209	8.81524
		CYP2G1	1	0.517632	1.16473
		DCAF7	1	0.378929	0.570382
		DCDC2	1	0.174343	0.426317
		DCT	1	0.664343	1.64718
		DHCR24	1	0.327598	0.607097
		DHTKD1	1	0.646176	1.43396
		DIRC2	1	0.447513	0.784584
		DLGAP1	1	0.476319	0.76313
		DLST	1	0.277392	0.406126
		DMRT1	1	0.659754	1.37554
		DNAH17	1	0.716978	1.56917
		DNAJA4	1	0.768438	2.01391
		DNAJC25	1	0.582367	1.18921
		DPPA5	1	0.406126	0.535887
		DRAM2	1	0.395021	0.959264
		DSCC1	1	0.562529	2.01391
		DTL	1	0.420448	0.712025
		DUSP6	1	0.417544	0.773782
		DZIP1L	1	0.547147	1.75321
		ECE1	1	0.168404	0.275476
		EDN2	1	0.486327	2.37841
		EDNRA	1	0.768438	1.58008
		EFNA1	1	0.230047	0.632878
		EGR4	1	0.269807	0.420448
		EHD3	1	0.411796	0.586417
		EIF2B2	1	0.447513	0.812252
		EIF4A1	1	0.742262	1.58008
		EIF5A	1	0.469761	0.602904
		ELAC2	1	0.41466	0.582367
		ELTD1	1	0.176777	0.346277
		EMX2	1	0.275476	0.532185
		ENO1	1	0.566442	1.56917
		ENO2	1	0.63728	1.75321
		ENO3	1	0.417544	0.895025
		ENPP3	1	0.189465	0.329877
		EPHB6	1	0.650671	1.31951
		ERP27	1	0.397768	0.757858
		ESM1	1	0.566442	2
		ETS1	1	0.486327	1.23114
		ETV5	1	0.406126	0.517632
		EXOSC2	1	0.429283	0.547147
		EZH2	1	0.466516	1.33793
		F3	1	0.142595	0.466516
		FABP12	1	0.493116	0.920188
		FADS2	1	0.20733	0.840896
		FAM124A	1	0.31864	0.812252
		FAM126B	1	0.655197	1.70527
		FAM167A	1	0.784584	1.85318
		FAM189A2	1	0.234881	2.62079
		FAM212A	1	0.336808	0.482968
		FAM25A	1	0.578344	1.61328
		FAM84B	1	0.400535	0.521233
		FBXL5	1	0.496546	0.82932
		FGD5	1	0.163799	0.291183
		FGF10	1	0.353553	0.517632
		FGL2	1	0.373712	1.31951
		FHL5	1	0.469761	0.939523
		FLI1	1	0.34151	0.747425
		FOS	1	0.386891	5.89708
		FOXK1	1	0.615572	1.25701
		FPR1	1	0.112656	0.238159
		FZD6	1	0.325335	0.482968
		GAN	1	0.373712	1.51572
		GAPDHS	1	0.476319	0.882703
		GCLM	1	0.392292	1.00696
		GCM2	1	0.456916	0.768438
		GDAP1L1	1	0.524858	1.30134
		GDF5	1	0.0947323	0.246558
		GFPT2	1	0.0669858	0.143587
		GGACT	1	0.189465	0.316439
		GGCT	1	0.482968	1.14076
		GLUD1	1	0.397768	0.716978
		GMPR2	1	0.486327	0.790041
		GPR176	1	0.381565	2.04202
		GPR45	1	0.659754	1.56917
		GPR56	1	0.15932	0.289172
		GPR64	1	0.164938	0.360982
		GPRC5A	1	0.301452	0.907519
		GPX1	1	0.423373	0.543367
		GRB10	1	0.378929	1.10191
		GRIA3	1	0.147624	0.271684
		GRIA4	1	0.346277	0.707107
		GRID2	1	0.171943	0.368567
		GRO-A	1	0.30566	13.3614
		GSN	1	0.238159	0.368567
		GTPBP6	1	0.450625	0.590496
		GYS1	1	0.543367	1.1487
		GZMH	1	0.558644	1.18921
		GZMK	1	0.570382	1.15669
		HACL1	1	0.432269	0.543367
		HARBI1	1	0.441351	0.986233
		HAS3	1	0.343885	0.846745
		HAUS6	1	0.441351	1.70527
		HBEGF	1	0.371131	1.95884
		HCRTR1	1	0.343885	0.460094
		HDX	1	0.790041	1.6358
		HERPUD1	1	0.275476	0.562529
		HILPDA	1	0.408951	6.10504
		HK2	1	0.121582	1.18921
		HK3	1	0.360982	0.547147
		HMBOX1	1	0.432269	0.594604
		HMGCR	1	0.466516	0.858565
		HMOX2	1	0.503478	1.08673
		HP	1	0.102238	0.858565
		HS6ST1	1	0.348686	0.517632
		HSD17B11	1	0.482968	1
		HSD17B12	1	0.138696	0.279322
		HSD17B13	1	0.320856	0.687771
		HSF2BP	1	0.204476	0.463294
		HSPB9	1	0.590496	1.50525
		HSPD1	1	0.332171	0.473029
		HTT	1	0.351111	1.12506
		IBSP	1	0.426317	2.56685
		ICAM-1	1	0.397768	1.43396
		IDH2	1	0.447513	0.972655
		IDH3A	1	0.438303	0.933033
		IDH3G	1	0.368567	0.562529
		IDO1	1	0.0595399	0.149685
		IFRD2	1	0.339151	0.50698
		IGF1	1	0.123279	0.22688
		IGKC2	1	0.15932	0.327598
		IKBKG	1	0.50698	1.18099
		IKZF1	1	0.524858	1.84038
		IL10	1	0.266093	2.75108
		IL10RB	1	0.469761	0.768438
		IL12B	1	0.482968	1.15669
		IL17RB	1	0.615572	1.31039
		IL18BP	1	0.420448	0.840896
		IL1B	1	0.223756	1.17283
		IL1R1	1	0.346277	1.68179
		IL22RA1	1	0.429283	0.650671
		IL23A	1	0.435275	0.926588
		IL5	1	0.334482	0.45376
		IL6ST	1	0.574349	2.75108
		IMP4	1	0.400535	0.965936
		IMPA2	1	0.184284	0.742262
		IP6K3	1	0.262429	0.503478
		IPO4	1	0.486327	0.835088
		IPPK	1	0.429283	0.806642
		IRAK4	1	0.721965	1.68179
		IRF1	1	0.456916	1.60214
		ISG20L2	1	0.678302	1.65864
		ITGA4	1	0.450625	0.870551
		ITIH4	1	0.535887	4.89056
		ITPR2	1	0.343885	0.757858
		JADE1	1	0.615572	1.47427
		JAGN1	1	0.339151	0.692555
		KCNA3	1	0.400535	0.90125
		KCNC3	1	0.34151	1.24833
		KCNJ10	1	0.473029	0.61132
		KCNJ4	1	0.285191	1.27456
		KCNK4	1	0.420448	0.68302
		KDSR	1	0.411796	0.697372
		KIAA0100	1	0.264255	0.566442
		KIAA1377	1	0.628507	3.50642
		KLF15	1	0.773782	1.77769
		KRT32	1	0.358489	0.712025
		L3MBTL4	1	0.784584	1.81504
		LAMP5	1	0.400535	1.08673
		LCN2	1	0.323088	1.51572
		LDHA	1	0.368567	1.70527
		LEF1	1	0.594604	1.6245
		LEP	1	0.473029	0.594604
		LGI4	1	0.360982	0.486327
		LGSN	1	0.539614	1.14076
		LHX4	1	0.742262	1.52626
		LHX6	1	0.314253	0.76313
		LIF	1	0.566442	3.63008
		LIFR	1	0.351111	0.473029
		LIPH	1	0.517632	1.28343
		LIPM	1	0.473029	0.632878
		LNPEP	1	0.479632	0.721965
		LOC100008716	1	0.220676	0.554785
		LOC100008742	1	0.277392	0.939523
		LOC100008796	1	0.0193704	0.823591
		LOC100008810	1	0.812252	1.69349
		LOC100008880	1	0.00287943	0.532185
		LOC100328937	1	0.823591	1.68179
		LOC100338201	1	0.594604	1.31039
		LOC100338355	1	0.386891	0.687771
		LOC100338408	1	0.482968	1.93187
		LOC100338430	1	0.381565	2.08493
		LOC100340294	1	0.646176	1.37554
		LOC100340858	1	0.132127	0.882703
		LOC100340967	1	0.327598	0.646176
		LOC100341153	1	0.411796	0.707107
		LOC100342267	1	0.432269	0.61132
		LOC100342857	1	0.186856	0.332171
		LOC100343277	1	0.271684	0.757858
		LOC100343291	1	0.712025	1.90528
		LOC100343913	1	0.397768	1.67018
		LOC100344686	1	0.184284	0.389582
		LOC100345328	1	0.316439	0.450625
		LOC100345385	1	0.594604	2.09943
		LOC100345894	1	0.707107	1.42405
		LOC100345910	1	0.562529	1.33793
		LOC100346348	1	0.678302	1.93187
		LOC100346467	1	0.178006	0.303549
		LOC100346726	1	0.0847878	0.400535
		LOC100346910	1	0.408951	0.90125
		LOC100347571	1	0.183011	0.535887
		LOC100348861	1	0.615572	1.27456
		LOC100348967	1	0.632878	1.38511
		LOC100349005	1	0.707107	1.82766
		LOC100349006	1	0.426317	1
		LOC100349629	1	0.476319	2.65737
		LOC100349810	1	0.594604	1.98618
		LOC100350060	1	0.45376	1.29235
		LOC100350135	1	0.389582	0.524858
		LOC100350165	1	0.222211	0.346277
		LOC100353317	1	0.329877	0.61132
		LOC100354329	1	0.293209	0.503478
		LOC100354734	1	0.15283	0.532185
		LOC100355015	1	0.466516	0.742262
		LOC100355436	1	0.189465	0.602904
		LOC100356044	1	0.460094	0.602904
		LOC100356058	1	0.473029	1.56917
		LOC100356242	1	0.5	1.40444
		LOC100356376	1	0.602904	1.20581
		LOC100356715	1	0.510506	1.16473
		LOC100356833	1	0.496546	0.697372
		LOC100357377	1	0.244855	0.521233
		LOC100358731	1	0.291183	0.417544
		LOC100358849	1	0.145592	0.697372
		LOC103345397	1	0.742262	1.93187
		LOC103347493	1	0.469761	1.23971
		LOC103349135	1	0.476319	1.07177
		LOXL4	1	0.48971	0.876606
		LPCAT3	1	0.5	0.870551
		LPIN3	1	0.590496	2.2974
		LPL	1	0.00123609	0.00103942
		LRP4	1	0.632878	1.91853
		LRRC28	1	0.423373	0.594604
		LRRC40	1	0.619854	1.38511
		LRRC52	1	0.411796	0.673617
		LRRC6	1	0.251739	0.582367
		LSMEM1	1	0.320856	0.823591
		LYVE1	1	0.325335	0.817902
		MAGI1	1	0.586417	1.67018
		MAML3	1	0.641713	2.23457
		MAOB	1	0.447513	0.712025
		MAP2K1	1	0.366021	0.650671
		MAP3K6	1	0.692555	1.89212
		MARS	1	0.373712	0.726986
		MCFD2	1	0.466516	1.38511
		MCM7	1	0.273573	0.539614
		MCMDC2	1	0.239816	0.517632
		MCTP2	1	0.615572	1.31951
		MEDAG	1	0.0708052	0.243164
		METTL22	1	0.692555	1.6358
		METTL24	1	0.48971	1.31951
		MID1IP1	1	0.376312	0.503478
		MID2	1	0.450625	0.840896
		MKL2	1	0.578344	1.15669
		MMD	1	0.104386	0.420448
		MMRN2	1	0.737135	1.53688
		MORN3	1	0.45376	0.562529
		MPDU1	1	0.406126	0.524858
		MPZL3	1	0.31864	0.607097
		MRPL17	1	0.208772	0.668964
		MRPS18B	1	0.332171	0.895025
		MRRF	1	0.473029	0.773782
		MS4A1	1	0.208772	0.668964
		MSI2	1	0.48971	2.34567
		MYBPC3	1	0.285191	0.429283
		MYD88	1	0.582367	1.17283
		MYH13	1	0.48971	0.965936
		MYH3	1	0.702222	1.42405
		MYL1	1	0.63728	1.39474
		MYL3	1	0.757858	1.86607
		NAA40	1	0.476319	0.773782
		NDRG1	1	0.795536	1.8025
		NECAP1	1	0.486327	0.607097
		NEIL2	1	0.204476	0.378929
		NEK6	1	0.373712	1.09429
		NFS1	1	0.289172	0.514057
		NHSL2	1	0.289172	0.420448
		NLN	1	0.41466	0.858565
		NMUR2	1	0.248273	1.6245
		NNAT	1	0.381565	0.521233
		NOC2L	1	0.554785	1.3566
		NOD1	1	0.476319	0.732043
		NOD2	1	0.450625	1.00696
		NOP2	1	0.558644	1.20581
		NPC1L1	1	0.732043	1.53688
		NPFFR2	1	0.476319	0.697372
		NR5A2	1	0.239816	0.386891
		NR6A1	1	0.784584	1.89212
		NRAP	1	0.175556	0.712025
		NRIP1	1	0.641713	1.67018
		NRP2	1	0.607097	1.85318
		NT5C2	1	0.441351	0.858565
		NTRK2	1	0.550953	1.26576
		NUF2	1	0.486327	0.607097
		NUPR1L	1	0.149685	0.273573
		NUSAP1	1	0.200267	0.316439
		NUTM1	1	0.429283	0.721965
		NXT2	1	0.61132	1.24833
		ODF3	1	0.147624	0.320856
		OLFR651_1	1	0.171943	0.353553
		ORC5	1	0.469761	0.768438
		ORYCUNV1R1573	1	0.641713	1.29235
		OSBPL10	1	0.63728	1.59107
		OTUD6A	1	0.447513	0.632878
		P2RX5	1	0.747425	2.05623
		PADI3	1	0.747425	2.07053
		PANX1	1	0.450625	2.9897
		PAQR9	1	0.469761	1.18099
		PARVB	1	0.469761	0.632878
		PDCD1	1	0.790041	1.65864
		PDE4B	1	0.406126	4.22807
		PDK4	1	0.316439	5.73582
		PDPR	1	0.395021	0.742262
		PES1	1	0.473029	0.712025
		PEX13	1	0.747425	1.69349
		PEX3	1	0.466516	1.15669
		PEX5	1	0.373712	0.539614
		PFKFB3	1	0.0270168	0.173139
		PFKM	1	0.473029	0.61132
		PGAM1	1	0.426317	0.768438
		PGK2	1	0.752623	1.71713
		PGLYRP2	1	0.435275	0.806642
		PGM1	1	0.363493	0.895025
		PGR	1	0.179244	0.432269
		PHB2	1	0.271684	0.389582
		PHEX	1	0.170755	0.312083
		PIM2	1	0.574349	1.65864
		PISD	1	0.420448	1.27456
		PITPNC1	1	0.450625	0.817902
		PKHD1L1	1	0.397768	0.550953
		PLAT	1	0.615572	1.55833
		PLB1	1	0.539614	1.15669
		PLEKHG1	1	0.320856	1.02101
		PLEKHG3	1	0.486327	0.607097
		PLEKHH1	1	0.692555	1.67018
		PLIN2	1	0.41466	1.18099
		PLK2	1	0.185565	0.486327
		PLXDC1	1	0.236514	0.466516
		PML	1	0.279322	0.628507
		PNP	1	0.15932	0.368567
		POLR3E	1	0.712025	2.02792
		PPARA	1	0.373712	1.76541
		PPARD	1	0.659754	1.89212
		PPIF	1	0.168404	0.325335
		PPP1R13B	1	0.441351	0.586417
		PPP1R32	1	0.586417	1.91853
		PPP2R1B	1	0.267943	0.411796
		PRLR	1	0.486327	0.846745
		PROCR	1	0.246558	0.716978
		PROSER2	1	0.301452	2.08493
		PROX1	1	0.283221	0.615572
		PRR16	1	0.175556	0.466516
		PSMA4	1	0.469761	0.61132
		PSMB9	1	0.441351	0.632878
		PSMD4	1	0.45376	1.01396
		PSMF1	1	0.25	0.389582
		PTCH1	1	0.198884	0.435275
		PTGER3	1	0.289172	0.435275
		PTGFRN	1	0.469761	0.870551
		PTGS1	1	0.31864	0.493116
		PTK2B	1	0.389582	1.07923
		PTP4A3	1	0.210224	1.10191
		PTPRM	1	0.312083	0.554785
		PTX3	1	0.343885	9.06307
		PUS7	1	0.411796	0.624165
		PXK	1	0.395021	0.895025
		RAB13	1	0.406126	0.757858
		RACGAP1	1	0.535887	1.3566
		RAD54L	1	0.348686	0.632878
		RANBP10	1	0.48971	0.598739
		RARRES2	1	0.334482	0.532185
		RASD1	1	0.0366511	0.381565
		RASGEF1B	1	0.168404	0.503478
		RASGEF1C	1	0.392292	0.747425
		RBP4	1	0.157127	0.273573
		RCAN3	1	0.368567	1.00696
		RCBTB1	1	0.384219	0.496546
		RCVRN	1	0.628507	1.71713
		REL	1	0.521233	3.38698
		RGS3	1	0.339151	0.882703
		RHAG	1	0.381565	1.02811
		RHOU	1	0.590496	1.38511
		RILPL1	1	0.493116	0.757858
		RIN3	1	0.646176	1.91853
		RMND5A	1	0.45376	0.594604
		RNF19B	1	0.366021	1.19748
		RNMTL1	1	0.578344	1.61328
		RPUSD4	1	0.473029	0.692555
		RRP12	1	0.378929	0.986233
		RRP9	1	0.650671	1.49485
		RUNDC1	1	0.795536	1.77769
		S100A9	1	0.11744	0.289172
		S1PR3	1	0.267943	0.959264
		SDHC	1	0.378929	0.524858
		SEL1L3	1	0.550953	1.7411
		SEMA3A	1	0.213159	0.514057
		SEMA3C	1	0.307786	0.97942
		SERPINA6	1	0.628507	1.25701
		SFMBT1	1	0.532185	1.24833
		SFRP4	1	0.316439	1.64718
		SFXN1	1	0.45376	0.582367
		SGCG	1	0.214641	0.582367
		SGK1	1	0.351111	0.619854
		SH3BP2	1	0.590496	2.2974
		SHMT2	1	0.22688	0.673617
		SIGMAR1	1	0.420448	0.615572
		SIX6	1	0.578344	1.60214
		SLC16A1	1	0.0733022	0.535887
		SLC19A3	1	0.260616	0.420448
		SLC22A4	1	0.466516	7.88986
		SLC24A3	1	0.0871715	0.241484
		SLC25A13	1	0.466516	0.768438
		SLC25A26	1	0.336808	0.528509
		SLC26A7	1	0.400535	0.768438
		SLC26A8	1	0.63728	1.32869
		SLC2A3	1	0.447513	7.11074
		SLC2A4	1	0.260616	0.926588
		SLC31A1	1	0.136787	0.812252
		SLC35A4	1	0.435275	0.558644
		SLC39A10	1	0.400535	0.550953
		SLC39A2	1	0.503478	1.09429
		SLC3A2	1	0.403321	1.16473
		SLC4A2	1	0.466516	0.97942
		SLC4A9	1	0.594604	3.09513
		SLC6A11	1	0.466516	1.51572
		SLC7A9	1	0.204476	0.329877
		SMC1B	1	0.395021	0.50698
		SMPD1	1	0.243164	0.406126
		SNCG	1	0.214641	0.336808
		SOAT1	1	0.602904	1.51572
		SOD-2	1	0.20733	0.524858
		SPATA4	1	0.707107	2.42839
		SPNS3	1	0.447513	0.76313
		SREBP-1	1	0.447513	0.737135
		SRGN	1	0.295248	0.895025
		ST1A8	1	0.737135	1.61328
		STARD13	1	0.479632	0.882703
		STC1	1	0.586417	2.07053
		STOML3	1	0.473029	1.05702
		STYK1	1	0.5	1.65864
		SUCLA2	1	0.473029	0.726986
		SYCP1	1	0.450625	1.25701
		SYS1	1	0.795536	1.81504
		SYT13	1	0.10083	0.275476
		SYT9	1	0.726986	1.47427
		SYTL1	1	0.238159	0.360982
		TACR2	1	0.403321	0.574349
		TADA1	1	0.641713	2.01391
		TAP1	1	0.460094	1.31951
		TBC1D20	1	0.400535	1.07177
		TC2N	1	0.493116	1.93187
		TCF21	1	0.0555527	0.189465
		TDRD5	1	0.624165	1.40444
		TDRKH	1	0.747425	2.05623
		TEX10	1	0.773782	1.97247
		TEX2	1	0.356013	0.80107
		TFIP11	1	0.48971	0.721965
		TGFBI	1	0.295248	0.535887
		TGIF2	1	0.655197	1.6358
		TGM1	1	0.598739	1.29235
		TGM3	1	0.213159	1.31039
		THBD	1	0.225313	0.351111
		TIMM50	1	0.400535	0.607097
		TMCC3	1	0.316439	0.558644
		TMED5	1	0.493116	0.835088
		TMEM139	1	0.200267	0.554785
		TMEM173	1	0.444421	0.659754
		TMEM176B	1	0.417544	1.36604
		TMEM185B	1	0.386891	0.517632
		TMEM62	1	0.233258	0.535887
		TMEM87B	1	0.479632	1.21419
		TNFAIP6	1	0.0660636	0.959264
		TNMD	1	0.392292	0.650671
		TNP1	1	0.550953	2.25012
		TP53TG5	1	0.650671	1.38511
		TRAPPC3	1	0.450625	0.68302
		TRH	1	0.397768	0.913831
		TRIM5	1	0.466516	0.702222
		TRIM66	1	0.615572	2.23457
		TRMT10A	1	0.493116	1.22264
		TSPAN7	1	0.320856	0.473029
		TSTD2	1	0.768438	1.59107
		TTPA	1	0.323088	0.48971
		TULP4	1	0.426317	0.726986
		TUT1	1	0.429283	0.737135
		TXNIP	1	0.429283	1.38511
		UAP1	1	0.420448	0.721965
		UBASH3A	1	0.384219	0.615572
		UBE2G2	1	0.438303	1.15669
		UBE2U	1	0.582367	1.59107
		UBTD1	1	0.438303	0.82932
		UCN3	1	0.697372	2.09943
		UGP2	1	0.408951	0.586417
		UNC5D	1	0.368567	0.566442
		USP31	1	0.473029	0.817902
		USP43	1	0.61132	1.58008
		VAX2	1	0.63728	1.79005
		VCAM1	1	0.615572	1.48452
		VDAC1	1	0.29937	0.463294
		VGLL2	1	0.190782	0.400535
		VWCE	1	0.217638	0.721965
		WARS	1	0.417544	0.659754
		WDR33	1	0.378929	0.726986
		WDR76	1	0.438303	0.678302
		WDR88	1	0.460094	0.806642
		WDR91	1	0.45376	0.619854
		WNT2B	1	0.325335	0.463294
		WNT5A	1	0.447513	0.590496
		XKR9	1	0.420448	1.93187
		YPEL4	1	0.400535	0.558644
		ZFYVE1	1	0.360982	0.790041
		ZMAT4	1	0.332171	0.450625
		ZNF317	1	0.574349	1.16473
		ZNF408	1	0.602904	1.82766
		ZNF70	1	0.371131	0.692555
		ZP4	1	0.193446	0.31864
		ZSCAN25	1	0.752623	1.6245

## Sheet: Cluster 3
		GeneSymbol	AS0	Fold (AS30/AS0)	Fold (AS60/AS0)
		2016-03-07	1	1.54756	2.67586
		A4GALT	1	1.69349	2.11404
		AARD	1	1.77769	2.49666
		ABCC9	1	2.67586	3.78423
		ABHD1	1	2.69447	2.88786
		ABL2	1	2.67586	5.85634
		ABRACL	1	6.40856	5.73582
		ACBD3	1	1.8025	2.42839
		ACSBG2	1	6.23332	5.02805
		ACTA2	1	11.8762	16
		ACTBL2	1	8.11168	9.91766
		ACTG2	1	12.9063	23.7524
		ACTN1	1	7.01285	12.9063
		ACTN2	1	4.05584	6.63456
		ACTR3	1	2.21914	2.23457
		ACTR3B	1	2.63902	4.69134
		ACVR1	1	2.32947	3.18215
		ADAD1	1	113.772	377.413
		ADAM19	1	2.80889	4.65893
		ADAM22	1	3.70635	4
		ADAMTSL4	1	5.73582	4.16986
		ADARB1	1	2.92817	6.77396
		ADCY10	1	2.07053	2.54912
		ADCY2	1	1.72907	3.34035
		ADCY5	1	1.67018	3.31728
		ADCY8	1	2.49666	3.11666
		ADCY9	1	15.7797	17.0299
		ADRA1A	1	2.49666	2.42839
		ADRA1D	1	2.07053	2.82843
		AFAP1L2	1	1.75321	2
		AFF2	1	3.31728	3.45815
		AFF4	1	2.09943	3.73213
		AGL	1	3.36359	3.05252
		AHI1	1	3.41054	7.56846
		AHSA2	1	2.44528	1.94531
		AK4	1	3.83706	11.3137
		AKAP6	1	7.11074	11.2356
		AKT3	1	3.75809	3.63008
		ANGPT2	1	4.85678	3.43426
		ANGPTL1	1	3.65533	4.89056
		ANGPTL7	1	2.49666	2.17347
		ANK3	1	1.72907	2.62079
		ANKH	1	2.94854	7.94474
		ANKRD10	1	1.45397	2.12874
		ANKRD37	1	4.75683	5.65685
		ANKRD42	1	2.88786	3.31728
		ANKRD44	1	3.94493	3.29436
		ANO2	1	1.70527	2.07053
		ANP32E	1	2.26577	2.75108
		ANTXR2	1	3.16017	4.34694
		ANXA4	1	2.11404	2.75108
		AP4E1	1	1.60214	2.90795
		AP4S1	1	1.8025	2.09943
		APBB1	1	1.50525	2.11404
		AQP1	1	2.42839	2.09943
		ARCN1	1	1.86607	2.39496
		ARID4A	1	2.12874	2.77022
		ARID4B	1	2.77022	5.09824
		ARL6IP5	1	1.54756	2.11404
		ARSJ	1	6.54322	5.46416
		ASCC3	1	2.18859	2.20381
		ASIC1	1	3.01049	2.32947
		ASRGL1	1	2.07053	3.38698
		ASXL3	1	4	7.4127
		ATAD2	1	2	2.60268
		ATF1	1	1.81504	2.75108
		ATF3	1	17.7531	8.87656
		ATG16L2	1	7.83536	5.31474
		ATP1B2	1	12.7286	19.0273
		ATP2A2	1	3.68075	7.83536
		ATP2A3	1	3.31728	7.51618
		ATP4A	1	2.36199	2.86791
		ATP6V0D2	1	2.20381	5.81589
		ATP8B1	1	2.9897	8.1681
		ATPIF1	1	2.14355	3.07375
		ATRX	1	1.89212	2.28153
		ATXN1	1	3.01049	5.50217
		AZIN1	1	3.16017	3.75809
		B3GNT2	1	3.63008	4.46915
		B4GALNT2	1	1.98618	2.18859
		B4GALT4	1	2.21914	3.94493
		BAG2	1	10.6295	13.737
		BAG3	1	3.65533	8.75435
		BAZ1A	1	1.75321	3.36359
		BCAS4	1	3.94493	2.88786
		BCHE	1	436.549	504.951
		BCL2L1	1	1.82766	4.05584
		BCL6	1	2.01391	4.19887
		BCL7B	1	1.76541	3.89062
		BEND3	1	1.71713	3.53081
		BEND5	1	2.47942	2.14355
		BEND6	1	4.95883	4.69134
		BICC1	1	2.46229	1.93187
		BICD1	1	4.34694	27.2843
		BLOC1S6	1	2.18859	1.79005
		BMF	1	8.75435	6.02099
		BMPR1A	1	1.47427	2.02792
		BRIP1	1	2.20381	2.02792
		BRMS1L	1	3.36359	2.65737
		BVES	1	12.295	14.5203
		C18H10ORF120	1	4.92458	4.11246
		C1H11ORF53	1	2.2974	2.41162
		C1H11ORF57	1	2.21914	2.28153
		C1QTNF7	1	9.78112	12.5533
		C2H2ORF81	1	1.49485	2.51403
		C3AR1	1	2.21914	2.2974
		CACH2C	1	4.14106	7.72749
		CACNA1C	1	4.53154	5.9794
		CACNA2D1	1	2.07053	2.63902
		CACNB1	1	1.94531	3.38698
		CACNB2	1	8.45614	29.6508
		CADM1	1	4.75683	3.31728
		CALD1	1	5.50217	6.58873
		CALM2	1	2.86791	2.41162
		CALU	1	1.75321	2.63902
		CAMK1D	1	2.71321	3.65533
		CAMK2D	1	2.18859	1.87905
		CAP2	1	7.78124	19.5622
		CAPZA2	1	1.97247	2.51403
		CASQ2	1	17.7531	44.9422
		CCDC3	1	3.86375	5.35171
		CCDC6	1	4.50023	6.1475
		CCDC82	1	2.26577	1.85318
		CCKBR	1	1.60214	2.09943
		CCNB1IP1	1	6.27667	4.43828
		CCNB3	1	2.49666	2.01391
		CCR2	1	1.97247	2.62079
		CCR8	1	3.09513	6.49802
		CCT3	1	1.52626	2.15846
		CCT6B	1	1.69349	2.31338
		CD274	1	2.78949	3.83706
		CD74	1	2.11404	1.77769
		CD80	1	2.26577	3.22657
		CD86	1	4.59479	7.4127
		CDC42BPB	1	1.70527	2.53151
		CDH11	1	3.18215	2.36199
		CDH17	1	1.54756	2.31338
		CDH8	1	3.03143	3.41054
		CDK14	1	3.53081	5.20537
		CDKL2	1	5.81589	5.57897
		CDKN1A	1	4.05584	3.94493
		CDS2	1	2.56685	7.72749
		CEBPZ	1	1.67018	2.51403
		CEP120	1	1.86607	2.31338
		CEP192	1	2.94854	3.07375
		CEP41	1	1.56917	2.34567
		CEP57	1	1.45397	2.31338
		CES5A	1	2.28153	2.51403
		CHD2	1	1.42405	2.01391
		CHIC1	1	2.2974	1.97247
		CHMP2B	1	2.47942	3.05252
		CHORDC1	1	2.96905	2.39496
		CHSY3	1	11.3924	17.8766
		CIT	1	2.77022	4.78991
		CLCA2	1	2.96905	4.59479
		CLDN18	1	6.82108	7.83536
		CLIC4	1	2.9897	4.82323
		CLK4	1	1.67018	2.05623
		CLSTN3	1	4.11246	4.72397
		CNKSR3	1	5.27803	5.31474
		CNN3	1	1.86607	2.67586
		CNTLN	1	2.39496	2.31338
		COBLL1	1	4	4.50023
		COCH	1	7.21	4.28709
		COG6	1	3.18215	5.09824
		COL12A1	1	3.75809	5.1337
		COL21A1	1	12.2101	9.06307
		COL4A5	1	59.3016	31.3414
		COL8A1	1	17.7531	16.1113
		COLEC11	1	1.97247	2.46229
		CORO1C	1	2.11404	3.34035
		CPA5	1	4.50023	5.85634
		CPED1	1	4.72397	8.57419
		CPNE2	1	2.46229	3.31728
		CPNE6	1	4.82323	4.50023
		CPXM2	1	2.67586	5.89708
		CREBRF	1	1.60214	2.8481
		CRIM1	1	2.86791	4.59479
		CSN2	1	1.67018	2.14355
		CSNK1A1	1	1.87905	2.90795
		CSRP1	1	7.67411	12.2101
		CSRP2	1	48.8403	75.5835
		CTGF	1	15.0324	53.4456
		CTSC	1	3.63008	2.94854
		CTSK	1	3.41054	3.97237
		CTTNBP2	1	2.73208	4.56305
		CUL3	1	1.81504	2.47942
		CWC22	1	2.17347	3.45815
		CYP3A6	1	2.58471	2.69447
		CYR61	1	7.83536	6.9644
		DAPL1	1	3.36359	3.50642
		DCAF6	1	1.38511	2.11404
		DCLK1	1	2.2974	2.46229
		DDAH1	1	2.71321	2.65737
		DDIT3	1	2.21914	3.86375
		DDX5	1	1.85318	2.69447
		DEK	1	2.2974	3.75809
		DGKI	1	26.5382	78.7932
		DIAPH1	1	2.88786	4.72397
		DIAPH2	1	5.16941	7.26015
		DIAPH3	1	4.78991	5.50217
		DIP2C	1	2.23457	3.41054
		DIXDC1	1	7.31065	4.85678
		DKC1	1	1.95884	2.14355
		DKK3	1	12.996	10.7034
		DMBX1	1	1.77769	2.54912
		DMTF1	1	1.51572	2.21914
		DNAH7	1	2.75108	6.77396
		DNAJB9	1	1.58008	2.86791
		DNAJC18	1	2.34567	2.09943
		DNAJC21	1	2.09943	5.46416
		DNAL4	1	2.60268	4.16986
		DNTTIP2	1	2.37841	2.82843
		DOCK7	1	3.68075	3.31728
		DPYD	1	1.86607	2.09943
		DTNA	1	24.2515	45.5696
		DUOX2	1	1.47427	2.32947
		DUS4L	1	2.05623	1.86607
		DUSP26	1	4.37717	3.38698
		DUSP27	1	57.68	35.5062
		EARS2	1	1.50525	2.21914
		EDA	1	2.9897	2.8481
		EDIL3	1	27.6652	58.4852
		EFCAB2	1	2.01391	2.71321
		EFEMP1	1	3.29436	4.05584
		EFHD1	1	6.32033	9.18959
		EFR3A	1	2.67586	3.5801
		EGR2	1	1.40444	2.14355
		EHBP1L1	1	2.88786	3.45815
		EIF1B	1	2.01391	1.79005
		ELL2	1	5.1337	7.51618
		ELOVL4	1	15.1369	11.2356
		EML1	1	1.8025	2.69447
		ENDOD1	1	4	5.85634
		ENKUR	1	2	3.38698
		ENOSF1	1	1.76541	2.08493
		ENY2	1	1.72907	3.18215
		EPAS1	1	2.71321	9.44794
		EPC2	1	1.93187	2.25012
		EPHA3	1	5.54044	3.55537
		EPHA7	1	3.03143	2.46229
		EPHB3	1	2.21914	2.37841
		ERBB2IP	1	2.34567	3.05252
		ERBB4	1	2.60268	9.12611
		ERF	1	1.6245	2.26577
		ETNPPL	1	2.21914	3.07375
		ETV1	1	2.11404	4.78991
		ETV3L	1	4.08405	6.49802
		ETV6	1	1.70527	2.63902
		EVA1C	1	2.41162	3.81055
		F10	1	3.41054	3.13834
		F2	1	1.69349	3.07375
		F2RL1	1	2.26577	1.95884
		F9	1	2.77022	2.31338
		FAM129A	1	10.4831	12.7286
		FAM131B	1	8.81524	11.4716
		FAM150B	1	23.4254	222.861
		FAM181B	1	4.95883	3.38698
		FAM184A	1	5.57897	24.59
		FAM188A	1	2.02792	2.15846
		FAM198B	1	2.39496	2.25012
		FAM19A4	1	4.99332	9.44794
		FAM208B	1	1.95884	2.78949
		FAM3C	1	2.96905	2.67586
		FAM91A1	1	1.95884	3.03143
		FAS	1	2.31338	5.38893
		FBLN5	1	3.13834	3.07375
		FBXO32	1	7.88986	14.6213
		FBXO33	1	2.12874	2.53151
		FEZ1	1	2.9897	3.50642
		FGD2	1	1.77769	3.5801
		FGF13	1	10.1965	7.1602
		FGF21	1	2.28153	2.96905
		FGFR2	1	4.37717	7.06162
		FHL2	1	1.8025	3.89062
		FHOD3	1	77.7085	100.427
		FIBIN	1	59.7141	26.5382
		FKBP5	1	3.65533	16.2234
		FLNA	1	16	14.0257
		FMOD	1	14.8254	30.6965
		FMR1	1	2.07053	2.28153
		FN1	1	10.1261	5.89708
		FNDC3B	1	2.20381	4.25748
		FOXP1	1	3.94493	6.9644
		FRY	1	2.21914	2.65737
		FRZB	1	5.46416	7.4127
		GABRA3	1	7.67411	6.77396
		GALNT2	1	3.43426	2.73208
		GALNT3	1	1.93187	3.07375
		GATAD2B	1	1.70527	3.01049
		GCH1	1	3.24901	3.65533
		GEM	1	9.57983	6.36429
		GGT7	1	2.90795	3.55537
		GK	1	4.11246	3.45815
		GLIPR1	1	9.64646	17.6305
		GLIS1	1	2.14355	2.34567
		GLIS2	1	2.73208	2.41162
		GLP1R	1	6.49802	8.57419
		GLS	1	4.31691	6.1475
		GLS2	1	1.7411	2.82843
		GLT8D2	1	2.28153	2.12874
		GMDS	1	2.11404	2.02792
		GNB4	1	2.14355	2.54912
		GNPDA2	1	2.08493	1.93187
		GOLGA3	1	1.40444	2.02792
		GOLIM4	1	4.95883	3.53081
		GOLPH3	1	1.69349	2.15846
		GOLT1B	1	2.09943	2.8481
		GPC6	1	4.46915	6.06287
		GPM6B	1	4.75683	6.1475
		GPR37	1	8.81524	12.6407
		GPR75	1	2.58471	2.31338
		GPR87	1	1.67018	2.37841
		GPRASP1	1	2.01391	2.92817
		GPRIN2	1	9.38268	9.00047
		GPSM2	1	5.50217	22.6274
		GRB14	1	77.1717	44.0173
		GREM1	1	2.37841	4.89056
		GRK4	1	2.04202	2
		GRK7	1	2.51403	4.14106
		GRWD1	1	1.6358	2.01391
		GSTA4	1	3.55537	3.86375
		GTF2E2	1	2.60268	2.82843
		GTPBP4	1	1.86607	3.75809
		GUCY1B3	1	5.16941	4.08405
		HCFC2	1	1.53688	2.34567
		HDGFL1	1	2.15846	1.93187
		HDHD2	1	2.41162	2.21914
		HECTD2	1	7.6211	29.6508
		HEPACAM	1	4	6.54322
		HGF	1	27.4741	14.3204
		HIF1A	1	4.16986	29.2426
		HK1	1	1.97247	3.38698
		HNF4G	1	4.19887	3.89062
		HNRNPH3	1	1.38511	2.08493
		HNRNPLL	1	1.53688	2.07053
		HOMER1	1	1.6358	2.47942
		HPSE2	1	3.53081	3.45815
		HSF1	1	2.14355	2.31338
		HSP90AA1	1	1.97247	2.36199
		HSPA13	1	1.65864	3.16017
		HSPA4	1	2.08493	2.2974
		HSPB6	1	27.0958	25.8125
		HSPB7	1	109.137	216.767
		HSPH1	1	3.05252	2.39496
		HTR1B	1	18.6357	50.5626
		HTR2A	1	10.5561	28.0514
		HTR3B	1	5.81589	4.72397
		HUNK	1	1.84038	2.96905
		IBTK	1	2.08493	2.94854
		IFRD1	1	2.46229	2.60268
		IFT81	1	3.29436	3.73213
		IGF1R	1	2.01391	4.14106
		IGF2R	1	2.92817	4.56305
		IL17B	1	43.7133	122.786
		IL5RA	1	1.82766	2.77022
		ILK	1	2.15846	2.44528
		IMPAD1	1	1.53688	2.02792
		INO80D	1	1.36604	2.11404
		INPP4A	1	6.45313	28.6408
		INSC	1	3.73213	5.50217
		INSRR	1	1.67018	2.58471
		IQCF3	1	5.02805	7.72749
		ITGA1	1	2.71321	3.13834
		ITGA10	1	20.6776	31.5594
		ITGA8	1	142.025	227.544
		ITGAV	1	3.605	9.64646
		ITGB1	1	4.34694	5.73582
		ITGB1BP2	1	33.3589	29.2426
		ITGB6	1	1.43396	2.12874
		ITIH2	1	4.05584	17.0299
		ITPR1	1	3.63008	8.22491
		JAM3	1	2.88786	2.58471
		JPH1	1	7.26015	7.56846
		JPH2	1	16.9123	13.9288
		KCNA1	1	2.82843	4.85678
		KCNA10	1	2.41162	4.59479
		KCNA2	1	9.44794	10.8528
		KCNA5	1	3.605	6.45313
		KCNA6	1	3.97237	8.87656
		KCNAB1	1	26.7228	47.1766
		KCNH2	1	85.0359	66.257
		KCNIP1	1	1.44393	2.32947
		KCNJ14	1	2.12874	2.36199
		KCNJ8	1	2.44528	1.98618
		KCNK3	1	3.31728	4.72397
		KCNMA1	1	21.1121	43.7133
		KCNMB1	1	5.46416	6.72717
		KCNS1	1	2.63902	3.07375
		KCNT2	1	82.7106	95.6704
		KCTD16	1	7.83536	6.23332
		KCTD19	1	1.39474	2.07053
		KDM2A	1	1.48452	2.09943
		KDM3B	1	1.58008	2.17347
		KIAA1430	1	1.70527	2.46229
		KIAA1671	1	2.31338	6.9644
		KIAA1715	1	1.81504	3.605
		KIF26B	1	6.9644	11.7942
		KLHL11	1	1.72907	3.20428
		KLHL32	1	7.1602	10.8528
		KLRG1	1	2.20381	5.27803
		KMO	1	3.29436	4
		LBH	1	4.19887	4.34694
		LDB3	1	1.60214	2.25012
		LDLRAD4	1	3.11666	4.85678
		LEO1	1	2.34567	2.75108
		LGALS8	1	1.44393	2.34567
		LIN7C	1	2.92817	2.60268
		LMCD1	1	8.81524	95.6704
		LMOD1	1	40.7859	30.0647
		LOC100009168	1	18.2522	221.322
		LOC100009439	1	26.7228	35.0174
		LOC100009453	1	3.73213	7.83536
		LOC100009462	1	1.89212	2.20381
		LOC100101568	1	2.28153	2.32947
		LOC100101599	1	1.6245	2.01391
		LOC100328624	1	1.68179	2.47942
		LOC100338575	1	1.72907	2.37841
		LOC100338621	1	1.85318	2.47942
		LOC100339205	1	6.10504	4.11246
		LOC100339409	1	1.81504	2.94854
		LOC100339625	1	4.11246	7.94474
		LOC100340629	1	1.89212	2.71321
		LOC100340790	1	6.72717	5.50217
		LOC100340950	1	1.87905	2.05623
		LOC100341037	1	2.44528	3.55537
		LOC100341053	1	4.75683	3.81055
		LOC100341224	1	2.37841	3.73213
		LOC100341474	1	7.51618	13.8326
		LOC100342119	1	6.32033	7.01285
		LOC100342234	1	2.9897	2.92817
		LOC100342597	1	2.18859	2
		LOC100343144	1	4.82323	4.53154
		LOC100344298	1	1.82766	2.07053
		LOC100344592	1	1.53688	2.75108
		LOC100345356	1	1.65864	2.37841
		LOC100345591	1	2.28153	2.09943
		LOC100345689	1	5.46416	19.1597
		LOC100345989	1	2.15846	1.87905
		LOC100346386	1	3.34035	6.6807
		LOC100346587	1	2.34567	2.07053
		LOC100348376	1	4.99332	4.05584
		LOC100348758	1	9.25351	8.9383
		LOC100348818	1	4.05584	8.28212
		LOC100349066	1	2.18859	1.91853
		LOC100349303	1	1.84038	2.09943
		LOC100349887	1	4.34694	4.65893
		LOC100349957	1	1.8025	2.65737
		LOC100350168	1	3.05252	2.73208
		LOC100350177	1	6.72717	11.5514
		LOC100350431	1	2.12874	2.18859
		LOC100350959	1	1.59107	2
		LOC100351057	1	1.69349	2.23457
		LOC100351977	1	3.53081	3.65533
		LOC100352107	1	2.94854	3.05252
		LOC100352612	1	3.91768	5.1337
		LOC100352628	1	2.05623	2.39496
		LOC100354037	1	10.1261	6.23332
		LOC100354058	1	2.17347	2.25012
		LOC100354204	1	1.6358	2.32947
		LOC100354871	1	1.49485	2.08493
		LOC100354896	1	2.11404	1.75321
		LOC100356321	1	2.26577	1.98618
		LOC100356678	1	4.14106	3.81055
		LOC100356928	1	1.37554	2.02792
		LOC100357121	1	9.06307	46.8507
		LOC100357403	1	1.45397	2.05623
		LOC100357441	1	2	2.96905
		LOC100357717	1	6.23332	11.4716
		LOC100357943	1	2.18859	2.15846
		LOC100358146	1	1.6358	2.09943
		LOC100358455	1	2.15846	2.56685
		LOC100359229	1	1.40444	2.05623
		LOC103347071	1	3.22657	4.16986
		LOC103347173	1	8.45614	11.5514
		LOC103347242	1	2.32947	4.22807
		LOC103347895	1	2.47942	3.29436
		LOC103348625	1	1.60214	2.12874
		LOC103350907	1	1.90528	2.56685
		LOC103350969	1	1.36604	2.01391
		LOX	1	4.62675	9.12611
		LOXL3	1	2.75108	3.83706
		LRCH2	1	2.39496	5.02805
		LRRC1	1	2	2.12874
		LRRC16A	1	5.73582	14.0257
		LRRC59	1	2	2.21914
		LRRC7	1	1.85318	2.08493
		LRRFIP2	1	1.52626	2.36199
		LRRIQ1	1	3.4822	6.19026
		LTBP1	1	10.4831	7.94474
		LUZP1	1	2.20381	3.01049
		LYZL4	1	5.6962	6.02099
		MACF1	1	2.32947	2.31338
		MACROD2	1	2.46229	3.07375
		MAMDC2	1	29.6508	23.1029
		MAN1A2	1	2.05623	2.28153
		MANSC1	1	2.41162	2.67586
		MAP1B	1	9.78112	8.39773
		MAP2	1	4.78991	4.82323
		MAP2K4	1	1.82766	2.69447
		MAP3K2	1	2.04202	2.58471
		MAP4K3	1	1.97247	3.36359
		MAPK4	1	3.27161	4.37717
		MAPK6	1	3.63008	11.3137
		MAPK8	1	2.21914	2.67586
		MARK1	1	5.24157	6.40856
		MAT2A	1	2.04202	2.62079
		MAT2B	1	2.49666	2.67586
		MATN1	1	2.17347	3.41054
		MATN4	1	2.21914	2.8481
		MBNL1	1	1.79005	2.41162
		MBOAT1	1	4.75683	15.2422
		MCL1	1	1.71713	2.9897
		MCOLN2	1	2.56685	2.26577
		ME1	1	3.70635	2.63902
		ME3	1	3.01049	3.05252
		MECP2	1	1.50525	2.15846
		MED13L	1	1.59107	2.69447
		MED30	1	2.34567	2.20381
		MEF2D	1	1.60214	2.96905
		MEIS1	1	2.05623	2.34567
		MEP1B	1	1.93187	2.37841
		MERTK	1	10.1965	19.2929
		MFAP3L	1	4.78991	8.63383
		MFAP4	1	3.13834	8.05564
		MFGE8	1	2.69447	2.37841
		MFSD2A	1	3.09513	12.2101
		MFSD9	1	2.63902	6.36429
		MGARP	1	2.54912	2.9897
		MGP	1	2.36199	2.18859
		MGRN1	1	1.53688	2.53151
		MICU3	1	5.06303	12.042
		MIER1	1	1.89212	4.50023
		MMP24	1	1.75321	2.08493
		MORC1	1	3.605	6.1475
		MOV10L1	1	3.53081	3.78423
		MPDZ	1	3.55537	2.86791
		MPP7	1	2	4.89056
		MPPED2	1	4.31691	3.55537
		MRAS	1	3.01049	3.91768
		MROH2B	1	1.98618	2.12874
		MRVI1	1	18.6357	16.1113
		MSANTD2	1	1.90528	3.20428
		MSN	1	2.23457	3.27161
		MSRB3	1	5.85634	7.46426
		MTFMT	1	1.48452	2.25012
		MTMR7	1	4.53154	4.11246
		MTUS2	1	4.31691	8.39773
		MUL1	1	2.18859	2.15846
		MXD1	1	1.38511	2.05623
		MYEF2	1	1.70527	2.31338
		MYH1	1	2.04202	2.08493
		MYH11	1	21.5557	30.91
		MYH9	1	6.27667	4.46915
		MYL9	1	6.6807	9.25351
		MYLIP	1	3.83706	7.67411
		MYLK	1	23.2636	22.7848
		MYLK4	1	1.46409	2.12874
		MYO18B	1	3.36359	11.2356
		MYO1D	1	6.58873	37.7918
		MYO9B	1	2.31338	3.83706
		MYOM1	1	37.014	38.0546
		MYOZ2	1	24.4201	23.7524
		MYT1L	1	40.7859	37.2715
		N4BP2L2	1	1.98618	2.32947
		NAA15	1	1.60214	2.9897
		NAALADL2	1	2.41162	3.29436
		NABP1	1	2.8481	2.69447
		NAP1L1	1	2.21914	2.2974
		NAPB	1	1.85318	2.20381
		NDE1	1	1.60214	2.04202
		NDNF	1	1.71713	2.54912
		NDUFAF4	1	1.70527	2.17347
		NEK10	1	4.37717	3.20428
		NEK7	1	2.82843	3.07375
		NEMF	1	1.56917	2.02792
		NET1	1	2.28153	4.50023
		NETO2	1	7.83536	12.996
		NEUROG1	1	1.87905	2.34567
		NFXL1	1	2.46229	2.37841
		NGDN	1	1.79005	2.02792
		NIM1K	1	28.0514	13.2691
		NKAIN1	1	1.47427	2.42839
		NKD1	1	13.737	8.28212
		NLGN2	1	2.37841	2.94854
		NLGN3	1	3.65533	2.78949
		NMD3	1	1.70527	2.34567
		NOL11	1	1.65864	2.09943
		NOV	1	26.3549	15.455
		NOX4	1	12.5533	30.4844
		NOXRED1	1	2.94854	3.53081
		NPAS4	1	20.2521	13.737
		NPHS2	1	2.04202	2.71321
		NPTN	1	2.49666	2.8481
		NPY1R	1	19.8353	11.8762
		NR4A3	1	5.89708	22.1618
		NSMCE2	1	1.91853	2.46229
		NSRP1	1	1.91853	2.09943
		NSUN6	1	2.26577	1.85318
		NT5C1A	1	2.60268	2.75108
		NT5DC3	1	2.28153	2.34567
		NT5E	1	12.4666	32.8996
		NXN	1	2.80889	4.95883
		NXPE3	1	2.47942	2.86791
		OAZ3	1	1.86607	2.44528
		ODF2L	1	2.11404	2.01391
		OGN	1	3.97237	4.16986
		OLFM3	1	54.5686	61.8199
		OMA1	1	4.69134	4.02782
		ONECUT1	1	4.43828	4.14106
		OPTC	1	2.44528	3.78423
		OR51I2	1	2.8481	3.18215
		ORM1	1	1.56917	2.56685
		OSBPL8	1	1.94531	2.58471
		OTUD7A	1	1.6358	2.75108
		P2RY14	1	1.53688	2.23457
		PABPC5	1	2.92817	3.03143
		PACSIN2	1	2.39496	3.45815
		PAK1IP1	1	2	2.53151
		PALLD	1	15.3482	20.9663
		PALM2	1	10.0561	13.9288
		PAPPA2	1	12.5533	14.0257
		PAPSS1	1	1.48452	2.07053
		PAPSS2	1	3.50642	4.50023
		PARM1	1	3.5801	3.03143
		PARP8	1	4.14106	4.19887
		PAWR	1	8.69388	6.27667
		PAXBP1	1	1.64718	2.15846
		PBV1SPCR2	1	34.2968	31.5594
		PCDH7	1	18.0009	23.7524
		PCNXL2	1	1.95884	2.46229
		PCSK2	1	6.6807	15.7797
		PDCD10	1	1.65864	2.37841
		PDCL3	1	2.73208	3.43426
		PDE1A	1	5.89708	9.25351
		PDE3A	1	4.82323	5.54044
		PDE4D	1	3.97237	9.98664
		PDE5A	1	3.36359	3.41054
		PDE6C	1	2.08493	1.76541
		PDLIM2	1	4.05584	3.86375
		PDLIM3	1	30.4844	16.9123
		PDP1	1	2.17347	2.07053
		PDXDC1	1	1.68179	2.54912
		PDZD4	1	12.6407	13.8326
		PEAK1	1	2.51403	5.09824
		PERP	1	4.62675	6.54322
		PFDN4	1	2.92817	2.90795
		PFKP	1	9.00047	20.393
		PFN1	1	1.44393	2.02792
		PGM5	1	4.89056	15.2422
		PHAX	1	1.71713	2
		PHLDA1	1	2.69447	8
		PHTF2	1	6.1475	10.7034
		PI4K2A	1	2.12874	2.67586
		PIANP	1	2.26577	2.21914
		PIAS2	1	1.86607	3.16017
		PIK3CA	1	1.86607	2.20381
		PITPNB	1	1.98618	2.9897
		PJA2	1	1.49485	2.08493
		PKD1	1	3.22657	3.41054
		PKD2	1	1.91853	4.53154
		PKM	1	1.70527	3.03143
		PKN2	1	2.31338	2.12874
		PLA2G12B	1	1.54756	2.05623
		PLA2G4E	1	2.02792	3.45815
		PLCL1	1	5.65685	5.46416
		PLEKHG5	1	4.43828	3.55537
		PLEKHO1	1	2.42839	3.70635
		PLGRKT	1	2.73208	3.01049
		PLN	1	83.2859	44.6318
		PLOD2	1	2.90795	4.72397
		PLS3	1	2.60268	4.11246
		PLXNB1	1	4.02782	3.36359
		PNCK	1	7.6211	12.042
		PNMA1	1	1.90528	2.26577
		POLK	1	2.01391	2.39496
		POMGNT1	1	2.02792	2.42839
		PORCN	1	1.56917	2.07053
		POU2F1	1	1.46409	2.11404
		PPAPDC1A	1	5.31474	5.61778
		PPM1K	1	4.02782	2.8481
		PPP1CB	1	2.78949	3.29436
		PPP1R9A	1	2.21914	3.01049
		PPP2R5E	1	1.89212	2.15846
		PPP3CC	1	2.96905	5.06303
		PPP4R2	1	1.7411	2.65737
		PPP6R3	1	2.2974	2.02792
		PPT1	1	1.67018	2.14355
		PRDM6	1	15.8895	9.00047
		PRKAA2	1	3.65533	6.45313
		PRKAB2	1	2.62079	4.19887
		PRKAG3	1	2.42839	2.75108
		PRKCA	1	1.76541	3.31728
		PRKG1	1	13.1775	14.5203
		PROS1	1	2.08493	2.34567
		PRRT1	1	2.20381	2.88786
		PRRT3	1	2.46229	2
		PRSS23	1	3.01049	4.08405
		PRUNE2	1	41.3553	41.0696
		PSMG1	1	1.54756	2
		PTBP2	1	2.14355	2.31338
		PTCHD1	1	9.00047	7.88986
		PTH1R	1	1.76541	2.62079
		PTPDC1	1	3.94493	6.82108
		PTPN11	1	1.91853	2.07053
		PTPRD	1	14.1232	13.0864
		PXYLP1	1	3.07375	3.20428
		PYGL	1	4.82323	3.78423
		RAB15	1	2.46229	2.65737
		RAB23	1	4.56305	3.5801
		RAB3GAP2	1	1.85318	2.39496
		RAB6A	1	1.85318	2.15846
		RABGAP1L	1	2.71321	3.34035
		RAI14	1	4.37717	3.97237
		RAP1A	1	1.41421	2.05623
		RAPGEF5	1	1.87905	3.68075
		RASA2	1	2.04202	2.73208
		RASL11A	1	1.39474	2.09943
		RASL11B	1	3.86375	2.75108
		RASSF2	1	2.90795	4.05584
		RB1	1	1.45397	2.04202
		RBM11	1	2.60268	2.9897
		RBM27	1	1.94531	2.12874
		RBM34	1	1.51572	2.05623
		RBPMS	1	2.63902	4.69134
		RBPMS2	1	1.81504	2.78949
		RCHY1	1	2.15846	2.21914
		REC8	1	3.68075	12.7286
		RECK	1	4.59479	5.16941
		REEP3	1	3.38698	6.9644
		REG4	1	2.25012	2.2974
		REXO2	1	2.78949	3.20428
		RFX7	1	2.51403	3.20428
		RGS1	1	8.81524	38.5859
		RGS5	1	42.5179	44.9422
		RHBDL2	1	2.63902	7.88986
		RIC8B	1	2.2974	2.23457
		RLA-DR-ALPHA	1	3.36359	2.51403
		RLF	1	2.07053	3.13834
		RLN1	1	2.37841	4.31691
		RNASE1	1	2.01391	5.24157
		RNF144B	1	1.89212	3.91768
		RNF149	1	1.90528	3.78423
		RNF150	1	3.29436	3.11666
		RNGTT	1	1.82766	2.15846
		ROBO2	1	19.9733	16
		ROCK1	1	4.82323	3.94493
		ROCK2	1	2	2.94854
		ROM1	1	2.42839	3.09513
		RPRD1B	1	1.54756	2.11404
		RRM2B	1	2.32947	1.93187
		RSBN1	1	1.72907	3.65533
		RSBN1L	1	2.54912	3.63008
		RSF1	1	1.58008	2.15846
		RSL24D1	1	2.42839	2.41162
		RSU1	1	2.47942	2.94854
		RWDD2A	1	3.43426	17.7531
		RYR2	1	17.7531	25.6342
		RYR3	1	76.1093	58.0812
		S100A3	1	2.23457	2.07053
		SAMD7	1	2.49666	4.78991
		SAV1	1	1.59107	2.67586
		SBDS	1	2.01391	2.51403
		SCGB1C1	1	3.45815	3.09513
		SCN1B	1	1.85318	3.97237
		SCN8A	1	4.69134	4.14106
		SEC23A	1	2.32947	2.77022
		SEC31A	1	1.7411	2.07053
		SEC63	1	2.02792	2.49666
		SEH1L	1	1.91853	2.77022
		SEL1L2	1	2.09943	1.84038
		SELK	1	1.77769	2.02792
		SELM	1	3.11666	3.4822
		SEMA4F	1	2.39496	2.82843
		SEMA6D	1	2.04202	4.08405
		SENP5	1	1.49485	2.05623
		SERPINE2	1	19.5622	14.2215
		SERPINI1	1	37.2715	36.7583
		SEZ6	1	2.71321	2.96905
		SGCA	1	44.9422	57.68
		SGCB	1	3.75809	2.75108
		SGCD	1	6.54322	10.5561
		SGCE	1	2.15846	2.01391
		SGMS1	1	2.09943	2.69447
		SKIL	1	3.50642	4.43828
		SLC12A1	1	1.95884	3.16017
		SLC14A2	1	2.31338	2.56685
		SLC16A7	1	2.42839	2.80889
		SLC17A1	1	1.7411	2.41162
		SLC17A4	1	5.20537	6.9163
		SLC18A1	1	2.26577	2.90795
		SLC18A3	1	2.31338	4.31691
		SLC18B1	1	2.44528	2.75108
		SLC20A2	1	1.55833	2.17347
		SLC22A2	1	2.62079	7.01285
		SLC22A3	1	2.07053	3.55537
		SLC25A30	1	2.28153	2.08493
		SLC25A31	1	1.8025	2.21914
		SLC25A32	1	1.71713	2.78949
		SLC35B3	1	1.72907	2.69447
		SLC35C2	1	2.34567	2.28153
		SLC35F1	1	2.60268	2.20381
		SLC38A11	1	6.02099	20.1122
		SLC39A6	1	2.41162	5.57897
		SLC41A2	1	3.91768	4.08405
		SLC44A2	1	2.04202	2.05623
		SLC4A7	1	3.07375	5.46416
		SLC7A1	1	2.02792	5.06303
		SLC7A2	1	4.14106	8.45614
		SLIT2	1	3.78423	6.45313
		SLMAP	1	29.6508	18.2522
		SMAD3	1	1.6245	2.42839
		SMAD5	1	1.44393	2.15846
		SMARCA1	1	3.4822	7.94474
		SMARCA5	1	2.39496	5.20537
		SMARCE1	1	2.15846	1.91853
		SMOC2	1	4.89056	8.81524
		SMTNL2	1	6.1475	18.8959
		SNTA1	1	3.09513	4.95883
		SNX4	1	2.05623	1.97247
		SNX7	1	2.67586	3.73213
		SOCS4	1	1.58008	2.49666
		SORBS2	1	16.1113	9.12611
		SOX1	1	2.71321	4.92458
		SOX6	1	1.70527	2.23457
		SPAG17	1	2.14355	2.26577
		SPARCL1	1	11.3924	18.1261
		SPATA24	1	2.09943	2.42839
		SPATA5	1	1.58008	2.15846
		SPEM1	1	4.92458	8.33973
		SPIRE1	1	2	3.13834
		SPP1	1	25.1067	118.603
		SPRTN	1	1.7411	2.31338
		SRCRB4D	1	2.25012	2.26577
		SRSF12	1	3.68075	10.9283
		SRSF5	1	1.70527	3.01049
		SSPN	1	2	2.17347
		ST3GAL5	1	2.86791	3.63008
		STAC2	1	11.7127	15.0324
		STC2	1	2.78949	4.56305
		STEAP1	1	5.57897	13.8326
		STEAP2	1	4.05584	10.5561
		STK17A	1	2.54912	3.86375
		STK24	1	1.53688	2.56685
		STK33	1	2.67586	2.09943
		STK38L	1	3.83706	6.6807
		STK39	1	2.71321	3.24901
		STRIP1	1	1.93187	2.14355
		STX7	1	1.89212	2.69447
		SUB1	1	1.97247	3.16017
		SUSD5	1	3.4822	3.01049
		SYCP2L	1	1.97247	3.41054
		SYNPO2	1	24.9333	31.779
		SYPL2	1	6.06287	6.02099
		TAC1	1	2.63902	5.65685
		TACC2	1	3.07375	5.1337
		TACSTD2	1	1.91853	2.21914
		TAF1A	1	2.39496	2.46229
		TAF4B	1	2.60268	4.43828
		TANK	1	2.46229	2.67586
		TASP1	1	1.97247	2.71321
		TBC1D23	1	2.67586	2.36199
		TBC1D2B	1	1.94531	2.44528
		TBC1D8B	1	8.51496	6.49802
		TBXAS1	1	1.71713	2.94854
		TCEAL1	1	2.08493	1.72907
		TCEB1	1	2.2974	3.13834
		TCERG1	1	1.75321	2.96905
		TCF23	1	2.94854	7.94474
		TCF7L2	1	2	4.40762
		TCTE3	1	3.43426	7.26015
		TEAD3	1	9.25351	17.2677
		TES	1	29.2426	42.8137
		TESK2	1	2.47942	2.21914
		TEX11	1	7.94474	14.9285
		TFG	1	1.60214	2.90795
		TFPI	1	3.34035	3.38698
		TFRC	1	2.88786	6.82108
		TGFB1I1	1	7.26015	6.58873
		THEMIS	1	3.70635	3.13834
		THOC2	1	2.18859	1.79005
		TIFA	1	3.75809	20.1122
		TIGIT	1	5.27803	4.56305
		TIMP1	1	3.68075	15.0324
		TLR6	1	5.06303	5.65685
		TM4SF20	1	1.56917	2.07053
		TMC1	1	1.76541	2.20381
		TMED7	1	2.46229	1.94531
		TMEM108	1	2.58471	2.42839
		TMEM117	1	4.22807	3.45815
		TMEM136	1	3.70635	4.05584
		TMEM178A	1	4.46915	5.50217
		TMEM26	1	10.1261	10.1261
		TMEM39A	1	1.58008	2.11404
		TMEM63C	1	1.7411	2.2974
		TMF1	1	1.75321	2.65737
		TMIGD1	1	3.605	5.54044
		TMPRSS11D	1	1.58008	2.14355
		TMTC3	1	2.15846	2.53151
		TNFRSF11B	1	9.25351	22.1618
		TNFSF13B	1	9.18959	6.49802
		TNIK	1	1.61328	2.54912
		TNNC1	1	10.4831	14.8254
		TNNC2	1	11.7127	13.1775
		TNNI2	1	1.81504	2.01391
		TNNT2	1	7.72749	12.4666
		TPD52L1	1	4.92458	6.9163
		TPM1	1	11.6318	13.737
		TPM2	1	40.2244	60.1295
		TPM4	1	2.2974	1.93187
		TPMT	1	1.52626	2.54912
		TRABD2B	1	2.23457	2
		TRAF3	1	2.32947	2.04202
		TRAFD1	1	1.75321	2.82843
		TRIM72	1	3.16017	3.83706
		TRPC1	1	3.89062	4.05584
		TRPM3	1	2.28153	1.84038
		TSPAN2	1	2.9897	7.78124
		TUB	1	2.20381	2.2974
		TUSC3	1	29.6508	19.2929
		TXNRD1	1	1.65864	2.62079
		TYR	1	2.92817	8.05564
		TYRO3	1	6.32033	5.35171
		UBE2E2	1	2.58471	2.02792
		UBE2W	1	2.07053	3.01049
		UCMA	1	4.72397	3.5801
		UFL1	1	2.09943	2.62079
		UGGT2	1	2.39496	2.86791
		UPK1A	1	6.36429	4
		USP28	1	2.09943	2.51403
		USP42	1	2.77022	3.83706
		USP45	1	1.68179	2.28153
		USP53	1	6.63456	20.5348
		USP54	1	1.68179	3.20428
		VAMP4	1	1.46409	2.17347
		VCAN	1	4.16986	2.96905
		VCL	1	12.9063	11.2356
		VEZT	1	2.34567	4.05584
		VIMP	1	1.97247	2.75108
		VPREB1	1	3.97237	3.73213
		VPREB2	1	1.89212	2.9897
		VPS37A	1	1.68179	2.62079
		VRK2	1	1.48452	2.18859
		WASL	1	1.75321	2.94854
		WBP5	1	1.81504	2.34567
		WBSCR28	1	2.12874	2.75108
		WDFY3	1	2.2974	2.60268
		WDR1	1	1.55833	2.25012
		WDR12	1	1.59107	2.65737
		WDR47	1	2.60268	4.89056
		WDR7	1	1.65864	2.69447
		WDR96	1	3.09513	4.05584
		WFDC3	1	1.94531	2.62079
		WHSC1L1	1	1.81504	2.90795
		WISP1	1	1.8025	2.44528
		WNT8A	1	8.81524	9.57983
		WRNIP1	1	2.63902	3.05252
		WWP2	1	6.77396	11.0809
		XPNPEP2	1	4.89056	4.16986
		YAP1	1	3.03143	8.28212
		YWHAH	1	1.58008	2.53151
		ZBED9	1	2.21914	1.87905
		ZBTB10	1	1.53688	2.01391
		ZBTB16	1	2.63902	4.19887
		ZBTB32	1	1.60214	2.94854
		ZC2HC1A	1	2.36199	2.28153
		ZC3H14	1	1.97247	4.59479
		ZCCHC16	1	6.19026	5.06303
		ZCWPW2	1	2.63902	2.49666
		ZDHHC17	1	1.45397	2.05623
		ZDHHC23	1	1.65864	2.02792
		ZFAND6	1	2.08493	2.69447
		ZFX	1	1.44393	2.09943
		ZHX3	1	2.51403	3.50642
		ZKSCAN1	1	2.51403	2.51403
		ZMPSTE24	1	1.52626	2.28153
		ZNF214	1	2.31338	2.04202
		ZNF275	1	1.85318	2.34567
		ZNF287	1	2.20381	1.85318
		ZNF292	1	2.37841	2.15846
		ZNF326	1	2.02792	3.16017
		ZNF385D	1	11.8762	10.6295
		ZNF451	1	1.6245	2.07053
		ZNF644	1	2.36199	2.42839
		ZNF652	1	2.96905	4.22807
		ZNF804B	1	3.43426	3.29436
		ZNRF3	1	2.75108	2.47942
		ZRSR2	1	1.84038	3.5801
		ZZEF1	1	2.54912	2.71321

## Sheet: Cluster 4
		GeneSymbol	AS0	Fold (AS30/AS0)	Fold (AS60/AS0)
		ATG4C	1	2.46229	1.79005
		LECT1	1	7.26015	3.68075
		ANKRD1	1	24.9333	6.9644
		SLC8A1	1	2.8481	2
		CCDC88A	1	4.02782	2.46229
		PRELP	1	9.71356	5.06303
		CTNNA3	1	2.51403	1.38511
		PRDM5	1	3.05252	1.61328
		PTH	1	18.8959	5.57897
		CCDC102B	1	3.43426	1.45397
		IFT74	1	2.41162	1.77769
		ADAMTS6	1	4.85678	2
		B4GALT5	1	2.56685	1.40444
		C17H14ORF37	1	3.05252	2.04202
		NUDT9	1	2.08493	1.46409
		LMO4	1	3.89062	2.56685
		BOC	1	2.42839	1.48452
		STX2	1	2.02792	1.51572
		FKBP1B	1	2.63902	1.68179
		PLA2R1	1	2.8481	1.77769
		RAB38	1	11.4716	4.92458
		TGFB3	1	3.81055	1.84038
		HAND2	1	11.7942	4.56305
		CCDC104	1	2.32947	1.6358
		KCNB2	1	3.50642	1.85318
		GFRA1	1	5.16941	3.27161
		HN1	1	2	1.21419
		MCP2	1	69.0706	16.2234
		FAM114A1	1	3.31728	2.07053
		ACTL6B	1	2.07053	1.40444
		POSTN	1	12.7286	4.53154
		MVB12B	1	2.49666	1.46409
		ENTPD6	1	2.69447	1.71713
		FBLIM1	1	2.96905	1.85318
		DDHD2	1	2.12874	1.6245
		FAM81A	1	8.75435	2.65737
		FABP3	1	7.72749	2.82843
		POGZ	1	3.34035	1.75321
		KRT27	1	2.69447	1.84038
		DPEP2	1	2.51403	1.36604
		LOC100343332	1	3.50642	1.65864
		C12H6ORF165	1	3.27161	1.89212
		ZNF226	1	4.69134	1.94531
		REPS2	1	3.18215	2.28153
		C1GALT1C1	1	2.17347	1.71713
		MIP	1	5.93809	2.11404
		PKDCC	1	2.54912	1.51572
		MLLT11	1	20.8215	6.40856
		EIF2A	1	2.39496	1.77769
		BBX	1	2.34567	1.70527
		FAM46B	1	13.1775	3.73213
		GGPS1	1	2.51403	1.76541
		C14H3ORF52	1	42.8137	5.50217
		PPP1R14D	1	2.63902	1.39474
		MMP14	1	6.40856	2.63902
		IPO9	1	2.15846	1.43396
		ALCAM	1	7.1602	3.05252
		RYR1	1	2.88786	1.76541
		SFMBT2	1	2.80889	1.56917
		FCHSD2	1	3.31728	1.94531
		SOST	1	22.1618	8.28212
		PRKACB	1	3.4822	2
		KCTD8	1	29.8571	11.6318
		LYRM7	1	2.54912	1.40444
		C15H4ORF32	1	2.8481	1.8025
		DNAJC27	1	2.18859	1.41421
		ZNF213	1	2.15846	1.48452
		SHOX2	1	11.4716	3.73213
		SLC16A9	1	4.11246	2.69447
		FILIP1L	1	5.89708	2.58471
		IAPP	1	3.65533	1.95884
		MCU	1	4.37717	2.69447
		ASB11	1	2.67586	1.31039
		ARMCX2	1	2.69447	1.6358
		GOLGA1	1	2.15846	1.69349
		SH3D19	1	3.94493	2.32947
		LOC100356976	1	2.34567	1.38511
		AOAH	1	2.67586	1.32869
		HIP1	1	5.09824	2.49666
		CCDC109B	1	3.13834	2.05623
		B3GALTL	1	3.78423	2.32947
		NCAM1	1	4.14106	2.51403
		ROBO1	1	2.9897	1.61328
		OSBP2	1	4.25748	2.44528
		LIMD1	1	2.20381	1.77769
		RASSF4	1	3.78423	2.18859
		FAM171B	1	4.50023	2.08493
		ANAPC1	1	2.44528	1.44393
		DOCK8	1	3.38698	2.04202
		HSPB2	1	7.83536	3.50642
		CWC27	1	2.80889	2.01391
		ST8SIA3	1	3.86375	1.7411
		LSM5	1	2.34567	1.7411
		KIF5C	1	8.28212	3.53081
		DACT1	1	5.61778	2.60268
		FAM46A	1	6.45313	3.50642
		CSRNP3	1	2.54912	1.72907
		KPNA5	1	2.15846	1.45397
		PIGR	1	30.91	3.94493
		LOC100339500	1	2.14355	1.6358
		PPP1R21	1	2.46229	1.68179
		WDR44	1	2.09943	1.70527
		CCDC89	1	2.25012	1.43396
		UPB1	1	4.95883	1.8025
		LOC100008770	1	5.38893	3.41054
		LOC100359207	1	4.25748	1.6358
		TRIQK	1	2.77022	1.58008
		BMP4	1	2.25012	1.54756
		HRG	1	84.4485	4.59479
		TRAPPC6B	1	2.28153	1.72907
		ARG2	1	3.75809	2.49666
		ZNF362	1	2.80889	1.3566
		NEK9	1	2.08493	1.22264
		NEDD9	1	5.20537	2.94854
		KCTD4	1	5.27803	2.75108
		SCAI	1	2.23457	1.64718
		SIPA1L3	1	2.94854	1.7411
		SLC17A9	1	2.25012	1.76541
		TTR	1	11.3137	3.91768
		MYBL1	1	3.68075	1.60214
		TRIM69	1	2.75108	1.41421
		DDX25	1	19.9733	5.09824
		SULT3A1	1	24.4201	2.62079
		LOC100356378	1	12.7286	4.11246
		POGLUT1	1	2.05623	1.41421
		CH25H	1	2.15846	1.31039
		TBX20	1	3.65533	2.14355
		LOC100340061	1	2.77022	1.58008
		TMEM35	1	4.37717	2
		KY	1	3.29436	2.17347
		TMEM196	1	4.82323	2.01391
		ZMAT3	1	3.24901	1.67018
		SHC4	1	2.37841	1.6245
		NGB	1	15.8895	5.46416
		BGN	1	13.2691	6.06287
		RND3	1	2.11404	1.30134
		LOC100353477	1	3.5801	1.54756
		KLHL20	1	2.04202	1.68179
		CGREF1	1	4.89056	2.12874
		LOC100355323	1	2.11404	1.37554
		SERTAD4	1	6.82108	2.51403
		CHST10	1	2.07053	1.3566
		ZNF174	1	2.07053	1.51572
		ABHD1	1	2.07053	1.23114
		CAMK2G	1	3.11666	1.85318
		ZNF346	1	2.02792	1.27456
		ENPP6	1	4.28709	2.37841
		EIF5A2	1	6.6807	2.58471
		CEP97	1	2.28153	1.58008
		MMP16	1	5.57897	1.98618
		FBXW12	1	4.92458	2.69447
		FBXO30	1	3.97237	2.36199
		DYNLT3	1	2.37841	1.8025
		FAM150A	1	6.10504	2.09943
		PLXNB2	1	2.09943	1.43396
		AGAP3	1	4.72397	2.42839
		SEL1L2	1	3.91768	1.81504
		SCG3	1	2.65737	1.90528
		PRKCI	1	2.32947	1.25701
		NTN4	1	3.50642	2.42839
		GORAB	1	2.02792	1.33793
		OTOR	1	11.9588	3.5801
		CAND2	1	4.59479	2.49666
		TH	1	9.06307	2.07053
		WDR35	1	2.67586	1.37554
		ST6GAL2	1	88.0347	11.6318
		CCDC42	1	3.20428	2.07053
		STK40	1	3.97237	2.53151
		42258	1	3.11666	2.17347
		NMB	1	3.38698	1.46409
		ANTXR1	1	4.05584	2.44528
		WRN	1	2.25012	1.31951
		UGT2B16	1	3.91768	1.60214
		ACTL7B	1	2.26577	1.56917
		CASC4	1	2.42839	1.84038
		PPP1R3C	1	15.8895	6.72717
		G3BP2	1	2.14355	1.72907
		MNS1	1	2.88786	1.82766
		ZNF274	1	2.04202	1.41421
		LCAT	1	2.2974	1.67018
		FSTL1	1	2.02792	1.33793
		RWDD3	1	2.01391	1.55833
		ZNF483	1	3.91768	1.8025
		PTAFR	1	3.07375	1.56917
		GALNT16	1	2.20381	1.26576
		LOC100352682	1	2.17347	1.58008
		SOX9	1	2.02792	1.3566
		CCDC39	1	3.01049	2.11404
		BZW2	1	2.36199	1.79005
		CCDC110	1	43.1115	15.2422
		FAM219B	1	2.14355	1.33793
		FBXL22	1	2.94854	1.87905
		ZNF605	1	2.17347	1.38511
		ANO4	1	44.0173	5.06303
		DZIP1	1	6.45313	3.63008
		SLCO1C1	1	3.11666	2.28153
		LOC100346416	1	4.40762	2.07053
		RAB11FIP3	1	2.28153	1.42405
		SLC46A1	1	2.69447	1.41421
		POU6F1	1	3.03143	1.97247
		BCL9	1	3.20428	2.11404
		GSKIP	1	2.54912	1.48452
		FGL1	1	25.1067	2.9897
		SYT10	1	2.11404	1.69349
		B4GALNT3	1	4.40762	2.92817
		MYH10	1	4.37717	2.92817
		KDELC2	1	2.18859	1.60214
		FAT4	1	2.67586	1.98618
		GLDN	1	4.08405	1.97247
		MSR1	1	15.1369	6.10504
		CKM	1	67.1819	18.0009
		ARL3	1	2.41162	1.47427
		C8H12ORF57	1	2.15846	1.56917
		BDNF	1	23.4254	4.85678
		SLC1A1	1	3.36359	2.41162
		ENPEP	1	3.53081	2.11404
		CTDSP2	1	3.22657	1.98618
		LIMA1	1	2.46229	1.31039
		PLXDC2	1	2.69447	1.97247
		ZMAT2	1	2.36199	1.52626
		HOXA11	1	2.90795	1.42405
		PPP1R12B	1	11.9588	5.27803
		PYGO1	1	3.38698	1.84038
		COTL1	1	2.28153	1.70527
		JADE2	1	6.40856	2.69447
		IGF2BP3	1	2.51403	1.8025
		LOC100344571	1	7.6211	1.8025
		LRRC49	1	2.26577	1.28343
		PLXNA3	1	2.20381	1.40444
		C13H1ORF192	1	2.08493	1.48452
		SCRN1	1	2.21914	1.6245
		MGAT4C	1	5.38893	1.94531
		ERBB2	1	2.32947	1.67018
		FGB	1	2.78949	1.86607
		LEPREL2	1	2.12874	1.52626
		LOC100349667	1	4.22807	2.42839
		NCALD	1	3.07375	1.70527
		LOC100125980	1	2.73208	1.32869
		KCNK13	1	2.67586	1.81504
		CSNK1G1	1	2.37841	1.84038
		SETDB2	1	2.58471	1.56917
		PDILT	1	25.6342	3.11666
		EFNA3	1	2.01391	1.42405
		BAMBI	1	8.9383	3.01049
		HAPLN1	1	25.8125	8.81524
		SLC25A27	1	3.01049	1.79005
		FBN2	1	2.63902	1.84038
		ZFPM2	1	3.97237	1.98618
		LOC100351387	1	3.55537	1.64718
		LHFPL5	1	2.08493	1.47427
		C8H12ORF5	1	3.73213	1.46409
		IGSF3	1	3.94493	2.44528
		LOC100338668	1	2.21914	1.53688
		ATP11C	1	2.34567	1.47427
		RLA-DRB1	1	5.46416	2.9897
		ZFP37	1	4.02782	1.01396
		SKA2	1	2.9897	1.02101
		FAM216A	1	4.50023	1.04247
		CCDC30	1	1.97247	0.870551
		GABRB2	1	2.51403	1.19748
		KCNK10	1	4.65893	1.41421
		IL13RA2	1	5.50217	1.23971
		INSL5	1	2.09943	1.19748
		UCHL1	1	27.6652	0.742262
		SLC22A1	1	2.34567	1.17283
		ANGPTL3	1	3.09513	1.04972
		CYP2C16	1	2.63902	0.823591
		KCNIP4	1	4.99332	1.05702
		ELAVL2	1	46.8507	1.01396
		KIF5A	1	5.93809	1.04972
		PDGFD	1	3.73213	1.28343
		ARHGAP12	1	2.17347	0.895025
		ZBTB24	1	1.95884	0.946058
		C12H6ORF163	1	3.83706	1.02101
		SCN9A	1	4.72397	1.18099
		CASP1	1	2.71321	0.768438
		LOC100349077	1	4.56305	1.02811
		KLHDC9	1	9.44794	1.07923
		LOC100346285	1	2.09943	0.933033
		BAI3	1	2.25012	0.972655
		RGS4	1	2.80889	1.27456
		SP5	1	4.43828	1.06437
		CEP162	1	2.96905	1.03526
		NRXN1	1	9.91766	0.578344
		APOF	1	10.7034	1
		FOXN4	1	19.8353	1.22264
		PPIP5K2	1	2.08493	1.16473
		CTNNA2	1	2.05623	0.97942
		NPY	1	1458.23	3.55537
		MBL2	1	2.75108	1.02811
		HMGCLL1	1	1.91853	0.835088
		OMG	1	14.5203	1.02811
		KIAA1328	1	2.14355	1.00696
		EYA1	1	5.89708	1.45397
		VKORC1	1	2.21914	1.18099
		NEFM	1	401.707	0.876606
		CRISPLD1	1	4.75683	1.17283
		FZD2	1	1.84038	0.835088
		C3H8ORF37	1	2.75108	1.28343
		FANCL	1	2.02792	0.840896
		SCN2A	1	5.73582	1.26576
		SSMEM1	1	2.08493	0.846745
		F9	1	2.75108	1.23114
		DYNLL1	1	1.77769	0.858565
		KIF3A	1	2.21914	1.09429
		CKMT1B	1	11.7127	1.02101
		WIPI1	1	1.89212	0.846745
		RUFY2	1	1.75321	0.846745
		STMN2	1	207.937	0.697372
		AMBP	1	2.01391	1.02101
		ITGB8	1	3.53081	0.882703
		PTPRJ	1	3.34035	1.30134
		SLC6A15	1	3.605	1.00696
		DGCR2	1	2.67586	1.17283
		RLA-DMB	1	4.34694	1.01396
		USP13	1	2.67586	1.24833
		GPR115	1	3.07375	1
		CYTIP	1	3.43426	1.33793
		SLC35D3	1	7.83536	1
		JUN	1	2.47942	1.06437
		TMLHE	1	3.41054	1.10957
		PLSCR5	1	3.73213	1.00696
		ATP1B1	1	2.73208	0.835088
		GNAZ	1	3.07375	1.17283
		RSAD1	1	2.90795	1.02101
		TGM6	1	2.11404	1.02811
		PIP	1	2.02792	1.06437
		CNPY2	1	1.91853	0.939523
		LOC100354746	1	2.23457	0.952638
		LOC100341499	1	3.50642	0.80107
		KCNA4	1	2.69447	1.10957
		CDC42	1	2.17347	1.23114
		STX1A	1	2.46229	1.15669
		VSTM2L	1	33.8246	1.01396
		FAM20A	1	3.38698	0.817902
		RUNDC3A	1	5.65685	1.28343
		NMBR	1	3.43426	1.04972
		RESP18	1	625.992	1.01396
		C7H2ORF80	1	5.85634	0.933033
		LOC100338527	1	2.01391	0.812252
		CASP3	1	4.62675	0.790041
		SEMA3D	1	3.73213	1.37554
		AP3B2	1	2.08493	1.07177
		LCA5	1	2.26577	1.04247
		PACSIN1	1	5.77572	0.946058
		LY86	1	3.45815	0.768438
		NRG3	1	3.89062	0.888843
		LOC100346409	1	2.04202	1.00696
		IL36RN	1	2.25012	1.01396
		CX3CR1	1	4.50023	0.594604
		CHRNA3	1	8.39773	1.00696
		LRRC4C	1	2.65737	1.16473
		LOC100356283	1	1.93187	0.840896
		RIT2	1	30.91	1.01396
		NLRP3	1	2.71321	0.721965
		USP27X	1	2.05623	1.09429
		GABRA2	1	5.77572	1.02101
		FABP1	1	3.68075	1.15669
		SGPP2	1	6.40856	0.986233
		AVIL	1	17.7531	1.01396
		ALDH1A2	1	6.82108	0.76313
		RLA-DMA	1	5.57897	1.10191
		FNDC8	1	4.99332	1.00696
		APCS	1	2.08493	1.00696
		SLC10A4	1	6.54322	0.543367
		TMEFF2	1	14.3204	1.79005
		PAH	1	2.60268	1.09429
		PON1	1	2.37841	1.06437
		VIP	1	2.25012	1
		TSSK4	1	2.15846	1
		LOC100357938	1	2.77022	1.09429
		KCNK9	1	2.18859	1.00696
		SERPINC1	1	2.53151	1.04972
		WEE1	1	3.07375	0.993092
		SERPINF2	1	2.32947	1.04247
		OSR1	1	9.44794	1.49485
		SH3PXD2A	1	2.2974	1.04247
		ATG9A	1	3.53081	1.19748
		LURAP1L	1	3.07375	0.784584
		MLF1	1	2.18859	1.16473
		TTC18	1	2.80889	1.04247
		PDYN	1	8.11168	0.946058
		PCSK1N	1	17.6305	0.68302
		THAP6	1	1.75321	0.82932
		CLCN6	1	2.34567	1.13288
		UNC13C	1	2.62079	1.01396
		ROPN1	1	2.07053	1.01396
		TMEM130	1	7.51618	1.10957
		CYTL1	1	5.57897	1.19748
		TNFAIP8L3	1	2.67586	0.707107
		PROC	1	4.28709	1
		KCNAB3	1	2.46229	0.993092
		SELT	1	2.60268	1.21419
		SNAP25	1	62.6829	1.8025
		TM4SF4	1	18.3792	1.01396
		SLC35F4	1	5.81589	1.00696
		CHRNA5	1	7.26015	1
		WDR31	1	2.18859	0.926588
		NTN5	1	3.70635	1
		SLC28A2	1	2.25012	0.913831
		TMEM74	1	3.27161	1.20581
		LRRN3	1	5.06303	1.00696
		LOC100008895	1	93.7015	0.466516
		SYCP2	1	3.50642	1.01396
		MTHFR	1	2	0.790041
		PTPRZ1	1	4.40762	0.80107
		TMEM68	1	1.77769	0.858565
		CYP2C4	1	17.1484	1.81504
		CHDH	1	10.5561	0.986233
		VTN	1	9.00047	1.72907
		PATL2	1	1.98618	0.840896
		SYT4	1	10.7779	0.993092
		SCG2	1	10.8528	1.02101
		ELAVL4	1	46.5271	0.673617
		HTR1A	1	1.71713	0.835088
		LOC100352971	1	2.32947	0.965936
		SOGA1	1	2.75108	1.26576
		SCN4A	1	2.26577	0.823591
		AQP10	1	2.12874	1.02101
		LOC100352918	1	2.07053	0.852635
		CACNG3	1	2.58471	1.01396
		FUCA2	1	2.77022	0.986233
		APBA2	1	2.63902	1.05702
		HS1BP3	1	1.94531	0.806642
		ALDH1L2	1	1.95884	0.812252
		HCLS1	1	2.26577	1.04247
		CYP2C14	1	6.72717	1.02811
		GAP43	1	9.71356	1.04972
		LOC100346950	1	4.62675	1.45397
		LOC100353729	1	2.51403	0.939523
		GPN3	1	5.06303	0.823591
		DNAJB4	1	3.86375	0.795536
		NEFH	1	62.6829	1
		TTC9B	1	7.94474	0.517632
		MMP11	1	3.36359	1.37554
		RGS10	1	4.19887	1.09429
		CNGB1	1	2.47942	1.03526
		DNASE1L3	1	1.8025	0.835088
		INTU	1	2.05623	0.993092
		IFIH1	1	2.44528	1.13288
		KCNH1	1	1.81504	0.835088
		CNTN4	1	2.56685	0.993092
		KCNJ3	1	3.36359	1.06437
		IFITM5	1	3.20428	0.864537
		PWWP2A	1	2.25012	1.1487
		NYAP2	1	2.20381	1.04972
		RSPO2	1	7.21	0.702222
		GDPD1	1	3.97237	0.913831
		KCNJ5	1	3.55537	1.09429
		GNA12	1	2.08493	0.97942
		BHLHA9	1	2.31338	1.04972
		MMP12	1	96.3358	1.19748
		CATSPER3	1	2.41162	1.03526
		TLX2	1	14.1232	1.50525
		ITGAM	1	2	1.10191
		LOC100345807	1	2.96905	1.22264
		MAPK10	1	3.43426	1.27456
		CHL1	1	1.71713	0.823591
		SST	1	513.37	0.169882
		HRASLS	1	1.68179	0.76313
		COL14A1	1	1.89212	0.732043
		LOC103351517	1	5.81589	0.287175
		LOC100349479	1	1.31039	0.570382
		GNA15	1	1.53688	0.406126
		RFXAP	1	1.33793	0.624165
		MMP2	1	1.49485	0.582367
		PPP2R2B	1	2.09943	0.297302
		VIPR2	1	1.6245	0.521233
		ATR	1	1.48452	0.524858
		PIBF1	1	1.59107	0.768438
		IRF5	1	2.46229	0.205898
		ZRANB3	1	1.40444	0.63728
		XPO1	1	2.01391	0.586417
		LTA4H	1	1.54756	0.594604
		NAALAD2	1	3.03143	0.566442
		IRAK1BP1	1	2.07053	0.535887
		FGG	1	2.05623	0.309927
		LOC100352045	1	1.38511	0.444421
		MIS18BP1	1	1.7411	0.543367
		CCDC141	1	1.31951	0.476319
		HUS1B	1	1.6358	0.539614
		CYP4A7	1	1.97247	0.697372
		ZFP90	1	1.75321	0.646176
		SLC18A2	1	4.37717	0.0940779
		RGS7BP	1	2.47942	0.463294
		RBFOX1	1	2.62079	0.174343
		RAB6B	1	2.12874	0.61132
		AMACR	1	1.68179	0.334482
		C9H3ORF14	1	1.82766	0.721965
		XRCC5	1	1.40444	0.535887
		NTPCR	1	1.59107	0.742262
		RTN1	1	13.1775	0.105843
		LOC100339628	1	1.76541	0.702222
		ZNF660	1	1.50525	0.655197
		ZNF454	1	1.53688	0.384219
		EEF1A2	1	3.94493	0.0511189
		SLC37A2	1	1.31039	0.496546
		PMVK	1	1.71713	0.779165
		ZP1	1	2.05623	0.737135
		BRINP3	1	1.55833	0.570382
		ZNF793	1	2.39496	0.244855
		CABP1	1	2.44528	0.528509
		LOC100342879	1	2.44528	0.50698
		ZNF688	1	1.40444	0.619854
		PTPRO	1	5.61778	0.420448
		SYT1	1	35.5062	0.219151
		KBTBD3	1	1.31039	0.632878
		PEX2	1	1.50525	0.632878
		PPEF1	1	2.05623	0.598739
		CREBL2	1	2.04202	0.463294
		CREB3L4	1	1.77769	0.550953
		LOC100345657	1	1.79005	0.779165
		GPR183	1	2.36199	0.528509
		LRIF1	1	1.81504	0.356013
		P2RY13	1	2.21914	0.25
		PAX6	1	1.60214	0.517632
		COQ5	1	1.46409	0.697372
		CRYBA4	1	1.49485	0.602904
		IMPA1	1	1.6245	0.590496
		SMG8	1	1.39474	0.641713
		ST8SIA1	1	1.97247	0.598739
		TTC12	1	1.56917	0.732043
		ARL2BP	1	1.37554	0.554785
		CXXC4	1	5.27803	0.376312
		CDKN2B	1	1.94531	0.339151
		DYNC1I1	1	3.16017	0.61132
		LCP2	1	1.32869	0.607097
		LOC100358851	1	1.61328	0.790041
		HESX1	1	1.8025	0.795536
		PMS1	1	1.38511	0.514057
		PTPRQ	1	1.85318	0.456916
		ANKRD29	1	1.64718	0.687771
		PANK1	1	2.21914	0.154963
		LOC100353681	1	1.94531	0.687771
		SGPL1	1	1.64718	0.773782
		CLVS2	1	1.84038	0.456916
		JAG1	1	1.70527	0.742262
		C9H18ORF54	1	1.46409	0.397768
		SYT17	1	2.12874	0.408951
		ADAT2	1	1.40444	0.655197
		TBC1D19	1	1.87905	0.721965
		CCDC129	1	1.69349	0.619854
		TOMM20L	1	1.86607	0.721965
		ALOX15	1	1.42405	0.496546
		CLEC4E	1	1.43396	0.590496
		ERICH5	1	1.76541	0.773782
		DYNLRB2	1	1.6245	0.673617
		PPP2R2C	1	2.46229	0.389582
		HOXA10	1	2.63902	0.678302
		SLC9A5	1	1.42405	0.558644
		SPOCK3	1	5.93809	0.0647041
		HPGD	1	1.68179	0.45376
		ZUFSP	1	1.59107	0.790041
		GARNL3	1	2.07053	0.400535
		MPEG1	1	1.58008	0.532185
		RRAD	1	2.12874	0.570382
		ULK4	1	1.40444	0.692555
		KCNK2	1	3.55537	0.532185
		SSBP3	1	1.59107	0.737135
		COL5A2	1	1.75321	0.668964
		KCNE3	1	1.98618	0.303549
		ATOH8	1	1.32869	0.586417
		EVI2A	1	3.65533	0.532185
		TLR2	1	1.79005	0.45376
		IGSF10	1	1.45397	0.668964
		DYNC2LI1	1	1.55833	0.747425
		METTL5	1	1.36604	0.632878
		ABHD4	1	1.46409	0.692555
		FIG4	1	1.33793	0.624165
		ZNF280D	1	1.47427	0.650671
		COQ2	1	1.59107	0.624165
		LPHN2	1	1.67018	0.707107
		AP1AR	1	1.89212	0.779165
		SYT6	1	1.84038	0.628507
		ABCB8	1	1.43396	0.578344
		C12H6ORF203	1	1.31039	0.650671
		GLT8D1	1	1.69349	0.779165
		LOC100344648	1	1.44393	0.590496
		PBX2	1	1.56917	0.673617
		DNAJC5G	1	2.2974	0.528509
		CDS1	1	2.92817	0.389582
		RARS2	1	1.49485	0.742262
		CLEC7A	1	3.36359	0.351111
		HECW2	1	1.61328	0.63728
		WNT5B	1	1.89212	0.752623
		HHATL	1	1.95884	0.255253
		ZFYVE26	1	1.97247	0.420448
		LPCAT2	1	3.27161	0.225313
		ENKD1	1	2.12874	0.309927
		KCND3	1	1.26576	0.624165
		LOC100346308	1	2.77022	0.45376
		INTS12	1	1.50525	0.716978
		SYTL2	1	1.69349	0.285191
		KATNAL1	1	1.54756	0.737135
		SARM1	1	4.69134	0.392292
		PLCXD3	1	2.49666	0.628507
		SIGLECL1	1	1.55833	0.673617
		ZNF311	1	1.34723	0.655197
		CAPRIN2	1	1.38511	0.532185
		CCDC181	1	1.69349	0.659754
		SPTLC3	1	1.65864	0.570382
		NYAP1	1	2.34567	0.417544
		SULT4A1	1	2.05623	0.373712
		CETN1	1	1.76541	0.510506
		LRRC17	1	1.86607	0.641713
		SLAMF9	1	1.45397	0.624165
		CCDC173	1	1.93187	0.624165
		NECAB1	1	1.84038	0.768438
		SPIN3	1	1.31951	0.594604
		LOC100355134	1	1.7411	0.550953
		MEIOB	1	3.27161	0.486327
		KANSL1L	1	1.49485	0.460094
		ZNF189	1	1.32869	0.473029
		CD101	1	1.40444	0.406126
		WNT8B	1	1.37554	0.664343
		SLC7A14	1	2	0.444421
		SFXN3	1	1.21419	0.602904
		ADRA1B	1	1.65864	0.392292
		ERLIN2	1	1.43396	0.429283
		REEP2	1	1.48452	0.432269
		LRRC73	1	1.26576	0.578344
		TRIM36	1	2.20381	0.602904
